# Supplementary material for: An Inflammatory Response Related Gene Signature Associated with Survival Outcome and Gemcitabine Response in Patients with Pancreatic Ductal Adenocarcinoma
Source: Front Pharmacol. 2021 Dec 23;12:778294. doi: 10.3389/fphar.2021.778294 (PMC8733666; doi:10.3389/fphar.2021.778294)
Supplement: Supplementary file 2 [file DataSheet1.xlsx]

## Sheet: Table S1
Supplementary Table 1: Clinical information of patients
Cohort	E-MTAB-6134	PACA-AU	TCGA-PAAD	GSE71729	GSE62452	PACA-CA	GSE21501	E-MTAB-6830	GSE85916	GSE57495	GSE79668
No. of patients	284	255	138	114	63	108	97	90	76	63	49
Country	French and Belgian	Australia	USA	USA	USA	Canada	USA	Netherlands	Belgium	USA	USA
Age (years)	NA	66.47±10.66	64.60±10.93	NA	NA	64.68±10.56	NA	65.46±8.65	NA	NA	63.80±11.63
Sex
Female	120	119	76	NA	NA	52	NA	36	NA	NA	18
Male	164	136	92	NA	NA	51	NA	54	NA	NA	30
Stage
Ⅰ	NA	NA	19	NA	4	1	NA	NA	NA	1	NA
Ⅱ	NA	NA	139	NA	43	98	NA	NA	NA	12	NA
Ⅲ	NA	NA	3	NA	10	1	NA	NA	NA	17	NA
Ⅳ	NA	NA	4	NA	6	1	NA	NA	NA	33	NA
NA	NA	NA	3	NA	0	2	NA	NA	NA	0	NA
T stage
T1	12	6	7	NA	NA	NA	2	NA	NA	NA	3
T2	38	38	21	NA	NA	NA	16	NA	NA	NA	12
T3	234	204	135	NA	NA	NA	74	NA	NA	NA	29
T4	0	3	3	NA	NA	NA	4	NA	NA	NA	0
TX	0	2	1	NA	NA	NA	0	NA	NA	NA	0
NA	0	2	1	NA	NA	NA	4	NA	NA	NA	5
N stage
N0	70	60	47	NA	NA	NA	27	NA	NA	NA	14
N1	214	190	116	NA	NA	NA	69	NA	NA	NA	35
NX	0	3	4	NA	NA	NA	0	NA	NA	NA	0
NA	0	2	1	NA	NA	NA	1	NA	NA	NA	0
M stage
M0	NA	8	76	NA	NA	NA	NA	NA	NA	NA	46
M1	NA	11	4	NA	NA	NA	NA	NA	NA	NA	1
MX	NA	234	88	NA	NA	NA	NA	NA	NA	NA	0
NA		2	0	NA	NA	NA	NA	NA	NA	NA	2
Tumor grade
G1	110	17	28	NA	2	17	NA	8	NA	NA	NA
G2	127	146	90	NA	30	53	NA	44	NA	NA	NA
G3	47	83	46	NA	29	30	NA	35	NA	NA	NA
G4	0	5	2	NA	1	0	NA	0	NA	NA	NA
GX	0	3	2	NA	1	0	NA	3	NA	NA	NA
NA	0	1	0	NA	0	3	NA	0	NA	NA	NA
Survival status
Dead	178	149	89	80	47	84	65	81	54	42	43
Alive	106	106	79	34	16	19	32	9	22	21	6
Survival time (years)	2.52±2.24	1.57±0.49	1.63±1.30	1.50±1.15	1.73±1.38	2.09±1.48	1.52±1.13	2.27±2.03	2.42±2.55	1.99±1.25	2.29±2.15
Neoadjuvant therapy
Yes	0	NA	0	NA	NA	NA	2	4	0	NA	0
No	284	NA	138	NA	NA	NA	95	86	76	NA	49

## Sheet: Table S2
Supplementary Table 2: The information of previous published signatures
Signature name	Genes	Training cohort	Validation cohort	Pulication year	PMID
Glycolysis-related gene signature	ALDH3B1, PGM1, MET, KIF20A, ABCB6, NT5E, CHST12, GPR87, CDK1, B3GNT3, CACNA1H	TCGA-PAAD	GSE62452	2021	34249078
Ferroptosis-related gene signature	CAV1, DDIT4, SLC40A1, SRXN1, TFAP2C	TCGA-PAAD	E-MTAB-6134, PACA-CA	2021	34631790
Hypoxia-related gene signature	PGK1, ENO3, LDHA, PGM1	TCGA-PAAD	GSE78229, GSE57495	2021	33865399
m6A-related gene signature	CDHR3, CELSR3, CELSR3, EGF, FGF10, GAD1, MT1H, NMUR2, PAH, PGC, PGM5, POPDC2, PPFIA3, SERPINA4, TMEM145, TNNT1, ZPLD1	TCGA-PAAD	PACA-AU	2020	32490170
Autophagy-related gene signature	TP63, RAB24, APOL1, PTK6	TCGA-PAAD	GSE78229	2021	34262410
Immune-related gene signature	WFIKKN1, PLAU, OASL, FGF17, NPPA, IL20RB, MET, SHC2	TCGA-PAAD	GSE71729	2021	34335699

## Sheet: Table S3
Supplementary Table 3: Genes contained in GOBP inflammatory response gene set
Gene Symbol	Category
ABCC1	Protein Coding
ABCC2	Protein Coding
ABCD1	Protein Coding
ABCD2	Protein Coding
ABCF1	Protein Coding
ABHD12	Protein Coding
ACE2	Protein Coding
ACKR1	Protein Coding
ACKR2	Protein Coding
ACOD1	Protein Coding
ACVR1	Protein Coding
ADA	Protein Coding
ADAM8	Protein Coding
ADAMTS12	Protein Coding
ADCY1	Protein Coding
ADCY7	Protein Coding
ADCY8	Protein Coding
ADCYAP1	Protein Coding
ADGRE2	Protein Coding
ADGRE5	Protein Coding
ADIPOQ	Protein Coding
ADM	Protein Coding
ADORA1	Protein Coding
ADORA2A	Protein Coding
ADORA3	Protein Coding
AFAP1L2	Protein Coding
AGER	Protein Coding
AGT	Protein Coding
AGTR1	Protein Coding
AGTR2	Protein Coding
AHCY	Protein Coding
AHSG	Protein Coding
AIF1	Protein Coding
AIM2	Protein Coding
AIMP1	Protein Coding
AKNA	Protein Coding
AKT1	Protein Coding
ALOX15	Protein Coding
ALOX5	Protein Coding
ANO6	Protein Coding
ANXA1	Protein Coding
AOAH	Protein Coding
AOC3	Protein Coding
AP3B1	Protein Coding
APCS	Protein Coding
APOA1	Protein Coding
APOD	Protein Coding
APOE	Protein Coding
APOL2	Protein Coding
APOL3	Protein Coding
APP	Protein Coding
APPL1	Protein Coding
APPL2	Protein Coding
AREL1	Protein Coding
ASH1L	Protein Coding
ASS1	Protein Coding
ATM	Protein Coding
ATRN	Protein Coding
AXL	Protein Coding
AZU1	Protein Coding
B4GALT1	Protein Coding
BAP1	Protein Coding
BCL6	Protein Coding
BCL6B	Protein Coding
BDKRB1	Protein Coding
BDKRB2	Protein Coding
BIRC2	Protein Coding
BIRC3	Protein Coding
BLNK	Protein Coding
BMP2	Protein Coding
BMP6	Protein Coding
BMPR1B	Protein Coding
BRD4	Protein Coding
BST1	Protein Coding
BTK	Protein Coding
C1QTNF12	Protein Coding
C1QTNF3	Protein Coding
C2CD4A	Protein Coding
C2CD4B	Protein Coding
C3	Protein Coding
C3AR1	Protein Coding
C4A	Protein Coding
C4B	Protein Coding
C5	Protein Coding
C5AR1	Protein Coding
C5AR2	Protein Coding
CALCA	Protein Coding
CALCRL	Protein Coding
CAMK1D	Protein Coding
CAMK4	Protein Coding
CARD18	Protein Coding
CASP1	Protein Coding
CASP12	Protein Coding
CASP4	Protein Coding
CASP5	Protein Coding
CCL1	Protein Coding
CCL11	Protein Coding
CCL13	Protein Coding
CCL14	Protein Coding
CCL15	Protein Coding
CCL16	Protein Coding
CCL17	Protein Coding
CCL18	Protein Coding
CCL19	Protein Coding
CCL2	Protein Coding
CCL20	Protein Coding
CCL21	Protein Coding
CCL22	Protein Coding
CCL23	Protein Coding
CCL24	Protein Coding
CCL25	Protein Coding
CCL26	Protein Coding
CCL3	Protein Coding
CCL3L1	Protein Coding
CCL3L3	Protein Coding
CCL4	Protein Coding
CCL5	Protein Coding
CCL7	Protein Coding
CCL8	Protein Coding
CCN3	Protein Coding
CCN4	Protein Coding
CCR1	Protein Coding
CCR2	Protein Coding
CCR3	Protein Coding
CCR4	Protein Coding
CCR5	Protein Coding
CCR6	Protein Coding
CCR7	Protein Coding
CCRL2	Protein Coding
CD14	Protein Coding
CD163	Protein Coding
CD180	Protein Coding
CD200	Protein Coding
CD200R1	Protein Coding
CD200R1L	Protein Coding
CD28	Protein Coding
CD36	Protein Coding
CD40	Protein Coding
CD40LG	Protein Coding
CD44	Protein Coding
CD47	Protein Coding
CD5L	Protein Coding
CD6	Protein Coding
CD68	Protein Coding
CD81	Protein Coding
CD96	Protein Coding
CDH5	Protein Coding
CDK19	Protein Coding
CDO1	Protein Coding
CEBPA	Protein Coding
CEBPB	Protein Coding
CELA1	Protein Coding
CELF1	Protein Coding
CERS6	Protein Coding
CHI3L1	Protein Coding
CHIA	Protein Coding
CHID1	Protein Coding
CHST1	Protein Coding
CHST2	Protein Coding
CHST4	Protein Coding
CHUK	Protein Coding
CIITA	Protein Coding
CLEC7A	Protein Coding
CLOCK	Protein Coding
CMA1	Protein Coding
CMKLR1	Protein Coding
CNR1	Protein Coding
CNR2	Protein Coding
CREB3L3	Protein Coding
CRH	Protein Coding
CRHBP	Protein Coding
CRP	Protein Coding
CSF1	Protein Coding
CSF1R	Protein Coding
CSRP3	Protein Coding
CST7	Protein Coding
CTNNBIP1	Protein Coding
CTSC	Protein Coding
CUEDC2	Protein Coding
CX3CL1	Protein Coding
CXCL1	Protein Coding
CXCL10	Protein Coding
CXCL11	Protein Coding
CXCL13	Protein Coding
CXCL17	Protein Coding
CXCL2	Protein Coding
CXCL3	Protein Coding
CXCL5	Protein Coding
CXCL6	Protein Coding
CXCL8	Protein Coding
CXCL9	Protein Coding
CXCR2	Protein Coding
CXCR3	Protein Coding
CXCR4	Protein Coding
CXCR6	Protein Coding
CYBA	Protein Coding
CYBB	Protein Coding
CYLD	Protein Coding
CYP26B1	Protein Coding
CYP4F11	Protein Coding
CYSLTR1	Protein Coding
DAB2IP	Protein Coding
DAGLA	Protein Coding
DAGLB	Protein Coding
DDT	Protein Coding
DEFB114	Protein Coding
DHX9	Protein Coding
DNASE1	Protein Coding
DNASE1L3	Protein Coding
DPEP1	Protein Coding
DROSHA	Protein Coding
DUOXA1	Protein Coding
DUOXA2	Protein Coding
DUSP10	Protein Coding
ECM1	Protein Coding
EDNRB	Protein Coding
EGFR	Protein Coding
EIF2AK1	Protein Coding
ELANE	Protein Coding
ELF3	Protein Coding
ENPP3	Protein Coding
EPHA2	Protein Coding
EPO	Protein Coding
ESR1	Protein Coding
ETS1	Protein Coding
EXT1	Protein Coding
F11R	Protein Coding
F12	Protein Coding
F2	Protein Coding
F2R	Protein Coding
F2RL1	Protein Coding
F3	Protein Coding
F8	Protein Coding
FABP4	Protein Coding
FANCA	Protein Coding
FANCD2	Protein Coding
FCGR2B	Protein Coding
FEM1A	Protein Coding
FFAR2	Protein Coding
FFAR3	Protein Coding
FFAR4	Protein Coding
FN1	Protein Coding
FNDC4	Protein Coding
FOLR2	Protein Coding
FOS	Protein Coding
FOXF1	Protein Coding
FOXP1	Protein Coding
FOXP3	Protein Coding
FPR1	Protein Coding
FPR2	Protein Coding
FPR3	Protein Coding
FUT7	Protein Coding
GAL	Protein Coding
GATA3	Protein Coding
GBA	Protein Coding
GBP5	Protein Coding
GGT1	Protein Coding
GGT2	Protein Coding
GGT3P	Protein Coding
GGT5	Protein Coding
GHRL	Protein Coding
GHSR	Protein Coding
GIT1	Protein Coding
GJA1	Protein Coding
GPER1	Protein Coding
GPR17	Protein Coding
GPR31	Protein Coding
GPR32	Protein Coding
GPR32P1	Protein Coding
GPR33	Protein Coding
GPR4	Protein Coding
GPR68	Protein Coding
GPRC5B	Protein Coding
GPS2	Protein Coding
GPSM3	Protein Coding
GPX1	Protein Coding
GRN	Protein Coding
GSDMD	Protein Coding
GSTP1	Protein Coding
H19	Protein Coding
H2BC1	Protein Coding
HAMP	Protein Coding
HAVCR2	Protein Coding
HCK	Protein Coding
HDAC4	Protein Coding
HDAC5	Protein Coding
HDAC9	Protein Coding
HFE	Protein Coding
HGF	Protein Coding
HIF1A	Protein Coding
HK1	Protein Coding
HLA-DRB1	Protein Coding
HLA-E	Protein Coding
HMGB1	Protein Coding
HMGB2	Protein Coding
HMOX1	Protein Coding
HNRNPA0	Protein Coding
HP	Protein Coding
HPR	Protein Coding
HRH1	Protein Coding
HRH4	Protein Coding
HSPG2	Protein Coding
HYAL1	Protein Coding
HYAL2	Protein Coding
HYAL3	Protein Coding
ICAM1	Protein Coding
IDO1	Protein Coding
IFI16	Protein Coding
IFI35	Protein Coding
IFNA2	Protein Coding
IFNG	Protein Coding
IGF1	Protein Coding
IGFBP4	Protein Coding
IKBKB	Protein Coding
IKBKG	Protein Coding
IL10	Protein Coding
IL10RB	Protein Coding
IL12B	Protein Coding
IL13	Protein Coding
IL15	Protein Coding
IL16	Protein Coding
IL17A	Protein Coding
IL17B	Protein Coding
IL17C	Protein Coding
IL17D	Protein Coding
IL17F	Protein Coding
IL17RA	Protein Coding
IL17RC	Protein Coding
IL17RE	Protein Coding
IL18	Protein Coding
IL18R1	Protein Coding
IL18RAP	Protein Coding
IL1A	Protein Coding
IL1B	Protein Coding
IL1F10	Protein Coding
IL1R1	Protein Coding
IL1R2	Protein Coding
IL1RAP	Protein Coding
IL1RL1	Protein Coding
IL1RL2	Protein Coding
IL1RN	Protein Coding
IL2	Protein Coding
IL20	Protein Coding
IL20RB	Protein Coding
IL21	Protein Coding
IL22	Protein Coding
IL22RA2	Protein Coding
IL23A	Protein Coding
IL23R	Protein Coding
IL25	Protein Coding
IL27	Protein Coding
IL2RA	Protein Coding
IL31RA	Protein Coding
IL33	Protein Coding
IL34	Protein Coding
IL36A	Protein Coding
IL36B	Protein Coding
IL36G	Protein Coding
IL36RN	Protein Coding
IL37	Protein Coding
IL4	Protein Coding
IL4R	Protein Coding
IL5	Protein Coding
IL5RA	Protein Coding
IL6	Protein Coding
IL6R	Protein Coding
IL6ST	Protein Coding
IL9	Protein Coding
INS	Protein Coding
IRAK2	Protein Coding
IRF3	Protein Coding
IRF5	Protein Coding
IRGM	Protein Coding
ISL1	Protein Coding
ITCH	Protein Coding
ITGA2	Protein Coding
ITGAL	Protein Coding
ITGB1	Protein Coding
ITGB2	Protein Coding
ITGB6	Protein Coding
ITIH4	Protein Coding
JAK2	Protein Coding
JAM3	Protein Coding
KARS1	Protein Coding
KDM6B	Protein Coding
KIT	Protein Coding
KLF4	Protein Coding
KLKB1	Protein Coding
KLRG1	Protein Coding
KNG1	Protein Coding
KPNA6	Protein Coding
KRT1	Protein Coding
KRT16	Protein Coding
LACC1	Protein Coding
LAT	Protein Coding
LBP	Protein Coding
LDLR	Protein Coding
LEP	Protein Coding
LGALS9	Protein Coding
LIAS	Protein Coding
LILRA5	Protein Coding
LILRB4	Protein Coding
LIPA	Protein Coding
LOXL3	Protein Coding
LPCAT3	Protein Coding
LPL	Protein Coding
LRFN5	Protein Coding
LRRC19	Protein Coding
LRRK2	Protein Coding
LTA	Protein Coding
LTB4R	Protein Coding
LTB4R2	Protein Coding
LXN	Protein Coding
LY75	Protein Coding
LY86	Protein Coding
LY96	Protein Coding
LYN	Protein Coding
LYZ	Protein Coding
MACIR	Protein Coding
MAP2K3	Protein Coding
MAPK13	Protein Coding
MAPK14	Protein Coding
MAPK7	Protein Coding
MAPKAPK2	Protein Coding
MAS1	Protein Coding
MBL2	Protein Coding
MCPH1	Protein Coding
MDK	Protein Coding
MEFV	Protein Coding
MEP1B	Protein Coding
METRNL	Protein Coding
MFHAS1	Protein Coding
MGLL	Protein Coding
MGST2	Protein Coding
MIF	Protein Coding
MIR105-1	RNA Gene
MIR125A	RNA Gene
MIR126	RNA Gene
MIR128-1	RNA Gene
MIR129-1	RNA Gene
MIR135A1	RNA Gene
MIR136	RNA Gene
MIR138-1	RNA Gene
MIR140	RNA Gene
MIR141	RNA Gene
MIR142	RNA Gene
MIR144	RNA Gene
MIR145	RNA Gene
MIR146A	RNA Gene
MIR149	RNA Gene
MIR152	RNA Gene
MIR15A	RNA Gene
MIR15B	RNA Gene
MIR16-1	RNA Gene
MIR17	RNA Gene
MIR181A2	RNA Gene
MIR181B1	RNA Gene
MIR181C	RNA Gene
MIR187	RNA Gene
MIR195	RNA Gene
MIR197	RNA Gene
MIR19A	RNA Gene
MIR19B1	RNA Gene
MIR203A	RNA Gene
MIR204	RNA Gene
MIR205	RNA Gene
MIR206	RNA Gene
MIR20A	RNA Gene
MIR21	RNA Gene
MIR22	RNA Gene
MIR221	RNA Gene
MIR222	RNA Gene
MIR223	RNA Gene
MIR26A1	RNA Gene
MIR30C2	RNA Gene
MIR31	RNA Gene
MIR338	RNA Gene
MIR361	RNA Gene
MIR378A	RNA Gene
MIR3909	RNA Gene
MIR488	RNA Gene
MIR590	RNA Gene
MIR657	RNA Gene
MIR675	RNA Gene
MIR6869	RNA Gene
MIR766	RNA Gene
MIR920	RNA Gene
MIR92A1	RNA Gene
MIR93	RNA Gene
MIR98	RNA Gene
MIRLET7G	RNA Gene
MMP25	Protein Coding
MMP26	Protein Coding
MMP3	Protein Coding
MMP8	Protein Coding
MMP9	Protein Coding
MRGPRX1	Protein Coding
MS4A2	Protein Coding
MSMP	Protein Coding
MVK	Protein Coding
MYD88	Protein Coding
MYLK3	Protein Coding
NAIP	Protein Coding
NAPEPLD	Protein Coding
NCR3	Protein Coding
NDFIP1	Protein Coding
NDST1	Protein Coding
NEAT1	Protein Coding
NFAM1	Protein Coding
NFATC3	Protein Coding
NFATC4	Protein Coding
NFE2L2	Protein Coding
NFKB1	Protein Coding
NFKBIA	Protein Coding
NFKBID	Protein Coding
NFKBIZ	Protein Coding
NFX1	Protein Coding
NLRC3	Protein Coding
NLRC4	Protein Coding
NLRP1	Protein Coding
NLRP10	Protein Coding
NLRP12	Protein Coding
NLRP2	Protein Coding
NLRP3	Protein Coding
NLRP4	Protein Coding
NLRP6	Protein Coding
NLRP7	Protein Coding
NLRP9	Protein Coding
NLRX1	Protein Coding
NMI	Protein Coding
NOD1	Protein Coding
NOD2	Protein Coding
NOS2	Protein Coding
NOTCH1	Protein Coding
NOTCH2	Protein Coding
NOX1	Protein Coding
NOX4	Protein Coding
NPFF	Protein Coding
NPY5R	Protein Coding
NR1D1	Protein Coding
NR1D2	Protein Coding
NR1H3	Protein Coding
NR1H4	Protein Coding
NRROS	Protein Coding
NT5E	Protein Coding
NUPR1	Protein Coding
ODAM	Protein Coding
OGG1	Protein Coding
OLR1	Protein Coding
OPRM1	Protein Coding
ORM1	Protein Coding
ORM2	Protein Coding
OSM	Protein Coding
OSMR	Protein Coding
OTULIN	Protein Coding
P2RX1	Protein Coding
PARK7	Protein Coding
PARP4	Protein Coding
PBK	Protein Coding
PDCD4	Protein Coding
PDE2A	Protein Coding
PER1	Protein Coding
PF4	Protein Coding
PF4V1	Protein Coding
PGLYRP2	Protein Coding
PIK3AP1	Protein Coding
PIK3CD	Protein Coding
PIK3CG	Protein Coding
PJA2	Protein Coding
PLA2G2A	Protein Coding
PLA2G2D	Protein Coding
PLA2G2E	Protein Coding
PLA2G3	Protein Coding
PLA2G4B	Protein Coding
PLA2G4C	Protein Coding
PLA2G7	Protein Coding
PLAA	Protein Coding
PLD3	Protein Coding
PLD4	Protein Coding
PLGRKT	Protein Coding
PLP1	Protein Coding
PLSCR1	Protein Coding
PNMA1	Protein Coding
POLB	Protein Coding
PPARA	Protein Coding
PPARD	Protein Coding
PPARG	Protein Coding
PPBP	Protein Coding
PRCP	Protein Coding
PRDX2	Protein Coding
PRDX5	Protein Coding
PRKCD	Protein Coding
PRKCQ	Protein Coding
PRKCZ	Protein Coding
PRKD1	Protein Coding
PROC	Protein Coding
PROK2	Protein Coding
PSMA1	Protein Coding
PSMA6	Protein Coding
PSMB4	Protein Coding
PSTPIP1	Protein Coding
PTAFR	Protein Coding
PTGDR	Protein Coding
PTGER1	Protein Coding
PTGER2	Protein Coding
PTGER3	Protein Coding
PTGER4	Protein Coding
PTGES	Protein Coding
PTGFR	Protein Coding
PTGIR	Protein Coding
PTGIS	Protein Coding
PTGS1	Protein Coding
PTGS2	Protein Coding
PTN	Protein Coding
PTPN2	Protein Coding
PTPRC	Protein Coding
PTX3	Protein Coding
PXK	Protein Coding
PYCARD	Protein Coding
PYDC2	Protein Coding
RAC1	Protein Coding
RARRES2	Protein Coding
RB1	Protein Coding
RBPJ	Protein Coding
REG3A	Protein Coding
REG3G	Protein Coding
REL	Protein Coding
RELA	Protein Coding
RELB	Protein Coding
RHBDD3	Protein Coding
RICTOR	Protein Coding
RIPK1	Protein Coding
RIPK2	Protein Coding
RORA	Protein Coding
RPS19	Protein Coding
RPS6KA4	Protein Coding
RPS6KA5	Protein Coding
S100A12	Protein Coding
S100A8	Protein Coding
S100A9	Protein Coding
S1PR3	Protein Coding
SAA1	Protein Coding
SAA2	Protein Coding
SAA4	Protein Coding
SBNO2	Protein Coding
SCG2	Protein Coding
SCGB1A1	Protein Coding
SCN9A	Protein Coding
SCUBE1	Protein Coding
SCYL1	Protein Coding
SCYL3	Protein Coding
SDC1	Protein Coding
SELE	Protein Coding
SELENOS	Protein Coding
SELP	Protein Coding
SEMA7A	Protein Coding
SERPINA1	Protein Coding
SERPINA3	Protein Coding
SERPINC1	Protein Coding
SERPINE1	Protein Coding
SERPINF1	Protein Coding
SERPINF2	Protein Coding
SETD6	Protein Coding
SGMS1	Protein Coding
SHARPIN	Protein Coding
SHPK	Protein Coding
SIGIRR	Protein Coding
SIGLEC1	Protein Coding
SIGLEC10	Protein Coding
SIRPA	Protein Coding
SLAMF8	Protein Coding
SLC11A1	Protein Coding
SMAD1	Protein Coding
SMAD3	Protein Coding
SMPDL3B	Protein Coding
SNAP23	Protein Coding
SNCA	Protein Coding
SNX4	Protein Coding
SOCS3	Protein Coding
SOCS5	Protein Coding
SOD1	Protein Coding
SPATA2	Protein Coding
SPHK1	Protein Coding
SPP1	Protein Coding
STAB1	Protein Coding
STAP1	Protein Coding
STAT3	Protein Coding
STAT5B	Protein Coding
STING1	Protein Coding
STK39	Protein Coding
SUCNR1	Protein Coding
SYK	Protein Coding
SYT11	Protein Coding
TAC1	Protein Coding
TAC4	Protein Coding
TACR1	Protein Coding
TAFA3	Protein Coding
TBK1	Protein Coding
TBXA2R	Protein Coding
TCIRG1	Protein Coding
TEK	Protein Coding
TFR2	Protein Coding
TGFB1	Protein Coding
TGM2	Protein Coding
THBS1	Protein Coding
THEMIS2	Protein Coding
TICAM1	Protein Coding
TICAM2	Protein Coding
TIMP1	Protein Coding
TIRAP	Protein Coding
TLR1	Protein Coding
TLR10	Protein Coding
TLR2	Protein Coding
TLR3	Protein Coding
TLR4	Protein Coding
TLR5	Protein Coding
TLR6	Protein Coding
TLR7	Protein Coding
TLR8	Protein Coding
TLR9	Protein Coding
TMIGD3	Protein Coding
TMSB4X	Protein Coding
TNF	Protein Coding
TNFAIP3	Protein Coding
TNFAIP6	Protein Coding
TNFAIP8L2	Protein Coding
TNFRSF11A	Protein Coding
TNFRSF1A	Protein Coding
TNFRSF1B	Protein Coding
TNFRSF4	Protein Coding
TNFSF11	Protein Coding
TNFSF18	Protein Coding
TNFSF4	Protein Coding
TNIP1	Protein Coding
TNIP2	Protein Coding
TNIP3	Protein Coding
TOLLIP	Protein Coding
TPST1	Protein Coding
TRADD	Protein Coding
TRAF3IP2	Protein Coding
TREM1	Protein Coding
TREM2	Protein Coding
TREX1	Protein Coding
TRIL	Protein Coding
TRIM55	Protein Coding
TSLP	Protein Coding
TSPAN2	Protein Coding
TTBK1	Protein Coding
TUSC2	Protein Coding
TYRO3	Protein Coding
UCN	Protein Coding
UFL1	Protein Coding
UGT1A1	Protein Coding
UMOD	Protein Coding
UNC13D	Protein Coding
USP18	Protein Coding
VAMP7	Protein Coding
VAMP8	Protein Coding
VCAM1	Protein Coding
VNN1	Protein Coding
VPS35	Protein Coding
WDR83	Protein Coding
WFDC1	Protein Coding
WNT5A	Protein Coding
XCL1	Protein Coding
XCL2	Protein Coding
XCR1	Protein Coding
XIAP	Protein Coding
ZBP1	Protein Coding
ZC3H12A	Protein Coding
ZNF580	Protein Coding
ZP3	Protein Coding
ZYX	Protein Coding

## Sheet: Table S4
Supplementary Table 4: Genes contained in "Hallmark inflammatory response" gene set
Gene Symbol	Category
ABCA1	Protein Coding
ABI1	Protein Coding
ACVR1B	Protein Coding
ACVR2A	Protein Coding
ADGRE1	Protein Coding
ADM	Protein Coding
ADORA2B	Protein Coding
ADRM1	Protein Coding
AHR	Protein Coding
APLNR	Protein Coding
AQP9	Protein Coding
ATP2A2	Protein Coding
ATP2B1	Protein Coding
ATP2C1	Protein Coding
AXL	Protein Coding
BDKRB1	Protein Coding
BEST1	Protein Coding
BST2	Protein Coding
BTG2	Protein Coding
C3AR1	Protein Coding
C5AR1	Protein Coding
CALCRL	Protein Coding
CCL17	Protein Coding
CCL2	Protein Coding
CCL20	Protein Coding
CCL22	Protein Coding
CCL24	Protein Coding
CCL5	Protein Coding
CCL7	Protein Coding
CCR7	Protein Coding
CCRL2	Protein Coding
CD14	Protein Coding
CD40	Protein Coding
CD48	Protein Coding
CD55	Protein Coding
CD69	Protein Coding
CD70	Protein Coding
CD82	Protein Coding
CDKN1A	Protein Coding
CHST2	Protein Coding
CLEC5A	Protein Coding
CMKLR1	Protein Coding
CSF1	Protein Coding
CSF3	Protein Coding
CSF3R	Protein Coding
CX3CL1	Protein Coding
CXCL10	Protein Coding
CXCL11	Protein Coding
CXCL6	Protein Coding
CXCL8	Protein Coding
CXCL9	Protein Coding
CXCR6	Protein Coding
CYBB	Protein Coding
DCBLD2	Protein Coding
EBI3	Protein Coding
EDN1	Protein Coding
EIF2AK2	Protein Coding
EMP3	Protein Coding
EREG	Protein Coding
F3	Protein Coding
FFAR2	Protein Coding
FPR1	Protein Coding
FZD5	Protein Coding
GABBR1	Protein Coding
GCH1	Protein Coding
GNA15	Protein Coding
GNAI3	Protein Coding
GP1BA	Protein Coding
GPC3	Protein Coding
GPR132	Protein Coding
GPR183	Protein Coding
HAS2	Protein Coding
HBEGF	Protein Coding
HIF1A	Protein Coding
HPN	Protein Coding
HRH1	Protein Coding
ICAM1	Protein Coding
ICAM4	Protein Coding
ICOSLG	Protein Coding
IFITM1	Protein Coding
IFNAR1	Protein Coding
IFNGR2	Protein Coding
IL10	Protein Coding
IL10RA	Protein Coding
IL12B	Protein Coding
IL15	Protein Coding
IL15RA	Protein Coding
IL18	Protein Coding
IL18R1	Protein Coding
IL18RAP	Protein Coding
IL1A	Protein Coding
IL1B	Protein Coding
IL1R1	Protein Coding
IL2RB	Protein Coding
IL4R	Protein Coding
IL6	Protein Coding
IL7R	Protein Coding
INHBA	Protein Coding
IRAK2	Protein Coding
IRF1	Protein Coding
IRF7	Protein Coding
ITGA5	Protein Coding
ITGB3	Protein Coding
ITGB8	Protein Coding
KCNA3	Protein Coding
KCNJ2	Protein Coding
KCNMB2	Protein Coding
KIF1B	Protein Coding
KLF6	Protein Coding
LAMP3	Protein Coding
LCK	Protein Coding
LCP2	Protein Coding
LDLR	Protein Coding
LIF	Protein Coding
LPAR1	Protein Coding
LTA	Protein Coding
LY6E	Protein Coding
LYN	Protein Coding
MARCO	Protein Coding
MEFV	Protein Coding
MEP1A	Protein Coding
MET	Protein Coding
MMP14	Protein Coding
MSR1	Protein Coding
MXD1	Protein Coding
MYC	Protein Coding
NAMPT	Protein Coding
NDP	Protein Coding
NFKB1	Protein Coding
NFKBIA	Protein Coding
NLRP3	Protein Coding
NMI	Protein Coding
NMUR1	Protein Coding
NOD2	Protein Coding
NPFFR2	Protein Coding
OLR1	Protein Coding
OPRK1	Protein Coding
OSM	Protein Coding
OSMR	Protein Coding
P2RX4	Protein Coding
P2RX7	Protein Coding
P2RY2	Protein Coding
PCDH7	Protein Coding
PDE4B	Protein Coding
PDPN	Protein Coding
PIK3R5	Protein Coding
PLAUR	Protein Coding
PROK2	Protein Coding
PSEN1	Protein Coding
PTAFR	Protein Coding
PTGER2	Protein Coding
PTGER4	Protein Coding
PTGIR	Protein Coding
PTPRE	Protein Coding
PVR	Protein Coding
RAF1	Protein Coding
RASGRP1	Protein Coding
RELA	Protein Coding
RGS1	Protein Coding
RGS16	Protein Coding
RHOG	Protein Coding
RIPK2	Protein Coding
RNF144B	Protein Coding
ROS1	Protein Coding
RTP4	Protein Coding
SCARF1	Protein Coding
SCN1B	Protein Coding
SELE	Protein Coding
SELENOS	Protein Coding
SELL	Protein Coding
SEMA4D	Protein Coding
SERPINE1	Protein Coding
SGMS2	Protein Coding
SLAMF1	Protein Coding
SLC11A2	Protein Coding
SLC1A2	Protein Coding
SLC28A2	Protein Coding
SLC31A1	Protein Coding
SLC31A2	Protein Coding
SLC4A4	Protein Coding
SLC7A1	Protein Coding
SLC7A2	Protein Coding
SPHK1	Protein Coding
SRI	Protein Coding
STAB1	Protein Coding
TACR1	Protein Coding
TACR3	Protein Coding
TAPBP	Protein Coding
TIMP1	Protein Coding
TLR1	Protein Coding
TLR2	Protein Coding
TLR3	Protein Coding
TNFAIP6	Protein Coding
TNFRSF1B	Protein Coding
TNFRSF9	Protein Coding
TNFSF10	Protein Coding
TNFSF15	Protein Coding
TNFSF9	Protein Coding
TPBG	Protein Coding
VIP	Protein Coding

## Sheet: Table S5
Supplementary Table 5: IRRGs significantly related to OS of PDAC patients in the E-MATB-6134 cohort
Gene	HR	HR.95L	HR.95H	pvalue
ADM	1.54656	1.34784	1.77458	5.1703e-10
TREM1	1.60056	1.34876	1.89937	7.20912e-08
EREG	1.40086	1.23053	1.59477	3.4648e-07
HMOX1	1.70368	1.38368	2.09769	5.18586e-07
UNC13D	1.91953	1.48247	2.48545	7.55433e-07
NT5E	1.53463	1.29333	1.82094	9.24919e-07
MIF	2.29809	1.61963	3.26076	3.14487e-06
DCBLD2	1.41417	1.21925	1.64024	4.6528e-06
ITGA5	1.54833	1.28277	1.86888	5.26683e-06
SPP1	1.39533	1.20866	1.61083	5.45872e-06
METRNL	1.91099	1.43425	2.54621	9.73509e-06
PPARD	2.2769	1.58089	3.27932	9.84944e-06
BTG2	0.687664	0.577406	0.818977	2.67266e-05
SPHK1	1.55844	1.25698	1.9322	5.22778e-05
ITGB3	1.59627	1.26678	2.01145	7.34546e-05
MAPK13	1.76471	1.32159	2.35639	0.000118085
MMP14	1.50425	1.21446	1.8632	0.00018436
HRH1	1.61147	1.25239	2.07351	0.000207528
GNA15	1.65905	1.26527	2.1754	0.000250414
CCL22	0.715824	0.597732	0.857248	0.000278621
IL6	1.29698	1.1265	1.49326	0.000298552
NR1D2	0.557224	0.405282	0.766128	0.000318275
ACVR2A	0.710954	0.59011	0.856545	0.000331885
JAK2	0.609253	0.464174	0.799677	0.0003557
LYZ	0.77819	0.677775	0.893481	0.000373939
PTGER2	0.558372	0.404512	0.770753	0.000395291
CDO1	0.573617	0.419911	0.783587	0.000478792
FOXP1	0.586041	0.431962	0.795079	0.000596269
PTGES	1.58033	1.21554	2.0546	0.00063171
LOXL3	1.81514	1.2833	2.56739	0.000751848
SLC11A1	1.36766	1.1378	1.64394	0.000852622
RGS16	1.24349	1.094	1.41342	0.000853892
LIF	1.30899	1.11546	1.5361	0.000971626
CCR4	0.638774	0.489336	0.833849	0.000979734

## Sheet: Table S6
Supplementary Table 6: IRRGs significantly related to OS of PDAC patients in the PACA-AU cohort
Gene	HR	HR.95L	HR.95H	pvalue
DCBLD2	1.53866	1.32101	1.79218	3.07e-08
TGM2	1.49236	1.29052	1.72576	6.67e-08
UNC13D	1.444	1.25042	1.66756	5.65e-07
CD70	1.35124	1.19958	1.52209	7.21e-07
LYZ	0.810558	0.737794	0.890497	1.21e-05
MIF	2.20943	1.54047	3.16888	1.65e-05
IL1A	1.18429	1.09633	1.27931	1.74e-05
IRAK2	1.53559	1.25008	1.8863	4.38e-05
ITGB1	2.38777	1.56587	3.64109	5.27e-05
ADM	1.28477	1.13454	1.45488	7.83e-05
TICAM2	1.75106	1.31979	2.32325	0.000103019
CEBPB	1.92153	1.37986	2.67583	0.000110768
BTG2	0.739969	0.634891	0.862439	0.000116285
ITGA5	1.35422	1.15822	1.58339	0.000143927
NAMPT	1.32737	1.14611	1.5373	0.000156598
HAS2	1.92575	1.37025	2.70647	0.000160637
EGFR	2.21185	1.44145	3.394	0.000279397
EBI3	0.797749	0.705252	0.902377	0.000326077
P2RY2	1.91823	1.34422	2.73736	0.000330098
LGALS9	0.740202	0.62704	0.873786	0.000379691
IL20RB	1.13654	1.05831	1.22055	0.000435382
GPSM3	0.743003	0.629221	0.87736	0.000460494
TREM1	1.19025	1.07843	1.31367	0.000540312
STAT5B	0.70524	0.577489	0.861252	0.000615151
SGMS2	1.34825	1.1361	1.60002	0.000624437
EREG	1.53805	1.20103	1.96964	0.000645923
MMP14	1.3162	1.12396	1.54132	0.000648416
IL33	0.689577	0.556604	0.854319	0.000672653
CCL14	0.79284	0.692156	0.90817	0.000807912
PTGER2	0.823678	0.73517	0.922842	0.000824601
TNFSF18	0.472428	0.304351	0.733324	0.000830195

## Sheet: Table S7
Supplementary Table 7: A total 354 compounds and their estimated AUC value of each sample in E-MTAB-6134 cohort
Drugs	PANC-1	PANC-10	PANC-100	PANC-101	PANC-102	PANC-103	PANC-104	PANC-105	PANC-106	PANC-107	PANC-11	PANC-110	PANC-111	PANC-112	PANC-113	PANC-114	PANC-115	PANC-116	PANC-117	PANC-118	PANC-119	PANC-12	PANC-120	PANC-121	PANC-122	PANC-123	PANC-124	PANC-125	PANC-126	PANC-127	PANC-128	PANC-129	PANC-13	PANC-130	PANC-131	PANC-132	PANC-134	PANC-135	PANC-136	PANC-137	PANC-138	PANC-139	PANC-14	PANC-140	PANC-141	PANC-142	PANC-143	PANC-144	PANC-145
BRD-K92856060	0.478735	0.467434	0.48655	0.483661	0.48539	0.474019	0.486139	0.479415	0.476624	0.463256	0.481583	0.481552	0.476743	0.479292	0.478795	0.470354	0.490002	0.473884	0.482736	0.487311	0.478397	0.491354	0.493146	0.487064	0.483567	0.471793	0.482113	0.471686	0.48057	0.478906	0.48398	0.479775	0.485045	0.46263	0.484618	0.47613	0.480377	0.4744	0.482483	0.484619	0.485086	0.483006	0.479855	0.472665	0.485938	0.494168	0.506417	0.478625	0.479051
B02	0.440196	0.441739	0.448661	0.444632	0.449679	0.44492	0.445216	0.443005	0.44696	0.443054	0.450298	0.44719	0.43999	0.446777	0.448769	0.441807	0.450591	0.44318	0.441575	0.44297	0.448547	0.444139	0.443071	0.455465	0.443491	0.442193	0.448193	0.419915	0.451124	0.450308	0.442597	0.449689	0.4471	0.433524	0.450988	0.445568	0.446302	0.445759	0.452438	0.45273	0.437976	0.451083	0.449282	0.438025	0.443357	0.449005	0.442452	0.437636	0.447441
BRD6340	0.480693	0.480694	0.481607	0.481321	0.481666	0.481367	0.48126	0.481126	0.481169	0.481104	0.481531	0.480679	0.480561	0.481706	0.480862	0.481907	0.481076	0.47982	0.481006	0.481045	0.48116	0.481215	0.480685	0.482426	0.48143	0.480515	0.481755	0.478268	0.481192	0.481715	0.479895	0.481713	0.481633	0.479725	0.481363	0.48148	0.481215	0.481287	0.480872	0.481449	0.480541	0.481434	0.481542	0.480635	0.48135	0.481694	0.479646	0.480056	0.480657
BRD-K45681478	0.450983	0.442087	0.455769	0.447919	0.442072	0.438588	0.450129	0.432854	0.452794	0.433505	0.449235	0.436396	0.445399	0.445338	0.448913	0.44762	0.446083	0.446766	0.457001	0.447718	0.450456	0.444362	0.4344	0.4583	0.441308	0.446433	0.444077	0.404499	0.458812	0.446855	0.433914	0.440523	0.445771	0.436963	0.453394	0.447088	0.452906	0.439403	0.442256	0.458011	0.42775	0.459021	0.442982	0.431304	0.440865	0.44237	0.446337	0.439586	0.460126
ML050	0.485888	0.48217	0.487365	0.484792	0.486237	0.485613	0.486975	0.485795	0.484546	0.483752	0.485189	0.483559	0.481578	0.485523	0.486258	0.483782	0.488121	0.486412	0.484373	0.485347	0.484421	0.483666	0.486718	0.487337	0.48336	0.482494	0.486915	0.479709	0.488422	0.48593	0.483206	0.486931	0.484076	0.481505	0.48799	0.486764	0.484517	0.485061	0.484505	0.486141	0.479622	0.485863	0.486674	0.482326	0.484977	0.484548	0.485988	0.48592	0.484543
ML162	0.319042	0.286481	0.351387	0.307262	0.325145	0.27798	0.316988	0.305452	0.2937	0.261146	0.353841	0.285954	0.364888	0.292164	0.303304	0.340056	0.337004	0.274956	0.324955	0.31005	0.308268	0.323218	0.346504	0.332435	0.330629	0.296454	0.296832	0.26867	0.333705	0.321314	0.273755	0.305663	0.318867	0.26363	0.340757	0.329818	0.314377	0.310806	0.366393	0.32368	0.324983	0.32078	0.309321	0.284842	0.34175	0.315299	0.338454	0.302694	0.294182
ML006	0.471278	0.47421	0.475113	0.477158	0.476797	0.476292	0.474876	0.47693	0.474964	0.476383	0.474922	0.475282	0.474122	0.476412	0.475024	0.472706	0.476702	0.472909	0.472366	0.475964	0.47259	0.475597	0.473661	0.478483	0.476394	0.473106	0.474856	0.468118	0.474495	0.475888	0.478067	0.475017	0.475187	0.471176	0.475402	0.474851	0.473961	0.474781	0.47288	0.475231	0.471448	0.471163	0.47521	0.473241	0.475591	0.474203	0.469628	0.47218	0.475624
NSC30930	0.489208	0.488343	0.488113	0.489148	0.486707	0.486004	0.486875	0.48875	0.487562	0.487583	0.487631	0.489054	0.49206	0.487283	0.488397	0.490242	0.489297	0.487093	0.489522	0.488221	0.487435	0.488943	0.491722	0.4883	0.488591	0.487008	0.486536	0.492197	0.489162	0.487988	0.487918	0.486992	0.489847	0.486188	0.488982	0.488752	0.487239	0.48828	0.490247	0.488705	0.489672	0.489995	0.487255	0.488104	0.488132	0.487833	0.492829	0.486829	0.487353
Bax channel blocker	0.457641	0.458963	0.462691	0.461858	0.462891	0.46062	0.463595	0.457811	0.460766	0.460698	0.459484	0.460123	0.456278	0.462327	0.457937	0.463764	0.457167	0.460464	0.461755	0.46167	0.45932	0.459953	0.454176	0.465651	0.457916	0.457654	0.465184	0.451932	0.461849	0.461373	0.456098	0.462997	0.462441	0.456756	0.463446	0.458212	0.459545	0.458533	0.46497	0.463131	0.453715	0.464775	0.459745	0.456727	0.462524	0.462268	0.454738	0.458931	0.458589
MI-1	0.497448	0.498008	0.497944	0.497125	0.49841	0.499116	0.497556	0.497719	0.498143	0.498511	0.497004	0.497492	0.496638	0.497671	0.497141	0.497772	0.496638	0.498288	0.497311	0.498138	0.49825	0.49763	0.496124	0.497906	0.496954	0.498678	0.498017	0.498766	0.497749	0.497891	0.497651	0.498153	0.497336	0.49954	0.4974	0.498442	0.497832	0.498713	0.497859	0.497336	0.496011	0.497627	0.49823	0.498525	0.498562	0.497696	0.494604	0.498927	0.497761
BRD9876	0.457353	0.460974	0.466104	0.463733	0.465443	0.462984	0.461804	0.465118	0.465445	0.461056	0.465473	0.465477	0.457403	0.465595	0.464655	0.462653	0.462514	0.460072	0.462079	0.461475	0.464581	0.46224	0.459151	0.470362	0.461893	0.459783	0.466841	0.449014	0.464633	0.463548	0.46141	0.465605	0.465599	0.456963	0.464396	0.462433	0.461349	0.466037	0.465466	0.4687	0.457412	0.465732	0.466446	0.460367	0.461291	0.466029	0.45381	0.459121	0.461322
DBeQ	0.403405	0.402883	0.408761	0.406505	0.403531	0.403691	0.406369	0.402269	0.406543	0.402205	0.414598	0.408165	0.407807	0.411247	0.411694	0.410451	0.403354	0.40073	0.402629	0.406893	0.408301	0.401255	0.405427	0.413469	0.401998	0.401135	0.403688	0.397505	0.407083	0.407145	0.398977	0.408239	0.407933	0.391029	0.410539	0.413642	0.400596	0.404979	0.415645	0.411089	0.399961	0.414441	0.40059	0.398706	0.403068	0.401043	0.408874	0.396848	0.404692
Mdivi-1	0.473407	0.473735	0.475931	0.47712	0.475779	0.474571	0.471554	0.474604	0.475749	0.475924	0.47471	0.474901	0.474855	0.475211	0.475144	0.473655	0.474444	0.470224	0.474868	0.474349	0.475146	0.474236	0.473139	0.477411	0.473984	0.473911	0.476033	0.470721	0.4736	0.475813	0.47175	0.476167	0.477318	0.472206	0.476592	0.474919	0.474221	0.475595	0.477526	0.475916	0.472515	0.476102	0.475134	0.474602	0.476254	0.475383	0.467938	0.47316	0.47246
tretinoin	0.472281	0.469424	0.477512	0.466446	0.469971	0.462611	0.455499	0.47199	0.462032	0.45216	0.476009	0.467125	0.48214	0.476869	0.464126	0.481136	0.475205	0.453203	0.471077	0.462559	0.465892	0.474675	0.483144	0.47879	0.469085	0.464463	0.468351	0.451217	0.473951	0.476823	0.462922	0.467929	0.482431	0.441396	0.474228	0.475855	0.469716	0.463954	0.479324	0.477117	0.465759	0.481156	0.465922	0.4591	0.47631	0.468432	0.480974	0.450089	0.465084
betulinic acid	0.497839	0.499693	0.49869	0.503238	0.497854	0.498266	0.494991	0.499449	0.50047	0.500071	0.500068	0.500966	0.502855	0.497658	0.498214	0.494648	0.497771	0.496845	0.496681	0.498922	0.500072	0.496687	0.499878	0.5014	0.500346	0.496691	0.499182	0.499901	0.496819	0.498897	0.499856	0.499259	0.498363	0.497659	0.502999	0.498946	0.497265	0.497273	0.503597	0.499967	0.499061	0.494678	0.496733	0.497958	0.499676	0.50011	0.49337	0.498503	0.500552
phloretin	0.453547	0.455797	0.461577	0.461371	0.463156	0.4606	0.456355	0.459728	0.464641	0.457105	0.46657	0.460566	0.460877	0.462908	0.463185	0.454044	0.464409	0.457481	0.455631	0.459077	0.460084	0.459209	0.45528	0.46535	0.455808	0.453977	0.457534	0.449221	0.45654	0.461077	0.452545	0.464393	0.46308	0.449834	0.461613	0.457958	0.460798	0.460247	0.461926	0.461323	0.453053	0.459175	0.464495	0.453675	0.455907	0.459761	0.450795	0.451071	0.456597
gossypol	0.432762	0.435848	0.446104	0.439681	0.442613	0.443323	0.439369	0.446429	0.445813	0.438749	0.446294	0.440637	0.445496	0.44255	0.445451	0.437146	0.443109	0.432902	0.439161	0.442622	0.449023	0.442034	0.434308	0.452316	0.431563	0.434713	0.442051	0.444278	0.438525	0.438988	0.43744	0.445941	0.451056	0.432528	0.443192	0.449323	0.43803	0.446857	0.454345	0.440162	0.427328	0.444412	0.446712	0.443437	0.444884	0.440631	0.425965	0.440305	0.433981
chlorambucil	0.452644	0.457106	0.466709	0.466522	0.456863	0.451494	0.454436	0.454832	0.462123	0.459251	0.460898	0.469465	0.462758	0.461823	0.463281	0.462349	0.464959	0.456259	0.45447	0.458956	0.457206	0.454703	0.456271	0.482108	0.466293	0.448566	0.476271	0.450785	0.464285	0.453953	0.463874	0.459455	0.466635	0.443128	0.46881	0.456789	0.457383	0.448764	0.474571	0.468294	0.467061	0.473141	0.445021	0.446571	0.449822	0.459948	0.466889	0.436919	0.455559
fluorouracil	0.446354	0.449216	0.465818	0.452274	0.447934	0.459882	0.440132	0.446797	0.463625	0.467844	0.434358	0.447169	0.444547	0.473368	0.449892	0.45163	0.453271	0.445203	0.433492	0.450747	0.458123	0.44747	0.431793	0.482128	0.437979	0.444402	0.468157	0.453234	0.468635	0.458254	0.466055	0.460144	0.452099	0.444979	0.453314	0.461861	0.445772	0.45687	0.448274	0.459232	0.443455	0.469915	0.45839	0.447805	0.453144	0.466318	0.434	0.453049	0.446344
ML083	0.491601	0.490184	0.4905	0.490553	0.490655	0.490319	0.49204	0.490819	0.488824	0.489708	0.490995	0.491041	0.491445	0.490436	0.490042	0.49274	0.492073	0.490351	0.490594	0.490474	0.488931	0.490113	0.494209	0.491006	0.492348	0.489146	0.49066	0.491655	0.491268	0.490577	0.49125	0.490441	0.491857	0.489363	0.491176	0.492423	0.489436	0.489828	0.49296	0.48975	0.49209	0.491366	0.489481	0.489532	0.490264	0.489705	0.49932	0.489858	0.490229
CID-5951923	0.497905	0.498516	0.496246	0.498485	0.498407	0.494745	0.499005	0.499272	0.497762	0.496794	0.49825	0.497684	0.502601	0.499	0.498293	0.497199	0.498836	0.49552	0.501185	0.497009	0.497105	0.501458	0.50243	0.500627	0.498521	0.494637	0.494406	0.498303	0.499941	0.499852	0.497567	0.497221	0.501068	0.492997	0.497155	0.499658	0.497381	0.49839	0.497991	0.498618	0.499871	0.498062	0.499056	0.498665	0.499723	0.498675	0.497754	0.494347	0.496901
azacitidine	0.492068	0.492379	0.493015	0.492712	0.493692	0.493468	0.492235	0.493301	0.493855	0.494063	0.492269	0.488348	0.489967	0.495244	0.492556	0.494636	0.489121	0.482743	0.4958	0.490682	0.494942	0.494712	0.488087	0.494515	0.490894	0.492638	0.492733	0.477589	0.49448	0.49364	0.484082	0.49372	0.494726	0.487785	0.49385	0.493842	0.49308	0.494257	0.487071	0.49342	0.495018	0.496578	0.497407	0.493795	0.493804	0.495252	0.479401	0.48763	0.490114
trifluoperazine	0.473507	0.471885	0.47286	0.47041	0.474338	0.474956	0.475927	0.470973	0.47158	0.475054	0.468595	0.471485	0.471909	0.472068	0.468643	0.479351	0.470329	0.46926	0.473476	0.47434	0.46964	0.473385	0.468979	0.475742	0.468755	0.474163	0.469732	0.470155	0.474352	0.475347	0.47073	0.474241	0.472851	0.471894	0.47218	0.478984	0.47247	0.477207	0.474581	0.474141	0.467991	0.480356	0.469622	0.473336	0.478057	0.471774	0.46487	0.471404	0.471662
paclitaxel	0.229818	0.289206	0.274823	0.212942	0.260916	0.268672	0.197656	0.22999	0.274188	0.268956	0.244307	0.291514	0.226267	0.296276	0.264092	0.285837	0.270332	0.236705	0.228696	0.277615	0.244169	0.244174	0.167381	0.262705	0.181527	0.266661	0.256762	0.169176	0.267855	0.269529	0.228399	0.221581	0.242882	0.205076	0.212173	0.276795	0.284016	0.273216	0.300256	0.257048	0.187798	0.268254	0.244068	0.24605	0.259359	0.248591	0.176312	0.204141	0.225829
tamoxifen	0.470232	0.466353	0.471591	0.469799	0.470062	0.470023	0.471225	0.468924	0.467058	0.466113	0.472228	0.468534	0.466944	0.468157	0.469324	0.479132	0.46769	0.466075	0.467862	0.469431	0.467626	0.46806	0.472505	0.471514	0.47417	0.46712	0.470256	0.46355	0.468313	0.469858	0.467622	0.471884	0.469702	0.466929	0.471418	0.475018	0.466279	0.469088	0.470659	0.470337	0.468634	0.469521	0.466518	0.467696	0.468849	0.468937	0.474446	0.468933	0.467816
IU1	0.484931	0.485176	0.486014	0.486054	0.486017	0.485063	0.485409	0.485433	0.486085	0.485789	0.485518	0.486034	0.485468	0.486522	0.485828	0.485629	0.485409	0.485712	0.485993	0.485548	0.485805	0.485476	0.485188	0.486436	0.484691	0.484775	0.486222	0.486345	0.485614	0.485781	0.484775	0.485566	0.486646	0.484772	0.4861	0.485362	0.485136	0.486074	0.486703	0.485974	0.483977	0.486312	0.485525	0.485205	0.485672	0.485344	0.484394	0.485156	0.484754
dexamethasone	0.495035	0.491498	0.499317	0.499903	0.501425	0.497508	0.4993	0.500606	0.497361	0.493484	0.504972	0.494653	0.496331	0.498971	0.500822	0.496206	0.50275	0.502605	0.495579	0.491399	0.501574	0.504214	0.502263	0.505118	0.496569	0.49447	0.502328	0.486049	0.507605	0.49978	0.495444	0.499736	0.493849	0.489313	0.504391	0.503228	0.49397	0.495465	0.499697	0.500204	0.490044	0.501951	0.50285	0.494214	0.499037	0.496791	0.512083	0.501527	0.497764
sildenafil	0.48092	0.479388	0.480015	0.480676	0.481013	0.481048	0.483083	0.47986	0.478454	0.479885	0.479528	0.480051	0.478838	0.479737	0.478779	0.483476	0.480484	0.480663	0.479727	0.480174	0.478626	0.479191	0.481995	0.479942	0.480997	0.479592	0.480796	0.480651	0.481214	0.479876	0.481917	0.480866	0.479974	0.480872	0.480421	0.483409	0.478781	0.48039	0.480451	0.47884	0.48044	0.482626	0.478362	0.479573	0.479952	0.478769	0.485098	0.480964	0.480314
simvastatin	0.440428	0.442564	0.435296	0.443555	0.444622	0.438753	0.440912	0.439944	0.44374	0.434908	0.449806	0.444192	0.434622	0.440743	0.442062	0.428422	0.447203	0.456519	0.436686	0.441897	0.442352	0.440185	0.446928	0.434746	0.442998	0.441249	0.443804	0.444968	0.443986	0.439938	0.450112	0.435463	0.436328	0.440723	0.445656	0.435241	0.439708	0.438314	0.442001	0.436749	0.443125	0.43786	0.4366	0.435452	0.436791	0.438522	0.456468	0.441314	0.447369
parbendazole	0.324659	0.353759	0.356788	0.336584	0.355035	0.348845	0.32798	0.334875	0.35438	0.35964	0.339389	0.373318	0.321091	0.366604	0.343752	0.359875	0.371319	0.34684	0.328485	0.353534	0.343928	0.343843	0.319483	0.383811	0.316639	0.333242	0.362982	0.268114	0.385188	0.351136	0.356466	0.342584	0.349351	0.30154	0.334734	0.350533	0.350967	0.337986	0.378224	0.362013	0.317714	0.378683	0.357137	0.314645	0.339663	0.358201	0.313278	0.305346	0.346186
procarbazine	0.507339	0.508707	0.504899	0.506534	0.507977	0.511314	0.513728	0.508283	0.506765	0.510289	0.502379	0.507908	0.501531	0.506987	0.504656	0.504581	0.509583	0.513282	0.503484	0.50835	0.505527	0.506306	0.504916	0.507099	0.508934	0.507813	0.508089	0.511919	0.505323	0.50457	0.51519	0.507523	0.504186	0.513326	0.503433	0.506386	0.505004	0.507199	0.500529	0.503694	0.505137	0.502291	0.506925	0.507409	0.505255	0.507335	0.505482	0.510875	0.507042
curcumin	0.394422	0.408212	0.399527	0.396678	0.406239	0.405671	0.390793	0.395388	0.409104	0.402281	0.410922	0.408561	0.395447	0.402334	0.406625	0.406134	0.412727	0.409287	0.389141	0.411812	0.407339	0.403542	0.393411	0.40507	0.396976	0.401738	0.39873	0.386355	0.408368	0.403906	0.405848	0.403317	0.400806	0.397272	0.395189	0.389557	0.404099	0.396937	0.404334	0.410052	0.407451	0.395254	0.401362	0.398435	0.394098	0.400003	0.402137	0.393541	0.412641
ciclopirox	0.402381	0.410236	0.414624	0.411641	0.418772	0.416339	0.41699	0.41011	0.417862	0.417582	0.408157	0.41595	0.395505	0.416807	0.413111	0.411687	0.416957	0.410022	0.407507	0.411829	0.413965	0.418718	0.3977	0.430792	0.40127	0.405717	0.421024	0.384312	0.419066	0.407229	0.412666	0.413114	0.41498	0.401571	0.412144	0.414289	0.409283	0.409444	0.413917	0.41713	0.408614	0.43278	0.419667	0.409801	0.408449	0.412794	0.39405	0.404059	0.405591
epigallocatechin-3-monogallate	0.45625	0.449828	0.458484	0.461752	0.456815	0.454995	0.46449	0.451071	0.451777	0.453966	0.450536	0.450655	0.450346	0.45141	0.44253	0.45706	0.462163	0.454154	0.44803	0.45389	0.445403	0.452215	0.462815	0.458964	0.460139	0.450234	0.461169	0.438792	0.457842	0.458549	0.458239	0.463576	0.459133	0.448019	0.45867	0.456977	0.448388	0.455816	0.455162	0.458705	0.445007	0.460754	0.449001	0.444354	0.451991	0.455591	0.449935	0.454371	0.452716
ML311	0.404593	0.412018	0.424041	0.413837	0.416654	0.421293	0.407516	0.406855	0.42385	0.421744	0.415822	0.419921	0.408526	0.422472	0.417985	0.415148	0.420937	0.401911	0.410528	0.419782	0.416296	0.410852	0.400061	0.430964	0.39811	0.4054	0.427659	0.378634	0.425657	0.414353	0.396877	0.420141	0.418983	0.389603	0.408844	0.417945	0.415043	0.408511	0.434383	0.417714	0.39969	0.435302	0.415699	0.404562	0.411607	0.420537	0.387088	0.398129	0.408195
myricetin	0.504889	0.503353	0.506177	0.505876	0.506128	0.505591	0.506481	0.50581	0.505515	0.504838	0.507279	0.504749	0.504799	0.50738	0.505153	0.50514	0.506592	0.505066	0.504849	0.504299	0.505879	0.505653	0.506541	0.507357	0.506934	0.504967	0.506288	0.49932	0.505888	0.506197	0.505242	0.507142	0.505384	0.504064	0.506468	0.505853	0.504302	0.506043	0.504246	0.506841	0.504726	0.506031	0.506805	0.503892	0.504895	0.507351	0.506973	0.506195	0.505329
methotrexate	0.256274	0.331939	0.302847	0.281046	0.345438	0.299718	0.269006	0.313506	0.321542	0.32942	0.310069	0.346678	0.26434	0.342065	0.298856	0.223037	0.31383	0.31458	0.288397	0.287183	0.339629	0.319668	0.28175	0.346109	0.255443	0.297053	0.341086	0.216874	0.280795	0.298625	0.309097	0.315388	0.280891	0.275052	0.261701	0.250578	0.311515	0.301017	0.294783	0.287177	0.289559	0.270284	0.379738	0.29564	0.303599	0.329167	0.161843	0.304571	0.306396
lovastatin	0.394187	0.397175	0.396848	0.406625	0.404616	0.39072	0.384814	0.407277	0.403571	0.391661	0.414871	0.409427	0.40221	0.402126	0.407671	0.386356	0.408515	0.415307	0.395112	0.396128	0.40039	0.398041	0.409459	0.399398	0.395874	0.399447	0.403098	0.405081	0.401761	0.399676	0.413524	0.379952	0.401627	0.384614	0.410199	0.391231	0.39291	0.39433	0.42407	0.402557	0.399578	0.402308	0.386405	0.389744	0.394175	0.388531	0.439375	0.392604	0.405526
valdecoxib	0.432462	0.434031	0.442804	0.441787	0.445101	0.445418	0.441745	0.440321	0.444507	0.442239	0.439863	0.436091	0.432723	0.443814	0.44002	0.434947	0.438904	0.437981	0.437161	0.441211	0.443539	0.437761	0.433579	0.444693	0.436112	0.439017	0.445934	0.424564	0.439528	0.440296	0.434103	0.445705	0.437287	0.439159	0.439372	0.437456	0.439393	0.442971	0.439487	0.437931	0.428635	0.442476	0.445643	0.436831	0.439009	0.438891	0.428416	0.438777	0.437545
dacarbazine	0.478672	0.482435	0.480212	0.47736	0.478429	0.473996	0.475862	0.476747	0.484275	0.481718	0.474698	0.479322	0.493345	0.488487	0.476834	0.473684	0.488039	0.476636	0.482554	0.478794	0.480949	0.484464	0.479817	0.4851	0.475627	0.475665	0.477877	0.488186	0.476529	0.479422	0.483951	0.482445	0.48369	0.469172	0.48261	0.4799	0.481716	0.475594	0.486726	0.481454	0.475279	0.481269	0.479999	0.474511	0.481497	0.483307	0.470419	0.476441	0.475581
niclosamide	0.381388	0.383606	0.386117	0.41056	0.398532	0.381884	0.39983	0.401522	0.393268	0.375774	0.41558	0.413149	0.389924	0.401373	0.406773	0.386821	0.425953	0.387083	0.380224	0.394922	0.393431	0.393336	0.400356	0.393862	0.404672	0.376082	0.382844	0.376912	0.385697	0.390883	0.415296	0.393308	0.414924	0.359754	0.414901	0.379001	0.398483	0.392197	0.385582	0.409958	0.40841	0.368038	0.39726	0.385428	0.393505	0.403263	0.424654	0.378167	0.386026
prochlorperazine	0.449741	0.446264	0.44977	0.45052	0.448576	0.44855	0.451575	0.448042	0.446637	0.453286	0.446566	0.450281	0.448736	0.450692	0.447768	0.454137	0.448835	0.443889	0.449279	0.44758	0.443819	0.452112	0.44767	0.452918	0.446717	0.445579	0.448243	0.440674	0.449084	0.449993	0.449508	0.449513	0.453977	0.443449	0.449722	0.451425	0.445214	0.449894	0.454409	0.451383	0.446334	0.45148	0.447617	0.446611	0.453164	0.449077	0.449655	0.445278	0.446729
imatinib	0.473752	0.474102	0.474086	0.475103	0.474586	0.473373	0.474903	0.474362	0.474128	0.474074	0.474296	0.4747	0.474153	0.474819	0.474706	0.473377	0.474851	0.474406	0.474069	0.474041	0.474114	0.474266	0.474493	0.475285	0.474107	0.473137	0.474395	0.473237	0.474256	0.474125	0.475014	0.474254	0.47501	0.472616	0.474488	0.47354	0.47399	0.474024	0.474669	0.475118	0.474031	0.474798	0.474411	0.473412	0.473903	0.474311	0.473981	0.472978	0.474034
decitabine	0.460379	0.469693	0.479585	0.466524	0.477824	0.47533	0.465595	0.466463	0.471915	0.472107	0.466204	0.468419	0.458761	0.473902	0.461128	0.461905	0.472059	0.466473	0.466166	0.471694	0.475277	0.471736	0.452843	0.487662	0.46248	0.468549	0.484161	0.445409	0.483895	0.47652	0.458179	0.477042	0.479062	0.463053	0.472713	0.468609	0.473464	0.469346	0.469917	0.475307	0.461598	0.479154	0.47616	0.464059	0.475592	0.48112	0.445505	0.464204	0.468394
CHIR-99021	0.474665	0.477278	0.476964	0.471884	0.481852	0.480093	0.484255	0.471141	0.467422	0.472585	0.474035	0.478485	0.476335	0.477479	0.473879	0.477224	0.479159	0.485581	0.467911	0.472437	0.472208	0.471043	0.476763	0.475484	0.475311	0.47853	0.473196	0.466221	0.48544	0.480086	0.491399	0.476929	0.472791	0.471265	0.47389	0.484092	0.471946	0.472351	0.475776	0.47341	0.470859	0.479979	0.46675	0.465528	0.47403	0.467956	0.49028	0.473918	0.478384
BI-2536	0.214992	0.267355	0.266289	0.249225	0.26968	0.268198	0.25805	0.258195	0.260043	0.27896	0.249877	0.290187	0.223448	0.316901	0.265201	0.249475	0.289574	0.261269	0.240452	0.242364	0.257156	0.240767	0.19154	0.291736	0.22573	0.238733	0.312561	0.175129	0.260481	0.270174	0.265086	0.275657	0.264865	0.224419	0.247599	0.261761	0.258417	0.267185	0.262971	0.271508	0.191778	0.272253	0.257	0.219759	0.239091	0.27274	0.185954	0.230195	0.228374
BRD-K61166597	0.435165	0.439788	0.436954	0.436875	0.446915	0.439819	0.437712	0.436794	0.442344	0.433146	0.442672	0.454847	0.4399	0.451369	0.43355	0.452832	0.441373	0.430207	0.436154	0.446858	0.441218	0.443044	0.430872	0.444713	0.429423	0.445607	0.442211	0.394466	0.437009	0.431788	0.422093	0.432744	0.433047	0.433677	0.427345	0.418106	0.450225	0.426604	0.431648	0.443239	0.434605	0.441267	0.433088	0.434694	0.436285	0.429278	0.421937	0.418497	0.447871
axitinib	0.430061	0.426627	0.449456	0.43294	0.426633	0.419806	0.435906	0.424714	0.430296	0.420976	0.422245	0.431127	0.443938	0.434099	0.438564	0.433078	0.439226	0.426464	0.422515	0.432879	0.422341	0.424096	0.445283	0.44982	0.428488	0.414095	0.436201	0.413158	0.438878	0.437021	0.432938	0.42769	0.448714	0.397701	0.434086	0.437954	0.428093	0.426814	0.455571	0.44508	0.416751	0.442233	0.422248	0.411669	0.425659	0.436012	0.415714	0.412902	0.431402
selumetinib	0.384179	0.403876	0.383765	0.377025	0.355718	0.403276	0.363615	0.367098	0.385981	0.423847	0.313869	0.349929	0.393951	0.377438	0.349118	0.363922	0.377179	0.35621	0.37612	0.367278	0.370305	0.382725	0.320721	0.364893	0.37229	0.398289	0.371659	0.432449	0.39841	0.380516	0.421818	0.36406	0.367032	0.402844	0.38653	0.439713	0.352579	0.404971	0.356394	0.375649	0.357218	0.388411	0.36826	0.395563	0.408192	0.400482	0.318801	0.387724	0.380939
GW-843682X	0.426742	0.440809	0.446015	0.435763	0.434489	0.443496	0.415356	0.424502	0.444705	0.447065	0.436264	0.453202	0.42332	0.457993	0.441199	0.436108	0.43977	0.417364	0.42545	0.438628	0.446704	0.428536	0.408761	0.447741	0.426102	0.436191	0.463713	0.385547	0.439459	0.442824	0.411675	0.445911	0.437624	0.422427	0.437	0.433753	0.431154	0.435493	0.44581	0.448126	0.423037	0.446471	0.438007	0.430808	0.434059	0.444411	0.402261	0.412269	0.424497
vandetanib	0.411569	0.420608	0.417793	0.405387	0.418926	0.419397	0.40173	0.410252	0.408794	0.414393	0.4246	0.414805	0.41031	0.409324	0.419293	0.436826	0.396808	0.417236	0.405393	0.405593	0.406043	0.420294	0.406771	0.404292	0.403057	0.425728	0.41921	0.378416	0.42794	0.418287	0.411975	0.409117	0.40465	0.413547	0.426551	0.436392	0.398609	0.412619	0.438469	0.421895	0.402421	0.398422	0.406017	0.409163	0.414439	0.396524	0.443707	0.415211	0.416148
sorafenib	0.419765	0.423092	0.429739	0.434232	0.430473	0.419786	0.425159	0.426154	0.428517	0.423765	0.434419	0.426139	0.426464	0.434048	0.434403	0.415006	0.430901	0.419839	0.427319	0.42528	0.429952	0.425648	0.425981	0.437287	0.424467	0.416972	0.433715	0.404453	0.426546	0.427648	0.421154	0.428349	0.432148	0.409237	0.430561	0.428087	0.426305	0.424022	0.433197	0.432031	0.423549	0.431386	0.428315	0.41885	0.423561	0.42641	0.413954	0.418353	0.419945
ML029	0.479143	0.475965	0.477801	0.477036	0.481863	0.480302	0.484653	0.4781	0.479173	0.477663	0.474763	0.477292	0.481472	0.479672	0.474699	0.478925	0.479869	0.477969	0.476539	0.479397	0.476147	0.477368	0.478566	0.48228	0.47361	0.476786	0.476318	0.483246	0.479542	0.478872	0.479075	0.483794	0.479014	0.476887	0.479684	0.485565	0.473976	0.480784	0.482974	0.476644	0.470957	0.48325	0.477729	0.47614	0.482166	0.476115	0.46991	0.482148	0.475309
temozolomide	0.501107	0.500999	0.5017	0.501227	0.501571	0.500968	0.501305	0.501489	0.50114	0.500996	0.501488	0.501411	0.500997	0.501378	0.501107	0.501979	0.501257	0.500642	0.501561	0.501333	0.501238	0.501521	0.501757	0.501958	0.501543	0.500689	0.501483	0.499921	0.501375	0.501643	0.500966	0.501575	0.501632	0.50051	0.501423	0.501322	0.501363	0.501224	0.501145	0.501499	0.501371	0.500992	0.501303	0.501068	0.501389	0.501646	0.500989	0.500721	0.501172
BRD4132	0.435117	0.431725	0.443801	0.443133	0.443585	0.437763	0.436186	0.445508	0.439736	0.440796	0.447238	0.440878	0.442384	0.44323	0.442295	0.431134	0.446969	0.433108	0.435521	0.43672	0.442056	0.441735	0.443172	0.452056	0.44137	0.429884	0.447902	0.417101	0.443845	0.442745	0.439356	0.442098	0.445742	0.42577	0.446267	0.439818	0.438084	0.439006	0.443997	0.442908	0.440625	0.442317	0.450064	0.432486	0.44137	0.441561	0.441911	0.432881	0.435159
SNX-2112	0.292289	0.33668	0.339862	0.319095	0.348119	0.337992	0.317793	0.304313	0.340257	0.3352	0.326782	0.354982	0.337845	0.346496	0.315031	0.307025	0.319084	0.329619	0.306209	0.320254	0.349869	0.314488	0.284817	0.349696	0.338012	0.319045	0.341372	0.257274	0.360552	0.330573	0.325638	0.317654	0.325431	0.291439	0.327218	0.344481	0.326222	0.312441	0.330689	0.32856	0.325406	0.319547	0.332704	0.307888	0.308931	0.342701	0.315151	0.291064	0.350381
navitoclax	0.443063	0.427182	0.45262	0.447236	0.440142	0.433755	0.420138	0.407145	0.442426	0.444053	0.449027	0.428014	0.466817	0.424736	0.431593	0.466477	0.418543	0.413791	0.433794	0.431046	0.439123	0.433507	0.431441	0.469286	0.44698	0.43754	0.423583	0.410384	0.445707	0.451961	0.379126	0.431721	0.449317	0.417866	0.449797	0.459235	0.424609	0.441078	0.480119	0.451486	0.409482	0.46724	0.419094	0.430103	0.446423	0.431132	0.4476	0.432782	0.435664
doxorubicin	0.246213	0.280382	0.286597	0.276819	0.269212	0.256063	0.271129	0.256081	0.285434	0.268858	0.280361	0.305367	0.267562	0.287876	0.273119	0.301178	0.296261	0.278321	0.259697	0.286815	0.269904	0.262157	0.264901	0.311392	0.26162	0.238607	0.311985	0.222048	0.332274	0.260234	0.307982	0.285143	0.283286	0.231681	0.283414	0.268268	0.273759	0.255084	0.316367	0.289805	0.26766	0.308007	0.265284	0.238593	0.258004	0.290395	0.288441	0.232933	0.290664
ouabain	0.174876	0.188113	0.193089	0.18302	0.224273	0.192031	0.220271	0.191992	0.183818	0.181217	0.227186	0.214393	0.183739	0.210948	0.203648	0.211548	0.236417	0.197872	0.176837	0.18285	0.179246	0.19512	0.223761	0.239947	0.175115	0.172198	0.211722	0.111411	0.225735	0.201457	0.211429	0.192442	0.201799	0.14729	0.194218	0.195885	0.17467	0.183772	0.205648	0.213295	0.1656	0.197336	0.214121	0.15255	0.16808	0.208179	0.226113	0.172202	0.184078
bexarotene	0.491364	0.491707	0.493673	0.49333	0.492821	0.493716	0.493754	0.497808	0.490269	0.490952	0.504939	0.497466	0.487112	0.497233	0.492981	0.488283	0.506001	0.493441	0.487112	0.48842	0.497577	0.489627	0.49714	0.50329	0.495666	0.484946	0.501151	0.469833	0.49682	0.493762	0.503536	0.498328	0.49251	0.47877	0.493965	0.490625	0.491534	0.490888	0.488676	0.498488	0.486686	0.500119	0.498565	0.482359	0.481625	0.49107	0.503774	0.4888	0.496257
nilotinib	0.474186	0.4646	0.479394	0.473387	0.470736	0.462678	0.475087	0.472699	0.467243	0.463981	0.48107	0.4746	0.480696	0.474117	0.473777	0.485387	0.473053	0.459248	0.477416	0.467285	0.468161	0.472163	0.483632	0.48179	0.477601	0.461811	0.474687	0.456222	0.474879	0.472674	0.464088	0.470606	0.47998	0.453522	0.480752	0.479349	0.466989	0.467052	0.481894	0.477626	0.475152	0.480587	0.46446	0.464212	0.474012	0.47164	0.482034	0.461053	0.469235
sunitinib	0.399735	0.396969	0.4058	0.402353	0.397306	0.386901	0.395145	0.394823	0.395432	0.394498	0.398926	0.397189	0.408281	0.405657	0.402252	0.400589	0.404909	0.393037	0.397526	0.39821	0.396533	0.403018	0.406553	0.407211	0.39828	0.38654	0.402804	0.384199	0.402875	0.402965	0.410601	0.395267	0.410373	0.376232	0.403828	0.400431	0.398984	0.391268	0.409499	0.409445	0.400235	0.404705	0.394694	0.385288	0.398571	0.40004	0.412845	0.3872	0.398698
bendamustine	0.480937	0.49376	0.480248	0.490842	0.489603	0.485787	0.497114	0.490047	0.489507	0.487232	0.490525	0.487904	0.484132	0.494262	0.4874	0.481707	0.497187	0.499853	0.483328	0.488215	0.485421	0.486335	0.490695	0.489122	0.493958	0.483212	0.488094	0.48023	0.490788	0.483383	0.498038	0.49109	0.488804	0.483089	0.481719	0.484263	0.491094	0.475772	0.487451	0.487671	0.483495	0.483668	0.484102	0.480681	0.47689	0.484663	0.501493	0.479666	0.495726
BRD9647	0.481976	0.482056	0.482345	0.482584	0.481958	0.480581	0.481383	0.481303	0.481462	0.480686	0.48379	0.482788	0.482788	0.482014	0.482934	0.481096	0.48289	0.482208	0.482143	0.481916	0.48162	0.482021	0.483813	0.481331	0.482282	0.481569	0.481391	0.482537	0.481368	0.481727	0.482802	0.481049	0.482038	0.480798	0.482499	0.481342	0.482351	0.481019	0.482889	0.482576	0.482845	0.481067	0.480416	0.48076	0.481289	0.481246	0.484464	0.480398	0.482182
CD-437	0.369355	0.405473	0.402064	0.396586	0.400397	0.402716	0.385791	0.395712	0.41697	0.395686	0.406382	0.403114	0.383485	0.41186	0.399752	0.396198	0.40146	0.401329	0.380573	0.39446	0.408861	0.386115	0.373228	0.422126	0.394853	0.386437	0.418214	0.362008	0.398675	0.399264	0.408527	0.403126	0.403617	0.373854	0.390669	0.386406	0.401963	0.392958	0.404272	0.413643	0.393173	0.407475	0.404371	0.37757	0.377821	0.408829	0.384193	0.369802	0.399901
SCH-79797	0.331046	0.341089	0.347462	0.344627	0.356538	0.345286	0.332674	0.341961	0.352373	0.35547	0.332894	0.347266	0.326463	0.352854	0.331293	0.334905	0.337928	0.335627	0.344111	0.335897	0.352681	0.343441	0.327834	0.368058	0.32424	0.339671	0.356714	0.315353	0.345302	0.354319	0.329634	0.352105	0.349875	0.328076	0.341793	0.339651	0.345966	0.347452	0.351814	0.346684	0.322298	0.34803	0.350901	0.341066	0.346267	0.345404	0.290649	0.33802	0.331611
LE-135	0.45602	0.459774	0.46078	0.460526	0.465769	0.461203	0.458652	0.459178	0.46436	0.4586	0.467671	0.461078	0.460707	0.466149	0.464358	0.457289	0.467795	0.461114	0.457385	0.459981	0.465108	0.461378	0.459714	0.466452	0.457482	0.457749	0.461024	0.443233	0.466586	0.461182	0.458794	0.461915	0.460872	0.452864	0.461397	0.461333	0.461761	0.458062	0.462796	0.463694	0.456849	0.458277	0.462016	0.455516	0.457102	0.460294	0.470387	0.454399	0.462428
SKI-II	0.48394	0.48359	0.488626	0.486622	0.488095	0.484149	0.486457	0.486734	0.485084	0.482164	0.486453	0.485972	0.485265	0.487869	0.484077	0.488602	0.488791	0.48582	0.484012	0.48355	0.484358	0.486531	0.488146	0.488812	0.486432	0.483542	0.486529	0.483343	0.486931	0.486584	0.488005	0.487193	0.487574	0.481007	0.487661	0.487789	0.484394	0.487125	0.487725	0.488274	0.481399	0.488755	0.484338	0.482248	0.485241	0.485139	0.491629	0.483973	0.485431
CI-976	0.477546	0.479477	0.479584	0.48076	0.480067	0.475697	0.476047	0.479433	0.480634	0.477399	0.485715	0.481579	0.477117	0.480404	0.483164	0.478611	0.478431	0.478654	0.479792	0.478491	0.483944	0.478165	0.478897	0.481888	0.480154	0.476115	0.483536	0.468993	0.481564	0.481139	0.478039	0.482449	0.477461	0.474967	0.481929	0.479414	0.478232	0.478875	0.485204	0.484471	0.480223	0.480848	0.479397	0.475737	0.47676	0.482659	0.47716	0.478107	0.47977
necrostatin-1	0.471459	0.470431	0.471209	0.472062	0.474985	0.474084	0.474131	0.471549	0.468569	0.470817	0.471947	0.471644	0.464628	0.471538	0.471933	0.471246	0.472683	0.471349	0.468319	0.470146	0.471119	0.465316	0.47235	0.468036	0.468914	0.468463	0.472107	0.469146	0.469265	0.470382	0.468907	0.473243	0.471019	0.472418	0.475843	0.471184	0.468259	0.472545	0.469305	0.468733	0.466185	0.46928	0.468852	0.470306	0.471071	0.465123	0.471247	0.471795	0.469582
GW-405833	0.446918	0.446814	0.45657	0.450215	0.451844	0.447709	0.443947	0.448422	0.450125	0.451332	0.446817	0.448142	0.45496	0.451489	0.44992	0.452616	0.438995	0.439356	0.453787	0.4502	0.449102	0.453982	0.435677	0.456005	0.437981	0.450397	0.448836	0.442904	0.44994	0.453175	0.441436	0.451005	0.455408	0.444455	0.453234	0.454354	0.450187	0.454473	0.461525	0.453942	0.439696	0.453769	0.445852	0.450729	0.458386	0.448414	0.423972	0.446412	0.445111
AC55649	0.491588	0.491532	0.49185	0.491585	0.491453	0.489122	0.49027	0.492169	0.490602	0.48929	0.491373	0.492451	0.492998	0.491551	0.491801	0.491192	0.492892	0.490678	0.492615	0.491276	0.488802	0.492325	0.493089	0.491893	0.492325	0.489523	0.491195	0.491531	0.49174	0.491287	0.490899	0.48963	0.493555	0.487226	0.491611	0.490211	0.49236	0.490014	0.49257	0.491796	0.492126	0.489129	0.48973	0.490034	0.491429	0.490268	0.492244	0.487997	0.491051
RITA	0.387228	0.397535	0.429487	0.465693	0.434527	0.41592	0.466271	0.420992	0.42711	0.418791	0.418488	0.407072	0.441945	0.446437	0.391152	0.443426	0.432221	0.395384	0.391936	0.404704	0.42989	0.454961	0.404725	0.505659	0.362491	0.398642	0.496503	0.419959	0.506956	0.381868	0.446533	0.44309	0.392818	0.391101	0.396638	0.483363	0.363724	0.407374	0.526671	0.443617	0.391928	0.576635	0.419522	0.392859	0.438699	0.434696	0.550605	0.471452	0.406909
LY-2183240	0.416291	0.431416	0.431573	0.429498	0.436289	0.426483	0.419242	0.428691	0.432421	0.431525	0.427716	0.43904	0.423412	0.438732	0.431654	0.432072	0.435223	0.424863	0.425069	0.432069	0.434044	0.429886	0.416017	0.449892	0.423761	0.421165	0.437185	0.409298	0.441438	0.429186	0.433189	0.4283	0.438933	0.406773	0.428688	0.430625	0.434027	0.420702	0.444684	0.439894	0.41997	0.44234	0.430703	0.417797	0.426731	0.43548	0.41892	0.414105	0.431375
Ki8751	0.470539	0.46275	0.487908	0.476063	0.468791	0.452141	0.469759	0.467403	0.465605	0.464833	0.476479	0.471271	0.485454	0.477082	0.482356	0.479555	0.477787	0.458269	0.47523	0.464369	0.46148	0.472036	0.482732	0.490654	0.474553	0.453063	0.482845	0.44952	0.478232	0.48271	0.468697	0.466034	0.493095	0.430423	0.485981	0.477578	0.465227	0.466316	0.495478	0.48994	0.460794	0.488914	0.457477	0.445551	0.467926	0.473008	0.46851	0.444266	0.466775
CD-1530	0.446854	0.450402	0.457302	0.454133	0.451947	0.445677	0.438243	0.453844	0.451646	0.444792	0.461185	0.455627	0.455163	0.45708	0.458277	0.449306	0.455463	0.442538	0.451005	0.449724	0.453779	0.45179	0.45792	0.457735	0.453257	0.441416	0.453584	0.42924	0.454523	0.453933	0.443986	0.450657	0.455043	0.433765	0.453226	0.448188	0.452817	0.444509	0.458436	0.455438	0.455699	0.447022	0.452327	0.445254	0.448908	0.448129	0.454553	0.437592	0.452345
TPCA-1	0.43327	0.429296	0.446462	0.441043	0.435619	0.437038	0.426956	0.425256	0.436427	0.434854	0.434902	0.430758	0.446337	0.439559	0.434196	0.452063	0.438372	0.426212	0.428042	0.430246	0.436201	0.435276	0.424582	0.441545	0.433488	0.43378	0.437878	0.418195	0.43706	0.437499	0.44246	0.434772	0.44461	0.418384	0.443922	0.445502	0.431696	0.434227	0.455446	0.449461	0.429125	0.44345	0.424151	0.423923	0.437191	0.435079	0.441444	0.427614	0.428802
NSC632839	0.409398	0.428229	0.423844	0.417475	0.423469	0.424579	0.408357	0.418953	0.426881	0.417158	0.431163	0.424845	0.415075	0.423446	0.422334	0.422539	0.4238	0.408415	0.408934	0.423215	0.422314	0.419566	0.409495	0.432073	0.417991	0.412597	0.42747	0.384572	0.426597	0.43293	0.415322	0.418457	0.424476	0.400345	0.414485	0.420731	0.420437	0.420972	0.429552	0.422947	0.417227	0.419149	0.420493	0.416167	0.416987	0.42287	0.423079	0.402526	0.416982
pifithrin-mu	0.484967	0.485889	0.495297	0.487761	0.496713	0.494685	0.495951	0.486105	0.490123	0.492396	0.484823	0.486168	0.484435	0.491058	0.483283	0.489867	0.489755	0.491241	0.485723	0.49351	0.490365	0.490827	0.479909	0.500382	0.485101	0.490221	0.493806	0.483656	0.494453	0.490442	0.483202	0.494568	0.487834	0.490951	0.490472	0.490743	0.491204	0.490407	0.488922	0.49012	0.481197	0.497497	0.493109	0.486703	0.492029	0.491479	0.475015	0.49131	0.48864
BRD-K80183349	0.46943	0.474089	0.473715	0.476834	0.474949	0.469682	0.474789	0.470087	0.477247	0.47272	0.474078	0.481076	0.473095	0.480903	0.470421	0.483997	0.466798	0.473774	0.4805	0.480633	0.477934	0.475623	0.461432	0.482353	0.466248	0.473386	0.480154	0.46493	0.477424	0.470416	0.476028	0.471553	0.474758	0.473533	0.473728	0.476059	0.475075	0.473064	0.482513	0.481499	0.466753	0.487117	0.467645	0.473072	0.470162	0.473031	0.458267	0.466243	0.475192
BRD-K66532283	0.457572	0.460384	0.458959	0.463053	0.465479	0.452659	0.462085	0.459773	0.457593	0.448426	0.467861	0.470399	0.458127	0.46791	0.459493	0.474381	0.465931	0.458359	0.459457	0.458701	0.457577	0.461968	0.464136	0.467247	0.465442	0.458207	0.45686	0.435028	0.459908	0.455592	0.460543	0.45406	0.464937	0.451123	0.457881	0.451101	0.462271	0.453504	0.457649	0.464182	0.466261	0.457268	0.455153	0.455284	0.454745	0.458629	0.472067	0.445688	0.466133
MK-2206	0.430004	0.42867	0.44383	0.434295	0.439434	0.439453	0.432644	0.432146	0.43832	0.435204	0.425301	0.432464	0.440622	0.440788	0.434198	0.433955	0.426138	0.425115	0.435023	0.444821	0.431494	0.430065	0.426576	0.445173	0.428205	0.429948	0.435248	0.413966	0.446617	0.435236	0.431493	0.442765	0.440879	0.427833	0.438555	0.443921	0.433029	0.443066	0.444762	0.437338	0.426193	0.454402	0.439773	0.430838	0.445512	0.431726	0.419209	0.426891	0.434013
triazolothiadiazine	0.315709	0.354809	0.351902	0.329776	0.355625	0.347748	0.319193	0.331385	0.368086	0.356747	0.356948	0.364367	0.332823	0.376126	0.344795	0.35872	0.368458	0.339868	0.340297	0.336703	0.370021	0.344823	0.299562	0.373055	0.304528	0.344495	0.355113	0.271921	0.370891	0.344993	0.31767	0.34038	0.32789	0.303977	0.326685	0.341263	0.358528	0.336688	0.364756	0.364733	0.291214	0.394595	0.353545	0.314051	0.325513	0.362059	0.309942	0.30617	0.340397
BRD-K66453893	0.423039	0.436722	0.439958	0.424343	0.43555	0.433065	0.420376	0.431504	0.435566	0.432272	0.428545	0.447293	0.423885	0.440987	0.4341	0.44242	0.440676	0.433304	0.42389	0.436112	0.428898	0.431024	0.42219	0.433762	0.41624	0.431864	0.429078	0.412066	0.437249	0.432147	0.432527	0.43005	0.435492	0.419666	0.424045	0.429786	0.442849	0.434415	0.44264	0.439093	0.428714	0.427933	0.429907	0.426267	0.432199	0.428666	0.414501	0.415161	0.433333
BRD-K11533227	0.470163	0.474514	0.474971	0.47586	0.47669	0.473087	0.476526	0.478657	0.477439	0.477526	0.474767	0.479325	0.47681	0.480418	0.473203	0.4817	0.477048	0.46985	0.471828	0.47313	0.474651	0.477207	0.468635	0.481691	0.470298	0.471125	0.476953	0.466392	0.478674	0.471953	0.471692	0.475235	0.476818	0.470259	0.472806	0.474668	0.473396	0.475927	0.480782	0.478683	0.468816	0.483712	0.475232	0.473791	0.475917	0.475778	0.46909	0.468256	0.47101
piperlongumine	0.424775	0.433087	0.444584	0.432833	0.441094	0.43564	0.4407	0.422094	0.440151	0.43404	0.433531	0.430021	0.425948	0.442435	0.427526	0.441395	0.441265	0.434916	0.424498	0.44132	0.435474	0.432709	0.421874	0.450186	0.428338	0.433553	0.436567	0.414094	0.445268	0.438508	0.430304	0.43956	0.426896	0.421145	0.431315	0.436231	0.436208	0.429341	0.435578	0.441148	0.425921	0.438921	0.432073	0.421076	0.428283	0.434436	0.432122	0.423557	0.437037
BRD-K14844214	0.486462	0.487417	0.484957	0.487838	0.486666	0.486646	0.489563	0.487865	0.487102	0.486696	0.485891	0.485946	0.488055	0.488669	0.487084	0.48395	0.48836	0.487983	0.487827	0.486045	0.485131	0.486698	0.485544	0.486603	0.483726	0.485929	0.485231	0.491372	0.488601	0.487198	0.489896	0.485583	0.487966	0.486691	0.487579	0.488097	0.486223	0.48639	0.489155	0.485235	0.483359	0.491072	0.484539	0.485837	0.486148	0.483448	0.48887	0.485515	0.486811
BRD1835	0.479482	0.482516	0.485792	0.484482	0.486465	0.486687	0.48212	0.484043	0.48547	0.487481	0.482475	0.482331	0.478699	0.485432	0.48235	0.478606	0.483242	0.484556	0.480944	0.484242	0.48428	0.482041	0.478817	0.487856	0.481124	0.481429	0.486023	0.478995	0.483343	0.484908	0.483119	0.486263	0.483322	0.483461	0.484789	0.482948	0.482052	0.484941	0.482926	0.482474	0.476725	0.482276	0.486344	0.482253	0.484351	0.483336	0.47497	0.484773	0.482319
BRD-K41597374	0.47613	0.478814	0.479917	0.47939	0.482678	0.48551	0.481913	0.478959	0.482302	0.48291	0.479782	0.477691	0.472085	0.480553	0.477017	0.474917	0.474876	0.479496	0.479061	0.479158	0.480645	0.478318	0.467867	0.482581	0.473215	0.480992	0.482284	0.475273	0.47758	0.481258	0.476664	0.482788	0.478403	0.480919	0.480123	0.479742	0.47832	0.481015	0.479199	0.477662	0.466745	0.482504	0.479537	0.478777	0.48135	0.474985	0.459851	0.480933	0.479073
BRD-K63431240	0.361114	0.368378	0.35106	0.359965	0.365152	0.366399	0.357563	0.352239	0.362775	0.365109	0.356039	0.363135	0.357528	0.367337	0.359324	0.35661	0.360185	0.364745	0.349579	0.360978	0.359379	0.361491	0.357084	0.353576	0.353169	0.363303	0.36173	0.357975	0.365153	0.356011	0.369134	0.353838	0.358146	0.366584	0.358854	0.363085	0.359438	0.355323	0.361123	0.35242	0.356477	0.361291	0.356237	0.357915	0.360718	0.365292	0.361115	0.35319	0.362518
BRD-K13999467	0.482257	0.485989	0.487388	0.484979	0.488626	0.489174	0.485766	0.484496	0.489712	0.489372	0.487762	0.484885	0.483335	0.487087	0.486491	0.484933	0.484783	0.484198	0.486467	0.486288	0.488151	0.486296	0.479052	0.487507	0.482444	0.487526	0.486384	0.483852	0.486524	0.48782	0.480966	0.487682	0.485945	0.485805	0.486798	0.485086	0.486822	0.487826	0.485218	0.485354	0.479024	0.488752	0.487945	0.485616	0.486843	0.483705	0.476054	0.485719	0.486096
brefeldin A	0.282189	0.282412	0.30477	0.257868	0.285508	0.299671	0.284761	0.270447	0.284369	0.304573	0.270652	0.288983	0.298102	0.288208	0.280834	0.318803	0.278286	0.259465	0.286409	0.287912	0.282622	0.279782	0.247534	0.288083	0.259192	0.267627	0.279591	0.245788	0.28755	0.287903	0.264268	0.272273	0.288805	0.270064	0.296064	0.29958	0.28032	0.285718	0.289071	0.285005	0.279728	0.282292	0.277917	0.279037	0.29459	0.295748	0.2489	0.272332	0.264108
AGK-2	0.49068	0.491503	0.49167	0.491552	0.491823	0.492335	0.49202	0.489668	0.490793	0.490096	0.491823	0.491493	0.487407	0.490089	0.491229	0.490183	0.490408	0.494227	0.487931	0.491421	0.491512	0.488574	0.49144	0.490706	0.491172	0.490475	0.491422	0.49094	0.491627	0.490293	0.492135	0.492754	0.489528	0.492088	0.491878	0.492169	0.48962	0.491022	0.492442	0.490417	0.488185	0.488966	0.490508	0.489909	0.490064	0.489689	0.492326	0.492564	0.492566
L-685458	0.489509	0.4923	0.492715	0.491341	0.493229	0.494394	0.492352	0.492003	0.492457	0.493538	0.492555	0.489807	0.492568	0.494394	0.491372	0.491873	0.491155	0.490309	0.492093	0.491595	0.493645	0.492573	0.484311	0.4927	0.492703	0.493416	0.492294	0.48712	0.490836	0.492128	0.490763	0.491377	0.491186	0.493389	0.491138	0.492816	0.493329	0.493293	0.489906	0.494374	0.488179	0.496369	0.493092	0.492191	0.493229	0.491012	0.486364	0.489759	0.492228
PF-750	0.434746	0.430966	0.445653	0.441942	0.446467	0.445516	0.439199	0.441278	0.443771	0.441877	0.442109	0.434775	0.43479	0.441242	0.437951	0.434845	0.437508	0.433628	0.438703	0.438651	0.445076	0.439931	0.431977	0.449998	0.434574	0.435727	0.445202	0.424974	0.440689	0.443275	0.431733	0.44551	0.440936	0.432951	0.444056	0.44056	0.43634	0.443986	0.438246	0.440473	0.427432	0.44534	0.447283	0.435582	0.444814	0.44308	0.424384	0.440116	0.431562
triptolide	0.401017	0.420375	0.398969	0.397707	0.408216	0.408902	0.393335	0.39321	0.412334	0.406572	0.409679	0.40854	0.410929	0.41054	0.402062	0.401299	0.408808	0.399775	0.397176	0.41758	0.410002	0.408827	0.398159	0.417114	0.393105	0.404014	0.406478	0.385565	0.418066	0.406631	0.394215	0.400938	0.398479	0.39587	0.395851	0.395552	0.416016	0.388456	0.409297	0.399868	0.409037	0.403796	0.406304	0.400412	0.404786	0.406117	0.406405	0.382636	0.412589
nutlin-3	0.438868	0.431922	0.461932	0.448081	0.43318	0.433293	0.460763	0.439742	0.436032	0.434325	0.424348	0.449847	0.464064	0.44669	0.427164	0.476497	0.449725	0.43169	0.445684	0.4378	0.434733	0.451612	0.441648	0.456699	0.449705	0.423022	0.441689	0.422096	0.455187	0.434997	0.457988	0.451263	0.462792	0.413768	0.463713	0.458273	0.419709	0.446204	0.470638	0.456357	0.44302	0.462691	0.426537	0.432689	0.443346	0.45636	0.451138	0.445047	0.433859
AA-COCF3	0.41124	0.414323	0.420268	0.413233	0.41458	0.415834	0.414951	0.41593	0.416971	0.415245	0.413569	0.41266	0.416672	0.418398	0.414565	0.411869	0.414831	0.412946	0.414208	0.415039	0.417066	0.415636	0.410615	0.419657	0.413252	0.414257	0.415495	0.411341	0.411841	0.416203	0.411304	0.416563	0.416149	0.412594	0.41546	0.416542	0.414259	0.41636	0.414242	0.41503	0.406834	0.414505	0.416127	0.414099	0.415847	0.414543	0.395452	0.415037	0.412309
16-beta-bromoandrosterone	0.486789	0.488082	0.489704	0.483977	0.490044	0.488414	0.486953	0.489474	0.489499	0.488155	0.489812	0.486251	0.490515	0.488799	0.486901	0.487813	0.48724	0.482455	0.490084	0.487209	0.488186	0.490575	0.485265	0.49198	0.485057	0.485835	0.486611	0.482041	0.490752	0.489809	0.476343	0.486085	0.491302	0.483808	0.488649	0.489161	0.48728	0.487401	0.484203	0.484916	0.482861	0.486511	0.489359	0.488176	0.489819	0.486139	0.479244	0.482955	0.486838
PRL-3 inhibitor I	0.493834	0.496279	0.492736	0.497055	0.493222	0.490049	0.490793	0.498901	0.496047	0.490608	0.49977	0.495998	0.501071	0.495845	0.498026	0.489471	0.498707	0.493138	0.496584	0.492128	0.492852	0.496939	0.500276	0.495635	0.496317	0.489296	0.493551	0.491543	0.49547	0.496307	0.492198	0.492312	0.498006	0.484812	0.496704	0.494983	0.493336	0.489682	0.493957	0.496493	0.494504	0.492684	0.494649	0.492717	0.492165	0.491285	0.499631	0.488207	0.495909
SID 26681509	0.43402	0.433699	0.44484	0.445523	0.442807	0.433503	0.440326	0.439245	0.44174	0.426297	0.449785	0.451654	0.438835	0.442257	0.444174	0.443442	0.448269	0.445225	0.428887	0.443176	0.435246	0.436952	0.449327	0.448042	0.438231	0.42883	0.444237	0.431527	0.435204	0.439643	0.441358	0.441622	0.446573	0.416621	0.449081	0.431799	0.439305	0.431905	0.44637	0.441667	0.444787	0.433696	0.43325	0.42703	0.432419	0.430457	0.459393	0.422341	0.437268
neuronal differentiation inducer III	0.41958	0.427287	0.439918	0.436773	0.43293	0.438337	0.44116	0.428476	0.439707	0.436144	0.426637	0.432097	0.41964	0.435933	0.430978	0.441416	0.421701	0.42631	0.429058	0.433302	0.438967	0.427227	0.409672	0.450496	0.425639	0.432247	0.441733	0.399952	0.442274	0.432812	0.43411	0.442095	0.434279	0.431846	0.437296	0.439462	0.425165	0.437891	0.43331	0.438086	0.411559	0.44596	0.434772	0.42971	0.428758	0.434195	0.405574	0.427163	0.425803
NSC 74859	0.493267	0.495065	0.493591	0.495512	0.495426	0.494812	0.49588	0.494531	0.495116	0.495167	0.494905	0.494907	0.493643	0.495019	0.494068	0.493047	0.495591	0.495301	0.494504	0.494708	0.494777	0.494482	0.493291	0.495376	0.495085	0.494508	0.495043	0.493416	0.494254	0.494472	0.494428	0.494836	0.494726	0.494323	0.494521	0.493122	0.494964	0.494715	0.493842	0.494846	0.493189	0.495049	0.494662	0.493969	0.493954	0.494132	0.492703	0.493588	0.494496
bortezomib	0.392585	0.415173	0.398733	0.39171	0.395993	0.40692	0.387559	0.397453	0.402285	0.410744	0.388268	0.403375	0.401097	0.398214	0.400028	0.393867	0.400912	0.399115	0.395337	0.405416	0.39165	0.406934	0.384047	0.394117	0.385845	0.405139	0.393483	0.410022	0.396403	0.399634	0.402876	0.392724	0.400061	0.405607	0.385449	0.395455	0.40456	0.398605	0.410753	0.39546	0.397017	0.396887	0.402644	0.404391	0.400522	0.393442	0.369308	0.394739	0.399437
ABT-737	0.439766	0.435794	0.44774	0.450599	0.45511	0.447772	0.430499	0.407023	0.446436	0.445026	0.462238	0.42914	0.446531	0.436144	0.435274	0.464944	0.415485	0.407642	0.442811	0.423527	0.449375	0.434323	0.424676	0.467512	0.448722	0.450089	0.43861	0.418995	0.455189	0.462547	0.376774	0.446682	0.454123	0.423417	0.463163	0.481562	0.426507	0.463697	0.476885	0.453664	0.411927	0.483864	0.426142	0.435407	0.452851	0.434221	0.453834	0.430404	0.432861
zebularine	0.488208	0.486167	0.484575	0.480738	0.481103	0.479499	0.46694	0.470487	0.490827	0.481584	0.483588	0.479144	0.482054	0.493312	0.491515	0.483076	0.478475	0.469678	0.491724	0.486325	0.493825	0.487038	0.482221	0.482252	0.466233	0.48718	0.477251	0.465633	0.482278	0.490618	0.457662	0.493539	0.481912	0.482421	0.490109	0.487556	0.491623	0.479929	0.482458	0.475214	0.472422	0.48411	0.485996	0.484074	0.482632	0.490797	0.445945	0.474274	0.483347
PI-103	0.390565	0.382075	0.413968	0.410812	0.39854	0.358701	0.387223	0.392268	0.39648	0.359684	0.420277	0.417673	0.414485	0.422373	0.424194	0.433014	0.417257	0.38336	0.407741	0.404417	0.389064	0.420277	0.432557	0.422827	0.415458	0.377863	0.378756	0.339755	0.396483	0.404662	0.379809	0.378277	0.428643	0.332177	0.412769	0.397183	0.412129	0.38246	0.397972	0.435842	0.424674	0.403354	0.379559	0.364069	0.385897	0.388431	0.483388	0.338217	0.392387
SR-II-138A	0.254661	0.28821	0.27584	0.256704	0.280114	0.299845	0.263999	0.256538	0.28931	0.296736	0.28005	0.275691	0.239794	0.286837	0.274733	0.261493	0.270885	0.273992	0.25277	0.285031	0.285981	0.264268	0.227791	0.292129	0.239747	0.266157	0.286902	0.21205	0.289437	0.279993	0.272887	0.273313	0.256978	0.268911	0.247507	0.27004	0.282181	0.272754	0.271008	0.271914	0.243112	0.271502	0.279351	0.263878	0.264673	0.267987	0.205051	0.267752	0.28337
parthenolide	0.452456	0.443388	0.464927	0.447209	0.457104	0.450548	0.463518	0.462775	0.450932	0.445426	0.467625	0.455545	0.465658	0.452128	0.463549	0.468134	0.462886	0.444518	0.453501	0.445153	0.454981	0.458616	0.455961	0.469251	0.449657	0.44162	0.449701	0.444265	0.472699	0.455348	0.454765	0.45987	0.47058	0.436884	0.468799	0.480632	0.444465	0.451835	0.475368	0.462539	0.452848	0.460429	0.456224	0.447435	0.458525	0.462048	0.473631	0.452288	0.453082
Compound 7d-cis	0.437766	0.449245	0.460328	0.452962	0.465812	0.45685	0.460956	0.448133	0.450084	0.453373	0.462078	0.452093	0.435889	0.462359	0.449989	0.460565	0.461296	0.457779	0.448663	0.453223	0.449446	0.455927	0.447481	0.471296	0.450317	0.444641	0.466589	0.427228	0.478933	0.452866	0.452302	0.460917	0.453945	0.434109	0.463168	0.465039	0.450403	0.453064	0.470174	0.459405	0.439329	0.4695	0.452781	0.43735	0.456305	0.454734	0.472373	0.45189	0.455666
TG-101348	0.408394	0.397131	0.411738	0.4042	0.404175	0.397672	0.410131	0.398429	0.396332	0.396448	0.403301	0.406027	0.413576	0.406868	0.399684	0.424539	0.407279	0.399383	0.404175	0.401994	0.391876	0.403597	0.416213	0.403841	0.402095	0.3957	0.404433	0.402275	0.400711	0.404451	0.412333	0.401749	0.410942	0.384757	0.410032	0.409132	0.400946	0.39987	0.414477	0.409127	0.402332	0.409926	0.385834	0.393481	0.403642	0.396053	0.425303	0.39365	0.399522
pevonedistat	0.380622	0.406423	0.415414	0.411027	0.41704	0.413665	0.391927	0.39922	0.419658	0.416901	0.431069	0.425877	0.384404	0.420759	0.401025	0.390955	0.419022	0.413627	0.387961	0.407802	0.424265	0.391602	0.39626	0.425353	0.393604	0.38522	0.433093	0.352098	0.400279	0.396718	0.413343	0.410356	0.390368	0.372598	0.39814	0.378716	0.414193	0.385596	0.399004	0.412516	0.401259	0.407462	0.406037	0.384984	0.376619	0.414155	0.406863	0.376604	0.411895
AZD7545	0.467408	0.470742	0.470096	0.471798	0.472627	0.472999	0.470756	0.472158	0.473861	0.4742	0.471953	0.470185	0.467624	0.473711	0.472408	0.464151	0.471506	0.471216	0.470295	0.47153	0.473647	0.471471	0.463825	0.472707	0.468285	0.470949	0.47311	0.464755	0.468928	0.471087	0.468007	0.471754	0.46957	0.471324	0.470419	0.465734	0.472207	0.472209	0.467932	0.471411	0.465751	0.470709	0.475663	0.470773	0.470637	0.470989	0.458777	0.469819	0.46922
VER-155008	0.460675	0.46452	0.461313	0.46206	0.464802	0.465164	0.460106	0.461963	0.464177	0.463377	0.463202	0.460334	0.457804	0.464059	0.461738	0.455223	0.461631	0.462383	0.46066	0.462252	0.464292	0.46329	0.458439	0.462889	0.460463	0.461161	0.464665	0.456234	0.465684	0.463669	0.460913	0.461866	0.460717	0.462176	0.46271	0.462185	0.462969	0.461573	0.456605	0.459827	0.458892	0.456344	0.465506	0.462469	0.464208	0.463938	0.453557	0.461273	0.465042
ML203	0.497078	0.494976	0.499123	0.497864	0.498318	0.497889	0.502708	0.498626	0.496921	0.497104	0.499626	0.495468	0.49832	0.49932	0.497531	0.500959	0.499124	0.497022	0.499377	0.494804	0.4995	0.498346	0.495424	0.500306	0.497483	0.496278	0.499148	0.491369	0.501225	0.497854	0.495729	0.498245	0.498589	0.495993	0.498198	0.502009	0.495944	0.498742	0.500971	0.499861	0.494716	0.506591	0.500117	0.495578	0.49712	0.499015	0.500152	0.498693	0.49702
SRT-1720	0.476173	0.477262	0.479012	0.477887	0.480352	0.47947	0.479378	0.475747	0.480204	0.483221	0.474766	0.475245	0.479487	0.478717	0.474247	0.482043	0.475519	0.472065	0.478754	0.478371	0.474154	0.477312	0.472575	0.484515	0.471108	0.473601	0.482604	0.477498	0.483434	0.480309	0.465438	0.481264	0.483142	0.470991	0.477332	0.480822	0.474578	0.478874	0.487652	0.478589	0.471646	0.489423	0.478065	0.476324	0.483905	0.478664	0.468957	0.475559	0.474936
CAY10594	0.470065	0.472292	0.469375	0.473057	0.47323	0.470139	0.468396	0.46981	0.471153	0.472483	0.475758	0.474497	0.468407	0.470593	0.47215	0.47413	0.470456	0.468567	0.470373	0.468283	0.471133	0.472806	0.474602	0.472964	0.472688	0.469636	0.472073	0.462971	0.474134	0.470434	0.475402	0.470246	0.473205	0.468279	0.473735	0.470647	0.467717	0.466921	0.474132	0.472069	0.475034	0.472178	0.471296	0.469062	0.472194	0.470786	0.477241	0.466216	0.474327
Compound 1541A	0.497303	0.495947	0.499163	0.499051	0.495803	0.494467	0.495532	0.497457	0.497789	0.497708	0.496934	0.496833	0.501433	0.498176	0.497838	0.498333	0.498288	0.49376	0.499281	0.496742	0.496467	0.497559	0.49902	0.499582	0.496342	0.493396	0.498696	0.500155	0.498642	0.498543	0.495177	0.497483	0.501732	0.491871	0.500865	0.499187	0.495513	0.497541	0.502338	0.498581	0.496145	0.502223	0.496683	0.496059	0.498508	0.498091	0.499042	0.494847	0.495219
RG-108	0.482499	0.480317	0.484742	0.485838	0.482772	0.479806	0.486152	0.483019	0.485971	0.475748	0.483445	0.481837	0.485505	0.49006	0.475846	0.488818	0.491754	0.483813	0.480192	0.480696	0.483335	0.4886	0.492078	0.489415	0.479582	0.481229	0.482273	0.470214	0.479832	0.485769	0.47993	0.486841	0.489644	0.46961	0.479741	0.482122	0.480104	0.48105	0.482134	0.485659	0.475915	0.490491	0.479724	0.474808	0.480345	0.482529	0.487256	0.479401	0.479247
PAC-1	0.425439	0.431136	0.436631	0.43097	0.436582	0.44068	0.438457	0.435005	0.433116	0.436504	0.433727	0.431674	0.426682	0.436906	0.430647	0.431649	0.434461	0.428661	0.432018	0.431776	0.430349	0.438364	0.421321	0.445459	0.425616	0.424478	0.444575	0.412396	0.439645	0.42977	0.419316	0.433207	0.43273	0.421266	0.44038	0.440114	0.430845	0.426563	0.433716	0.432335	0.427895	0.449398	0.435512	0.435259	0.435832	0.432416	0.414221	0.428849	0.428695
pluripotin	0.327603	0.331179	0.315217	0.317634	0.321355	0.31457	0.303508	0.323526	0.317864	0.316744	0.317582	0.326646	0.355473	0.324491	0.316902	0.325454	0.332891	0.31572	0.311064	0.316827	0.308856	0.325531	0.333665	0.311651	0.332298	0.333723	0.310773	0.323785	0.313355	0.322767	0.342677	0.315454	0.331027	0.30939	0.321355	0.329549	0.319624	0.31866	0.327909	0.32231	0.327558	0.291198	0.299437	0.314384	0.317278	0.311513	0.334998	0.305481	0.323803
GMX-1778	0.406265	0.430851	0.436331	0.422846	0.432855	0.424265	0.426523	0.425502	0.427876	0.422112	0.428221	0.426721	0.425009	0.460245	0.422156	0.426989	0.447859	0.430681	0.422313	0.426462	0.43014	0.439207	0.427437	0.457866	0.420225	0.41299	0.428934	0.361786	0.4354	0.43108	0.408407	0.436935	0.434007	0.394494	0.407998	0.411113	0.425775	0.410394	0.40637	0.42815	0.411723	0.432328	0.441811	0.40408	0.41094	0.437978	0.414474	0.40711	0.421956
BMS-536924	0.4333	0.43379	0.437945	0.436811	0.4253	0.43453	0.429835	0.429815	0.432668	0.426813	0.430969	0.426913	0.447077	0.434736	0.422805	0.419305	0.438111	0.432694	0.422922	0.423855	0.431729	0.42626	0.42639	0.420223	0.435828	0.429501	0.431784	0.435855	0.419993	0.428121	0.458007	0.429148	0.433391	0.42257	0.442133	0.429411	0.427058	0.429815	0.426151	0.436257	0.424951	0.416902	0.421097	0.423678	0.42695	0.427303	0.434171	0.431812	0.437844
gemcitabine	0.298225	0.342326	0.359014	0.338393	0.344287	0.317792	0.290497	0.317161	0.356019	0.332307	0.314845	0.344448	0.304238	0.341119	0.311554	0.332821	0.337141	0.313063	0.321137	0.326305	0.344492	0.329764	0.303248	0.400522	0.301208	0.303177	0.378387	0.262864	0.372298	0.315467	0.345364	0.328161	0.373183	0.284254	0.318247	0.337613	0.331386	0.309407	0.397155	0.354335	0.337914	0.398045	0.334463	0.30525	0.334119	0.359489	0.267204	0.291677	0.313172
MST-312	0.400557	0.406513	0.411588	0.412006	0.413244	0.400433	0.401664	0.408711	0.413824	0.409238	0.417045	0.416025	0.409745	0.419509	0.413668	0.41358	0.419247	0.401124	0.41196	0.415294	0.414041	0.414565	0.416781	0.422647	0.41717	0.400644	0.408145	0.38307	0.410174	0.406857	0.407064	0.409887	0.41438	0.390508	0.407095	0.401576	0.416948	0.402211	0.404751	0.417127	0.416436	0.409598	0.411201	0.401621	0.403631	0.411848	0.406039	0.394574	0.411836
olaparib	0.456089	0.457099	0.458932	0.466515	0.460394	0.448365	0.453514	0.453645	0.468889	0.45261	0.465132	0.468271	0.471883	0.468013	0.460647	0.458304	0.467273	0.450773	0.45954	0.461634	0.458997	0.464302	0.480525	0.475851	0.457629	0.450506	0.460417	0.44621	0.469211	0.458861	0.460846	0.460671	0.471443	0.436022	0.460631	0.45896	0.460242	0.450647	0.482417	0.462297	0.456902	0.473304	0.450895	0.450909	0.458867	0.456117	0.487466	0.438175	0.461728
oligomycin A	0.243285	0.23387	0.29926	0.283849	0.285351	0.264773	0.254245	0.288758	0.27543	0.270014	0.302883	0.263544	0.269848	0.299469	0.288347	0.251871	0.276857	0.233563	0.269363	0.265328	0.290226	0.277018	0.250852	0.329982	0.271922	0.243319	0.317907	0.182364	0.264644	0.282914	0.233272	0.28971	0.289331	0.2251	0.291429	0.264496	0.278617	0.279764	0.27928	0.301933	0.253257	0.302975	0.301771	0.245967	0.268408	0.288584	0.226059	0.241792	0.237291
indisulam	0.446476	0.465246	0.461232	0.454319	0.461732	0.463656	0.451039	0.455394	0.456717	0.459436	0.454302	0.463301	0.445484	0.45966	0.44437	0.459329	0.458664	0.46666	0.444063	0.456093	0.452119	0.457796	0.442887	0.474678	0.460612	0.455817	0.46022	0.4269	0.471466	0.465382	0.46167	0.459463	0.457158	0.446173	0.450271	0.452256	0.46315	0.451216	0.463085	0.463797	0.441169	0.462422	0.453319	0.437409	0.451524	0.458462	0.439894	0.44315	0.462
BRD-K02492147	0.496783	0.497509	0.496912	0.497025	0.500825	0.499734	0.497091	0.497522	0.497187	0.497424	0.498083	0.497333	0.496542	0.498354	0.497422	0.4958	0.499401	0.49794	0.496423	0.497385	0.497886	0.497484	0.499078	0.498034	0.498205	0.497994	0.496523	0.496584	0.497804	0.497632	0.496338	0.497075	0.498549	0.498098	0.497151	0.496031	0.4982	0.497986	0.496896	0.496833	0.497212	0.494938	0.498548	0.49765	0.499276	0.496585	0.502147	0.495746	0.497829
austocystin D	0.302395	0.357039	0.418141	0.334093	0.360152	0.397955	0.338568	0.312376	0.386089	0.410394	0.30431	0.31237	0.341507	0.365249	0.336379	0.402307	0.301722	0.3077	0.381396	0.336706	0.387334	0.331667	0.223992	0.400159	0.308402	0.393473	0.383848	0.304761	0.381566	0.364972	0.298636	0.391441	0.385466	0.375779	0.371315	0.437443	0.343048	0.398537	0.405799	0.361945	0.290301	0.50894	0.347795	0.359455	0.39082	0.367943	0.221014	0.349354	0.317797
SJ-172550	0.502205	0.501319	0.501193	0.502262	0.501488	0.50137	0.501964	0.501424	0.501269	0.50167	0.501972	0.501966	0.501992	0.501281	0.501627	0.502146	0.502103	0.501719	0.501423	0.501819	0.501755	0.501807	0.503282	0.501689	0.503282	0.501892	0.501684	0.501765	0.502446	0.50139	0.502694	0.501869	0.501614	0.502026	0.502026	0.501907	0.501423	0.50154	0.501485	0.501856	0.503258	0.501916	0.50148	0.501459	0.50157	0.502606	0.50523	0.502092	0.50223
BRD-K09587429	0.498975	0.499221	0.498848	0.498366	0.499152	0.499911	0.498723	0.498621	0.498979	0.499446	0.49814	0.498388	0.498745	0.498489	0.498334	0.499349	0.497945	0.498545	0.499227	0.499212	0.498714	0.499026	0.497762	0.498298	0.498456	0.499942	0.498581	0.49997	0.498816	0.498983	0.49811	0.498469	0.498334	0.500411	0.498431	0.499275	0.499166	0.49922	0.498479	0.498072	0.498614	0.49886	0.498549	0.499825	0.499592	0.498477	0.497357	0.499379	0.498932
pandacostat	0.484199	0.482927	0.486373	0.485935	0.48603	0.485777	0.487168	0.485699	0.484682	0.484589	0.48605	0.483443	0.482147	0.48696	0.484152	0.486165	0.485445	0.484652	0.483163	0.483595	0.485525	0.485406	0.484019	0.488142	0.48656	0.484016	0.487543	0.479245	0.486676	0.486066	0.486266	0.486693	0.485984	0.483459	0.48596	0.487009	0.483752	0.485979	0.483319	0.48584	0.483237	0.487071	0.486588	0.483161	0.484735	0.486423	0.486343	0.484231	0.483582
tipifarnib-P1	0.452851	0.442363	0.473401	0.458496	0.463394	0.452717	0.450017	0.453318	0.455419	0.454203	0.468782	0.453447	0.461493	0.472492	0.461203	0.468973	0.466404	0.448265	0.453931	0.44957	0.461997	0.457608	0.461541	0.483608	0.463604	0.445408	0.463764	0.417078	0.478454	0.463794	0.455063	0.461895	0.471716	0.429392	0.473933	0.475876	0.45443	0.455323	0.475177	0.472787	0.443146	0.483332	0.456633	0.438476	0.46189	0.46553	0.462276	0.445317	0.460213
Compound 23 citrate	0.446464	0.451708	0.453049	0.452766	0.456369	0.461971	0.458836	0.451162	0.453728	0.459013	0.448401	0.453078	0.448481	0.455292	0.446955	0.458167	0.44966	0.448558	0.451078	0.453953	0.452015	0.453056	0.437744	0.455126	0.445778	0.449611	0.45595	0.442955	0.450151	0.450346	0.451171	0.457118	0.448581	0.452429	0.449606	0.45503	0.451899	0.45131	0.453153	0.450495	0.44224	0.458032	0.452574	0.452329	0.45288	0.451851	0.431955	0.452656	0.450278
nakiterpiosin	0.365995	0.387579	0.386597	0.373588	0.381426	0.382126	0.357481	0.376172	0.39948	0.386226	0.371248	0.395569	0.391437	0.397234	0.37796	0.40071	0.389788	0.365713	0.379795	0.383215	0.389002	0.385488	0.351154	0.384983	0.350924	0.377795	0.380204	0.363388	0.394948	0.384512	0.370251	0.381369	0.386839	0.355299	0.375998	0.388849	0.388542	0.38757	0.404637	0.381412	0.365377	0.398631	0.380715	0.376974	0.385252	0.387127	0.334874	0.355595	0.370954
CCT036477	0.484209	0.47659	0.483406	0.486334	0.480019	0.470265	0.488674	0.476487	0.477821	0.471299	0.485254	0.482658	0.4856	0.483592	0.483796	0.488547	0.490351	0.484677	0.482442	0.480627	0.477479	0.48026	0.497551	0.485034	0.487085	0.469912	0.477765	0.484539	0.482581	0.479181	0.485884	0.48083	0.489454	0.46391	0.485492	0.487823	0.479331	0.474521	0.489108	0.484083	0.48825	0.487628	0.472677	0.474257	0.476668	0.47713	0.509959	0.475311	0.481778
tamatinib	0.455802	0.450147	0.451778	0.450104	0.450183	0.44389	0.442566	0.445956	0.445848	0.439466	0.458265	0.454181	0.463281	0.449188	0.452031	0.461083	0.456521	0.450051	0.443482	0.447883	0.441772	0.448768	0.46695	0.448937	0.45964	0.449423	0.445422	0.44455	0.451992	0.452466	0.452928	0.441735	0.457254	0.436682	0.456177	0.453505	0.451024	0.442428	0.456041	0.452093	0.455255	0.444837	0.434508	0.440907	0.445839	0.439271	0.478609	0.437126	0.457515
YM-155	0.319491	0.358598	0.340619	0.348259	0.355092	0.329991	0.344043	0.333881	0.357609	0.332666	0.351341	0.352858	0.32286	0.347131	0.355198	0.315058	0.36596	0.330654	0.336162	0.357261	0.336317	0.359809	0.351693	0.337839	0.330127	0.341429	0.342965	0.305163	0.339199	0.328841	0.350357	0.329041	0.332892	0.3178	0.32605	0.310565	0.358035	0.327848	0.314796	0.34089	0.342878	0.342139	0.347969	0.338943	0.350384	0.332458	0.347133	0.304591	0.359312
BMS-754807	0.394834	0.39018	0.418739	0.392464	0.390887	0.398847	0.420281	0.381548	0.389721	0.392765	0.387252	0.389997	0.408315	0.403284	0.368543	0.40816	0.402014	0.39479	0.39356	0.374919	0.387591	0.398723	0.362915	0.41459	0.397481	0.38447	0.408193	0.389081	0.393307	0.401328	0.409269	0.402854	0.407582	0.360895	0.412879	0.410477	0.389772	0.406634	0.390523	0.416193	0.360502	0.428305	0.383981	0.365361	0.398944	0.402855	0.378594	0.392374	0.384115
BIBR-1532	0.464624	0.461983	0.468079	0.467495	0.465894	0.463281	0.459365	0.464263	0.465548	0.464205	0.46933	0.466928	0.467533	0.46825	0.467826	0.467786	0.465629	0.453984	0.46679	0.463562	0.467911	0.463862	0.46636	0.471687	0.465071	0.460968	0.469474	0.453911	0.465268	0.468336	0.456795	0.466994	0.472254	0.454849	0.469727	0.468181	0.463544	0.466302	0.470552	0.467203	0.464189	0.471864	0.464419	0.463227	0.465656	0.467107	0.460441	0.458674	0.458612
tosedostat	0.391754	0.398002	0.398561	0.396389	0.402402	0.403921	0.400962	0.397336	0.397892	0.397212	0.395195	0.396864	0.390475	0.399049	0.394161	0.392128	0.399262	0.399628	0.389127	0.398739	0.396731	0.394313	0.389283	0.400365	0.397309	0.395851	0.402415	0.391868	0.393274	0.397459	0.396455	0.39952	0.399262	0.396094	0.396169	0.396077	0.398401	0.396718	0.394836	0.396286	0.386574	0.391734	0.398556	0.395144	0.397155	0.397574	0.385268	0.393882	0.397449
neratinib	0.365883	0.38814	0.393848	0.35743	0.383882	0.39575	0.358791	0.369808	0.370134	0.381734	0.359139	0.372141	0.355355	0.383941	0.358985	0.430891	0.347041	0.371373	0.362256	0.377859	0.366676	0.38654	0.328556	0.389714	0.37964	0.402465	0.389615	0.315813	0.405927	0.387633	0.362535	0.38291	0.371654	0.378655	0.382443	0.406293	0.381204	0.388193	0.38033	0.387439	0.361729	0.373379	0.347699	0.380655	0.390209	0.367247	0.37056	0.370652	0.373007
BRD1812	0.429142	0.43105	0.445448	0.428568	0.440948	0.432912	0.433013	0.428296	0.436995	0.423544	0.443945	0.437249	0.45446	0.444344	0.427984	0.442423	0.438257	0.425893	0.437096	0.447689	0.443181	0.441794	0.42991	0.45193	0.425158	0.428527	0.438747	0.428974	0.441621	0.433957	0.434331	0.435964	0.445125	0.409547	0.440007	0.437711	0.443618	0.427487	0.458639	0.435932	0.432351	0.446985	0.42229	0.426779	0.442309	0.443505	0.446787	0.42177	0.431932
BRD8958	0.512801	0.512737	0.513549	0.512946	0.513094	0.513485	0.513137	0.513155	0.512747	0.513784	0.511893	0.512933	0.51258	0.513021	0.512291	0.512895	0.512934	0.512986	0.512642	0.5131	0.512132	0.512804	0.513221	0.513856	0.512654	0.51266	0.51355	0.513176	0.512774	0.512876	0.512987	0.51355	0.513247	0.512817	0.512959	0.51362	0.512364	0.513021	0.513436	0.512728	0.512053	0.51322	0.512581	0.51273	0.513403	0.513477	0.512287	0.51307	0.512472
serdemetan	0.454203	0.449828	0.461025	0.45682	0.456471	0.449906	0.464494	0.448585	0.454507	0.447588	0.453114	0.453888	0.46023	0.460546	0.448338	0.473555	0.453837	0.451095	0.451874	0.453419	0.454212	0.453434	0.464366	0.47654	0.451403	0.446157	0.468128	0.429379	0.478725	0.457285	0.452594	0.464552	0.458923	0.432541	0.459538	0.463226	0.448866	0.447339	0.476726	0.463713	0.443736	0.487709	0.445538	0.438806	0.450811	0.462598	0.483783	0.445401	0.453146
daporinad	0.317374	0.35373	0.364427	0.347811	0.347355	0.356114	0.342767	0.35563	0.360526	0.358837	0.348198	0.361862	0.323262	0.397178	0.338559	0.325201	0.401708	0.356553	0.339711	0.358313	0.356984	0.365023	0.346785	0.390686	0.327992	0.332175	0.361591	0.233472	0.360507	0.36065	0.333839	0.37321	0.356233	0.297037	0.321049	0.297774	0.363737	0.332541	0.317199	0.362045	0.330196	0.352844	0.380835	0.318307	0.325499	0.379745	0.29453	0.329719	0.338974
MK-1775	0.359053	0.385287	0.368234	0.375105	0.383782	0.385978	0.365529	0.366413	0.386365	0.37617	0.377434	0.382274	0.369127	0.388377	0.368917	0.380829	0.380747	0.372432	0.36039	0.376041	0.378979	0.377427	0.360562	0.382532	0.369513	0.379354	0.389009	0.337623	0.38248	0.376082	0.379274	0.372966	0.369573	0.359758	0.360331	0.371628	0.376494	0.369293	0.378024	0.379086	0.353233	0.384154	0.37238	0.361197	0.36578	0.371584	0.368975	0.354385	0.378611
tivozanib	0.446066	0.445704	0.450665	0.444113	0.443753	0.439982	0.453501	0.443465	0.444242	0.439136	0.452775	0.445841	0.454076	0.449708	0.454729	0.445451	0.451582	0.446182	0.44033	0.44328	0.442235	0.442106	0.449374	0.448723	0.441228	0.437568	0.442065	0.44486	0.443454	0.44962	0.448785	0.444446	0.451763	0.432914	0.449692	0.451904	0.442114	0.447281	0.450916	0.444046	0.439026	0.443988	0.441907	0.437704	0.440642	0.442824	0.447513	0.437104	0.445931
Ko-143	0.455436	0.458025	0.461633	0.45871	0.463941	0.46411	0.462229	0.460465	0.461565	0.46248	0.458784	0.458626	0.453301	0.463636	0.45964	0.452021	0.4599	0.463586	0.457244	0.459895	0.462401	0.460668	0.44936	0.466907	0.450738	0.457271	0.463695	0.454772	0.462114	0.461709	0.463584	0.462652	0.459633	0.459061	0.46138	0.463229	0.458609	0.4627	0.463803	0.461875	0.445635	0.463275	0.463832	0.457453	0.461786	0.461762	0.446348	0.462326	0.458128
CR-1-31B	0.197093	0.23927	0.231172	0.19994	0.238213	0.246122	0.215985	0.199195	0.23918	0.242342	0.234796	0.233666	0.190857	0.242612	0.225683	0.210158	0.226539	0.21894	0.196976	0.232816	0.243864	0.211418	0.178821	0.254587	0.189124	0.208782	0.242085	0.151094	0.253615	0.223904	0.229997	0.221689	0.202487	0.21677	0.196089	0.222918	0.241023	0.211961	0.215827	0.216209	0.193563	0.222405	0.232892	0.201333	0.207181	0.22232	0.165404	0.204804	0.242589
BRD-K26531177	0.388023	0.387269	0.397404	0.393879	0.392784	0.386788	0.396615	0.389518	0.390936	0.387462	0.398718	0.387861	0.396431	0.398405	0.389639	0.398956	0.398779	0.385585	0.395004	0.390038	0.38861	0.392583	0.393086	0.402367	0.394522	0.385468	0.399726	0.379323	0.403236	0.393953	0.384358	0.392769	0.39466	0.377004	0.393559	0.395451	0.38916	0.385701	0.394802	0.3929	0.388687	0.408933	0.390933	0.380965	0.389544	0.392262	0.400741	0.382748	0.392432
BRD-K71781559	0.479444	0.48027	0.483974	0.481039	0.48232	0.479484	0.476636	0.48299	0.48197	0.480763	0.479458	0.482701	0.482304	0.483047	0.480179	0.480238	0.482597	0.479718	0.478971	0.480785	0.481471	0.48221	0.482126	0.483842	0.478957	0.479292	0.482324	0.477711	0.479427	0.482212	0.475886	0.482065	0.483603	0.479985	0.479699	0.48018	0.480794	0.481901	0.48302	0.481905	0.478379	0.48048	0.483927	0.48195	0.482253	0.481618	0.471621	0.47913	0.478244
BRD-K04800985	0.497858	0.494379	0.494272	0.495033	0.49447	0.497172	0.499527	0.496003	0.492806	0.495507	0.490638	0.494347	0.493805	0.495829	0.49312	0.494695	0.49608	0.497579	0.493816	0.494652	0.491496	0.493421	0.494149	0.496417	0.494283	0.495461	0.493872	0.498697	0.495745	0.494471	0.498786	0.493415	0.496188	0.496847	0.495357	0.497485	0.493958	0.495506	0.493297	0.494391	0.493599	0.497653	0.492957	0.494591	0.495309	0.493285	0.499936	0.494526	0.49417
BRD-K19103580	0.483209	0.485316	0.484663	0.48295	0.48914	0.489392	0.48632	0.484064	0.483808	0.486558	0.487505	0.48402	0.484679	0.484648	0.483363	0.486308	0.481602	0.483939	0.485838	0.485435	0.484946	0.486135	0.482418	0.486109	0.483482	0.488474	0.483168	0.483434	0.484936	0.486298	0.482275	0.485879	0.485801	0.486061	0.484135	0.487602	0.486433	0.485335	0.489765	0.485202	0.479659	0.486917	0.482875	0.484976	0.48797	0.481536	0.476263	0.486658	0.486799
BRD-K64610608	0.509219	0.504638	0.509474	0.508029	0.511041	0.51008	0.511407	0.510735	0.509371	0.507845	0.510251	0.509416	0.503609	0.510926	0.509902	0.505384	0.509526	0.513631	0.506296	0.509477	0.51151	0.510393	0.513122	0.511768	0.508948	0.50963	0.511991	0.500787	0.515847	0.509971	0.50875	0.514518	0.508454	0.509178	0.508181	0.512248	0.50547	0.508183	0.509179	0.508075	0.503614	0.510728	0.5158	0.507052	0.510067	0.511786	0.513686	0.513487	0.511962
BRD-K02251932	0.481269	0.481698	0.482725	0.482592	0.482707	0.48318	0.483036	0.482495	0.481275	0.481889	0.480522	0.481953	0.480941	0.482603	0.481601	0.483248	0.4817	0.480073	0.481128	0.481673	0.47976	0.481668	0.480309	0.483149	0.481595	0.480893	0.481007	0.48047	0.481104	0.48254	0.481357	0.481908	0.48415	0.479652	0.48335	0.483616	0.482025	0.482354	0.481775	0.481225	0.479206	0.480471	0.480176	0.481795	0.482602	0.480237	0.478696	0.478991	0.480468
BRD-K55116708	0.449596	0.449467	0.455112	0.450107	0.453095	0.456471	0.4515	0.452159	0.4511	0.450313	0.448466	0.451612	0.444294	0.451959	0.447582	0.449419	0.453378	0.454114	0.442317	0.453591	0.44738	0.446836	0.450103	0.450994	0.44709	0.447606	0.455055	0.450699	0.449127	0.449009	0.457674	0.452837	0.449639	0.451623	0.451585	0.450168	0.449767	0.451588	0.451991	0.448838	0.445863	0.442674	0.448921	0.449111	0.451552	0.449185	0.453091	0.449262	0.452163
NSC23766	0.436399	0.443931	0.437889	0.434512	0.443964	0.441697	0.4531	0.436713	0.436065	0.430207	0.445668	0.440807	0.426428	0.445585	0.443119	0.436243	0.448003	0.453849	0.426654	0.44294	0.43474	0.437257	0.448982	0.433816	0.434178	0.428923	0.444958	0.41601	0.449725	0.441074	0.450306	0.442109	0.429879	0.43271	0.433026	0.435092	0.446205	0.436105	0.430194	0.439074	0.428901	0.42881	0.438636	0.42972	0.430932	0.435012	0.457638	0.433873	0.449961
pyrazolanthrone	0.468212	0.463965	0.466517	0.469167	0.46513	0.464777	0.458786	0.4598	0.468121	0.46366	0.470113	0.463684	0.470404	0.470294	0.463976	0.471681	0.470157	0.461526	0.463403	0.464572	0.468277	0.464521	0.469498	0.469034	0.470404	0.463442	0.463379	0.451641	0.469831	0.46914	0.469977	0.463764	0.471249	0.452623	0.470123	0.472881	0.464664	0.465881	0.463648	0.471263	0.470425	0.467752	0.465762	0.457321	0.463632	0.469133	0.475157	0.45816	0.467271
C6-ceramide	0.484195	0.485191	0.484869	0.483557	0.484906	0.485674	0.483323	0.484718	0.484864	0.485679	0.483306	0.483855	0.483844	0.484016	0.484026	0.482869	0.482903	0.484192	0.484739	0.484653	0.484179	0.484334	0.482634	0.484388	0.482865	0.484655	0.484638	0.485406	0.484131	0.48488	0.482751	0.484225	0.484236	0.48555	0.484129	0.484259	0.484318	0.484914	0.484634	0.483565	0.482374	0.483037	0.484776	0.485257	0.485569	0.484172	0.479299	0.484815	0.484061
topotecan	0.274317	0.30649	0.332663	0.30641	0.312463	0.287897	0.284998	0.286941	0.322197	0.304771	0.295562	0.315568	0.299709	0.31163	0.302212	0.311635	0.291772	0.289483	0.302885	0.313259	0.32106	0.303334	0.279978	0.364527	0.288804	0.288897	0.339784	0.242247	0.34734	0.295026	0.30265	0.310627	0.324681	0.263346	0.315246	0.310976	0.313778	0.289264	0.35987	0.329674	0.307621	0.34889	0.290565	0.293998	0.302328	0.319043	0.259727	0.257892	0.303766
BRD-K16147474	0.495995	0.495345	0.495775	0.495332	0.49634	0.496504	0.496159	0.495734	0.4955	0.495905	0.495547	0.495397	0.494858	0.495206	0.494996	0.496007	0.495563	0.495653	0.495452	0.495935	0.495483	0.49577	0.496509	0.495862	0.495909	0.495506	0.495813	0.496408	0.495866	0.495772	0.49631	0.496029	0.495672	0.49629	0.495991	0.496011	0.495123	0.495828	0.495087	0.49476	0.494829	0.494504	0.495607	0.495711	0.496208	0.495827	0.496232	0.49629	0.49581
BRD-K33199242	0.496009	0.49099	0.493621	0.492863	0.491967	0.490704	0.50067	0.493226	0.489219	0.488158	0.488175	0.494829	0.494197	0.489439	0.488946	0.496205	0.490502	0.496246	0.492791	0.493456	0.488545	0.490346	0.498438	0.492289	0.491066	0.490115	0.48823	0.505058	0.492649	0.490845	0.501582	0.494143	0.494591	0.491868	0.492981	0.495804	0.49071	0.494665	0.499504	0.491178	0.490164	0.493807	0.485433	0.491758	0.493317	0.489123	0.498889	0.49487	0.491513
BRD-K52037352	0.489455	0.492701	0.491478	0.491725	0.493232	0.49347	0.492585	0.489278	0.491748	0.493243	0.488253	0.491519	0.490285	0.49182	0.488322	0.491056	0.489415	0.492757	0.491559	0.492888	0.49111	0.49118	0.486547	0.491217	0.488274	0.493733	0.491079	0.496252	0.491281	0.490604	0.488912	0.490212	0.489895	0.495253	0.490086	0.492743	0.491448	0.490864	0.491981	0.488927	0.487106	0.493777	0.489232	0.492578	0.493048	0.486879	0.48476	0.492513	0.492373
N9-isopropylolomoucine	0.427368	0.423508	0.437506	0.438979	0.436881	0.435267	0.440656	0.432312	0.432633	0.432424	0.437546	0.426737	0.421678	0.437357	0.428968	0.433601	0.43433	0.433861	0.425206	0.432809	0.439321	0.430706	0.434115	0.446023	0.438088	0.427455	0.438237	0.415436	0.439853	0.432222	0.445502	0.441228	0.432671	0.424435	0.436487	0.436018	0.433001	0.433813	0.426699	0.438027	0.429129	0.4422	0.434786	0.421708	0.431417	0.440711	0.438812	0.434959	0.435377
BRD-K37390332	0.501847	0.500977	0.500631	0.500045	0.499941	0.49905	0.500259	0.501085	0.499453	0.4995	0.500912	0.501343	0.502527	0.500189	0.500657	0.50036	0.502376	0.500143	0.501552	0.500302	0.499088	0.501271	0.504602	0.500227	0.500733	0.498489	0.500082	0.502157	0.501256	0.500711	0.500765	0.499746	0.501923	0.498398	0.501659	0.50026	0.501134	0.499184	0.501721	0.500214	0.502561	0.499167	0.499824	0.500249	0.500634	0.499939	0.50488	0.499522	0.500694
tandutinib	0.447503	0.445791	0.446002	0.448614	0.441404	0.426897	0.448581	0.443486	0.43969	0.438657	0.444468	0.453908	0.471243	0.451405	0.453695	0.458374	0.455524	0.44196	0.447153	0.443215	0.437293	0.449598	0.472407	0.460704	0.444815	0.427061	0.433065	0.436537	0.455998	0.445019	0.455046	0.435902	0.46286	0.416259	0.448313	0.45693	0.437918	0.434804	0.468003	0.455163	0.452126	0.451516	0.432271	0.436382	0.446388	0.441258	0.479905	0.423551	0.450973
importazole	0.437962	0.438585	0.440597	0.438559	0.439681	0.440109	0.438449	0.439596	0.439031	0.439908	0.437592	0.437962	0.438602	0.439178	0.438057	0.439032	0.437967	0.437313	0.438578	0.439232	0.438112	0.438881	0.437377	0.440841	0.437558	0.437859	0.439725	0.437345	0.438944	0.439705	0.437345	0.43948	0.43959	0.437875	0.439166	0.440122	0.438387	0.439265	0.439532	0.438756	0.43584	0.438347	0.439454	0.439226	0.440515	0.438625	0.433565	0.4386	0.438199
HLI 373	0.462596	0.462595	0.466459	0.462626	0.46589	0.462822	0.467035	0.463275	0.461491	0.46326	0.462202	0.464242	0.464448	0.465213	0.462229	0.467372	0.465667	0.464473	0.462778	0.462408	0.460184	0.464003	0.46306	0.468645	0.459833	0.460187	0.468679	0.4545	0.468872	0.465681	0.465886	0.464279	0.465484	0.457696	0.466668	0.467426	0.463666	0.461467	0.46713	0.466194	0.459697	0.468695	0.461333	0.459835	0.464124	0.46494	0.465694	0.461254	0.463291
etoposide	0.414633	0.429989	0.439184	0.436779	0.423335	0.406345	0.405499	0.411754	0.43926	0.409241	0.429112	0.44139	0.439422	0.434878	0.423759	0.438113	0.43046	0.412208	0.430253	0.433128	0.427542	0.427446	0.423087	0.453775	0.422008	0.403636	0.446821	0.387545	0.457	0.422206	0.409085	0.42018	0.44955	0.380601	0.431976	0.429462	0.423796	0.410288	0.46584	0.440283	0.43069	0.466759	0.409657	0.409616	0.428074	0.442651	0.430485	0.383521	0.429592
PRIMA-1	0.432343	0.427523	0.438285	0.442593	0.439139	0.421458	0.451239	0.417711	0.433573	0.42259	0.439781	0.424766	0.443775	0.443122	0.432789	0.457182	0.443581	0.440351	0.436364	0.437427	0.425308	0.437907	0.432455	0.449786	0.446639	0.428374	0.448092	0.42898	0.456389	0.433359	0.444319	0.434985	0.431545	0.418046	0.449113	0.432877	0.43395	0.420401	0.435612	0.448121	0.440342	0.467491	0.417191	0.415057	0.427295	0.424711	0.473412	0.426619	0.441262
tanespimycin	0.342191	0.348256	0.346478	0.34464	0.347142	0.350818	0.346054	0.347143	0.349297	0.351135	0.341045	0.343857	0.341057	0.347839	0.343808	0.340334	0.342819	0.347934	0.344297	0.345868	0.347515	0.345274	0.334011	0.349001	0.341429	0.346335	0.348464	0.343468	0.345767	0.346772	0.346107	0.347186	0.343989	0.348386	0.344538	0.346036	0.345464	0.348204	0.343245	0.345321	0.337212	0.345286	0.350173	0.347841	0.347113	0.346685	0.326841	0.347913	0.345072
cytochalasin B	0.440651	0.435561	0.4421	0.44834	0.43929	0.433499	0.430503	0.433242	0.429367	0.427248	0.441161	0.44204	0.456074	0.440895	0.434704	0.449354	0.443329	0.429689	0.43658	0.437077	0.4234	0.441039	0.445228	0.434371	0.450598	0.431144	0.438602	0.429736	0.442519	0.437211	0.452036	0.43148	0.451526	0.415458	0.443497	0.44939	0.429431	0.433068	0.453305	0.4469	0.431902	0.436593	0.415416	0.423731	0.439382	0.443576	0.461103	0.418474	0.434602
NSC95397	0.460318	0.461347	0.466673	0.467709	0.467682	0.465177	0.47382	0.468663	0.462591	0.46326	0.470278	0.465022	0.461253	0.468854	0.465817	0.459887	0.474372	0.46979	0.462321	0.464406	0.461178	0.466667	0.46502	0.471302	0.466969	0.456033	0.47233	0.448521	0.470592	0.465479	0.471028	0.466755	0.464745	0.458429	0.468081	0.462669	0.4635	0.463097	0.465364	0.468303	0.457239	0.465709	0.464645	0.456928	0.463882	0.466583	0.477014	0.460651	0.466589
manumycin A	0.450075	0.458967	0.460588	0.466114	0.465751	0.459078	0.465832	0.449854	0.46012	0.452623	0.480327	0.459453	0.451052	0.467088	0.461283	0.448534	0.471582	0.464977	0.447892	0.46158	0.462598	0.456314	0.45536	0.475488	0.465533	0.45158	0.464	0.42953	0.464523	0.456996	0.463621	0.460797	0.459075	0.448724	0.457681	0.450981	0.4611	0.45069	0.462719	0.465674	0.454762	0.46243	0.46102	0.443121	0.449335	0.456525	0.470075	0.445702	0.464342
mitomycin	0.35843	0.384446	0.389132	0.37309	0.364613	0.368842	0.358867	0.353505	0.397489	0.382563	0.363574	0.385566	0.370238	0.380092	0.378553	0.393474	0.364708	0.354243	0.383702	0.381071	0.380769	0.373647	0.341943	0.410366	0.356018	0.356998	0.38541	0.345649	0.397603	0.37393	0.353467	0.390732	0.400584	0.342973	0.378119	0.385065	0.37638	0.381117	0.420032	0.38929	0.359558	0.418443	0.36538	0.364172	0.374346	0.399207	0.326304	0.356845	0.361392
tacrolimus	0.477316	0.473762	0.482923	0.479311	0.479906	0.476155	0.478022	0.476258	0.475748	0.475495	0.479465	0.480051	0.478224	0.478064	0.48045	0.480151	0.478639	0.475831	0.477824	0.478989	0.476829	0.476426	0.478816	0.483038	0.479581	0.47557	0.482497	0.470944	0.478993	0.48002	0.473989	0.480031	0.4811	0.470815	0.482424	0.479887	0.478318	0.478474	0.483408	0.481875	0.476467	0.482297	0.475084	0.473854	0.47799	0.478643	0.474492	0.476791	0.475459
pifithrin-alpha	0.469794	0.470399	0.469501	0.469858	0.469864	0.468207	0.467121	0.469657	0.471159	0.469747	0.471259	0.470576	0.472665	0.470195	0.472382	0.467186	0.469531	0.467397	0.472339	0.470144	0.470338	0.470381	0.47089	0.468896	0.46834	0.469109	0.468331	0.46911	0.468107	0.47022	0.465142	0.468405	0.471323	0.468153	0.470828	0.466117	0.471408	0.469338	0.470002	0.469821	0.470831	0.467584	0.469133	0.470269	0.46999	0.469227	0.465257	0.467253	0.469225
SB-431542	0.484149	0.485053	0.482472	0.481412	0.485726	0.487449	0.4822	0.481949	0.484251	0.485831	0.483309	0.481591	0.481404	0.482554	0.482232	0.483538	0.482849	0.484134	0.483438	0.483735	0.485017	0.48392	0.483899	0.481563	0.482791	0.486302	0.48237	0.484449	0.483878	0.484431	0.480854	0.483454	0.482217	0.486827	0.478759	0.488304	0.48413	0.483444	0.481663	0.480282	0.481932	0.485752	0.485286	0.48666	0.483713	0.47828	0.478544	0.485805	0.484851
SB-225002	0.416835	0.429075	0.43166	0.429983	0.434316	0.425476	0.420091	0.417955	0.437488	0.430638	0.438186	0.449987	0.413609	0.443819	0.448504	0.442461	0.446693	0.418197	0.425627	0.434191	0.43347	0.43036	0.424482	0.44854	0.416496	0.418379	0.430237	0.375572	0.450468	0.435984	0.424135	0.426479	0.437217	0.396259	0.431999	0.428533	0.437322	0.423661	0.427791	0.439679	0.430349	0.438185	0.440183	0.416027	0.420186	0.435081	0.444797	0.394791	0.426197
cerulenin	0.425786	0.426094	0.445611	0.433881	0.443541	0.437219	0.439121	0.430616	0.43351	0.429107	0.429417	0.436161	0.428944	0.437949	0.42584	0.436744	0.445278	0.433865	0.424766	0.438176	0.431675	0.435652	0.427819	0.448558	0.433988	0.435595	0.441833	0.410776	0.442926	0.437594	0.430177	0.436465	0.431023	0.422322	0.436484	0.434096	0.431138	0.431386	0.430976	0.440155	0.414891	0.445342	0.431135	0.421513	0.431396	0.429016	0.434538	0.426634	0.437542
purmorphamine	0.465439	0.467675	0.471513	0.470346	0.472188	0.470339	0.466903	0.470235	0.471024	0.471471	0.468125	0.469037	0.469522	0.469487	0.467731	0.466624	0.466249	0.465415	0.469424	0.469413	0.470391	0.469202	0.46747	0.47428	0.464138	0.466022	0.4693	0.46966	0.467298	0.469389	0.467111	0.471019	0.47188	0.467271	0.470669	0.469476	0.468145	0.470432	0.475455	0.469624	0.461886	0.472079	0.469655	0.469257	0.473468	0.47026	0.455319	0.46903	0.465928
GSK-3 inhibitor IX	0.416479	0.416674	0.416385	0.416769	0.416264	0.415513	0.41654	0.416276	0.416061	0.4157	0.416967	0.417009	0.41713	0.416497	0.416829	0.416547	0.417085	0.416649	0.416347	0.416148	0.416107	0.416395	0.417436	0.416586	0.416848	0.416056	0.41622	0.415762	0.416447	0.416709	0.41742	0.416238	0.417033	0.41503	0.416794	0.416404	0.416516	0.415799	0.416997	0.417093	0.417122	0.416807	0.415674	0.415508	0.4158	0.415914	0.418904	0.415411	0.416626
dasatinib	0.315397	0.339342	0.321708	0.313306	0.325071	0.312738	0.288157	0.310146	0.30932	0.297617	0.3483	0.337944	0.337946	0.319137	0.342493	0.337838	0.319335	0.328324	0.302038	0.321381	0.288174	0.325399	0.349342	0.280023	0.351216	0.342126	0.309081	0.306711	0.311896	0.309469	0.347071	0.292331	0.314976	0.315338	0.328011	0.304424	0.32004	0.293132	0.313878	0.306766	0.359123	0.261893	0.275573	0.305271	0.299261	0.273831	0.451074	0.286367	0.343581
gefitinib	0.40633	0.413498	0.420625	0.399878	0.405307	0.420335	0.376548	0.406368	0.410034	0.419851	0.41091	0.412876	0.406853	0.409385	0.416476	0.436483	0.38508	0.383979	0.404097	0.40679	0.404806	0.420569	0.388195	0.401808	0.401438	0.422286	0.409648	0.37831	0.413155	0.41135	0.40593	0.404994	0.400979	0.416574	0.417795	0.425231	0.401184	0.413867	0.427582	0.413403	0.414667	0.380048	0.399943	0.422422	0.419239	0.405412	0.412158	0.401687	0.401063
erlotinib	0.438622	0.438349	0.447932	0.421396	0.439597	0.45787	0.412231	0.437778	0.43724	0.4442	0.44758	0.440978	0.438783	0.434926	0.439099	0.458011	0.42725	0.425092	0.430239	0.429925	0.435977	0.447229	0.432612	0.426938	0.442764	0.456006	0.444688	0.391327	0.44615	0.440373	0.434797	0.434822	0.42486	0.446784	0.449564	0.460783	0.427292	0.441002	0.436065	0.434617	0.439965	0.404236	0.438013	0.444822	0.442206	0.439317	0.446005	0.439068	0.442256
BRD1378	0.461386	0.458551	0.461673	0.460527	0.461886	0.459526	0.465699	0.459626	0.460617	0.460444	0.462715	0.459378	0.46665	0.459924	0.462594	0.464014	0.463208	0.459631	0.465114	0.462261	0.459876	0.461642	0.46681	0.461094	0.459636	0.460185	0.457279	0.464486	0.465004	0.461574	0.457869	0.459607	0.463713	0.459401	0.461008	0.464387	0.461092	0.459617	0.464177	0.460374	0.461238	0.468485	0.459607	0.460897	0.463682	0.458798	0.467457	0.459123	0.462146
BIX-01294	0.449025	0.449036	0.447156	0.444346	0.452613	0.447236	0.458721	0.439593	0.444107	0.449245	0.446876	0.444434	0.44523	0.448857	0.448397	0.461533	0.456727	0.444754	0.453675	0.448987	0.444388	0.453611	0.452167	0.451601	0.442497	0.444055	0.446273	0.42779	0.4616	0.451263	0.445091	0.448189	0.446102	0.436636	0.449979	0.455078	0.447685	0.442259	0.454915	0.454204	0.441368	0.468283	0.447743	0.44152	0.448961	0.44699	0.452445	0.442668	0.449654
panobinostat	0.166716	0.180733	0.198856	0.177815	0.196389	0.205841	0.208135	0.188026	0.198529	0.190523	0.198706	0.195334	0.150968	0.199702	0.177171	0.201507	0.175004	0.191336	0.166689	0.194382	0.185524	0.176299	0.135145	0.206098	0.157498	0.191958	0.193119	0.13874	0.191485	0.178919	0.195896	0.192968	0.178032	0.188804	0.176447	0.194422	0.179811	0.201727	0.183131	0.194471	0.132428	0.2005	0.183692	0.174574	0.186425	0.191173	0.143882	0.178463	0.184557
IC-87114	0.500353	0.500469	0.493684	0.499311	0.4934	0.492357	0.490763	0.496811	0.498301	0.497251	0.49685	0.5002	0.507675	0.496247	0.500628	0.494211	0.497137	0.499098	0.498134	0.498548	0.495823	0.498748	0.505838	0.49407	0.501013	0.500755	0.490939	0.507309	0.494462	0.497302	0.499273	0.494107	0.498681	0.498158	0.496598	0.491389	0.496535	0.494945	0.497444	0.498441	0.504252	0.493365	0.494838	0.498498	0.494919	0.495649	0.504006	0.495051	0.501351
ciclosporin	0.476103	0.475539	0.479686	0.474697	0.474924	0.478103	0.471468	0.473562	0.476433	0.477937	0.474968	0.47454	0.477901	0.474574	0.475995	0.481754	0.47175	0.469806	0.475466	0.475084	0.476814	0.474113	0.473584	0.476316	0.474948	0.478431	0.473369	0.47343	0.47445	0.479003	0.469112	0.478221	0.476696	0.477469	0.475447	0.478821	0.47418	0.478772	0.482457	0.477401	0.47229	0.47981	0.47493	0.477344	0.477802	0.474618	0.469244	0.476116	0.473757
vorinostat	0.396044	0.398343	0.412403	0.408264	0.409849	0.409288	0.411639	0.408124	0.409553	0.404748	0.401039	0.408177	0.391802	0.411428	0.399422	0.416778	0.407669	0.394971	0.400213	0.408775	0.403624	0.409267	0.38289	0.412655	0.393446	0.404779	0.415273	0.37484	0.41051	0.403723	0.399823	0.406721	0.404063	0.399548	0.405981	0.406992	0.403444	0.409629	0.400227	0.414112	0.386776	0.417618	0.404273	0.402894	0.409741	0.406433	0.379862	0.395656	0.400658
sirolimus	0.369135	0.387029	0.407479	0.395686	0.396253	0.37623	0.365395	0.364858	0.397628	0.364259	0.395028	0.39193	0.388469	0.388786	0.396134	0.37612	0.375158	0.384065	0.374946	0.397021	0.382391	0.385717	0.386103	0.401385	0.383699	0.377324	0.384769	0.332179	0.401435	0.384489	0.372017	0.383989	0.393671	0.375989	0.397315	0.377945	0.391307	0.378523	0.398826	0.399345	0.382846	0.378798	0.37659	0.378147	0.382642	0.374045	0.359247	0.356153	0.404125
KU-55933	0.456875	0.458729	0.458969	0.460588	0.46168	0.461204	0.460171	0.457734	0.460401	0.46069	0.459824	0.460464	0.455367	0.458121	0.460597	0.458301	0.459665	0.460609	0.456145	0.459462	0.459518	0.457292	0.455526	0.459288	0.458882	0.459181	0.459689	0.456591	0.458573	0.458541	0.463724	0.461848	0.458486	0.458806	0.460374	0.458816	0.458316	0.459993	0.462788	0.460135	0.45553	0.457902	0.459617	0.458127	0.458367	0.456787	0.457705	0.459412	0.460689
AM-580	0.448049	0.443647	0.455869	0.452691	0.447831	0.437921	0.427742	0.451787	0.449244	0.438997	0.457686	0.453668	0.468814	0.45531	0.452797	0.450749	0.458821	0.435438	0.444759	0.445072	0.448332	0.452112	0.467489	0.4643	0.454651	0.439777	0.448294	0.424703	0.452724	0.455582	0.438723	0.448459	0.457834	0.418266	0.454908	0.452755	0.44754	0.441571	0.462095	0.4591	0.455803	0.44097	0.44527	0.440696	0.4508	0.448743	0.467589	0.43511	0.447594
PDMP	0.446288	0.444256	0.448375	0.447764	0.445885	0.445627	0.444926	0.444905	0.44651	0.446221	0.446912	0.445921	0.451406	0.447675	0.445874	0.451377	0.444298	0.440846	0.445948	0.444935	0.446866	0.447961	0.446171	0.450957	0.448153	0.443127	0.447137	0.4385	0.446749	0.447537	0.444236	0.448072	0.450027	0.439659	0.44907	0.44965	0.44352	0.447072	0.453255	0.44801	0.444627	0.446591	0.448616	0.44447	0.448237	0.448453	0.441662	0.4429	0.445111
BRD5468	0.452696	0.444891	0.454833	0.465893	0.460773	0.438157	0.473009	0.446982	0.448225	0.449519	0.473329	0.457787	0.473576	0.459396	0.464941	0.465699	0.466238	0.458397	0.460573	0.457282	0.44342	0.465596	0.483728	0.458159	0.454491	0.451607	0.448434	0.448722	0.468984	0.459189	0.465432	0.446697	0.462656	0.430391	0.456499	0.461969	0.451798	0.44181	0.467064	0.467491	0.448363	0.491209	0.445496	0.443728	0.456668	0.445747	0.491996	0.44346	0.462477
NSC48300	0.465216	0.467852	0.474893	0.473539	0.475246	0.469953	0.475002	0.471506	0.472091	0.464949	0.473669	0.473339	0.471843	0.473378	0.470819	0.470469	0.48274	0.478387	0.46148	0.475778	0.471388	0.469022	0.481985	0.477815	0.474791	0.467942	0.472492	0.47016	0.472949	0.473599	0.473663	0.477272	0.471848	0.465883	0.471177	0.469439	0.471725	0.469024	0.47853	0.471063	0.464083	0.468897	0.470127	0.463708	0.466041	0.471334	0.484776	0.46979	0.475362
isoevodiamine	0.412343	0.423054	0.430176	0.42188	0.42983	0.421989	0.411849	0.422996	0.430594	0.420132	0.422965	0.432777	0.417775	0.432048	0.424726	0.432851	0.432773	0.414439	0.418877	0.427143	0.427884	0.429259	0.419759	0.431657	0.414757	0.423437	0.431728	0.394582	0.425999	0.429367	0.416633	0.426576	0.430627	0.399912	0.418058	0.422235	0.426726	0.427243	0.438577	0.431808	0.41053	0.431905	0.425557	0.41837	0.423487	0.428989	0.403854	0.407001	0.416945
UNC0638	0.45887	0.452557	0.462382	0.462435	0.459204	0.450166	0.471202	0.452436	0.449911	0.451241	0.459294	0.463315	0.454022	0.460078	0.458447	0.474232	0.46782	0.460219	0.454373	0.451654	0.450513	0.458111	0.467789	0.467717	0.456361	0.446608	0.465399	0.435797	0.47423	0.455227	0.470983	0.455777	0.458762	0.442271	0.46156	0.461366	0.454313	0.450172	0.46933	0.46803	0.456185	0.476722	0.453109	0.444043	0.454196	0.457501	0.483269	0.449192	0.459207
cucurbitacin I	0.285715	0.288413	0.315018	0.2769	0.311985	0.315358	0.282699	0.280482	0.306517	0.305759	0.317215	0.288062	0.310674	0.296891	0.300331	0.321398	0.309155	0.268821	0.310064	0.301548	0.299107	0.300132	0.277448	0.324009	0.281212	0.296932	0.30519	0.249094	0.346772	0.311102	0.256641	0.300671	0.308317	0.267199	0.305181	0.330129	0.299872	0.302606	0.357285	0.299877	0.262988	0.357552	0.28577	0.285297	0.319479	0.301195	0.291203	0.282007	0.287159
BRD-K50799972	0.485365	0.485436	0.485401	0.485351	0.485445	0.48552	0.485347	0.485391	0.485444	0.485494	0.48532	0.485351	0.485327	0.485377	0.485344	0.485294	0.485298	0.4854	0.485374	0.48544	0.485382	0.485382	0.485261	0.485381	0.485299	0.485415	0.485405	0.485494	0.485308	0.485411	0.485293	0.4854	0.485389	0.485488	0.485378	0.485362	0.485405	0.485411	0.485359	0.485302	0.485227	0.485284	0.485402	0.485455	0.485473	0.485362	0.485029	0.485429	0.485368
BRD-K17060750	0.498209	0.500701	0.498591	0.499126	0.501787	0.501788	0.500029	0.499207	0.501168	0.501839	0.499815	0.49882	0.497543	0.50067	0.499506	0.494498	0.499595	0.501874	0.498951	0.500422	0.50087	0.499927	0.495993	0.498371	0.496955	0.500509	0.499505	0.501481	0.499902	0.499321	0.498594	0.498792	0.496137	0.502914	0.498165	0.49727	0.500337	0.500201	0.497577	0.498398	0.4959	0.498555	0.501365	0.500283	0.500117	0.498788	0.494959	0.500875	0.500557
barasertib	0.438963	0.432561	0.471328	0.43473	0.443565	0.452538	0.4235	0.423296	0.434926	0.431553	0.420747	0.435804	0.448086	0.454653	0.419902	0.475605	0.446454	0.409788	0.421956	0.43711	0.41677	0.440319	0.424622	0.474145	0.451353	0.436216	0.458868	0.38002	0.457825	0.457929	0.438558	0.443383	0.46645	0.400651	0.458178	0.458477	0.450363	0.443907	0.455254	0.468106	0.407887	0.476019	0.429087	0.407959	0.461298	0.475509	0.403591	0.395949	0.437093
entinostat	0.374036	0.385868	0.384552	0.379006	0.394145	0.391714	0.398833	0.383248	0.391005	0.390009	0.380608	0.392496	0.378033	0.392792	0.376363	0.38748	0.38632	0.374492	0.384112	0.387811	0.385771	0.388434	0.354192	0.395937	0.372337	0.383641	0.386973	0.349814	0.390179	0.378145	0.382152	0.379754	0.38312	0.383869	0.381727	0.378932	0.381955	0.391977	0.375945	0.388866	0.362639	0.390684	0.389035	0.385925	0.389569	0.38833	0.353092	0.371694	0.3854
linifanib	0.414681	0.416588	0.419004	0.417688	0.419533	0.42053	0.418933	0.418346	0.41909	0.419722	0.416687	0.415949	0.414298	0.41963	0.416444	0.416669	0.416969	0.416908	0.416403	0.417557	0.418838	0.417411	0.411624	0.420762	0.41592	0.416814	0.420422	0.412481	0.416607	0.418384	0.415679	0.419803	0.417561	0.417002	0.417731	0.417517	0.417389	0.419153	0.41579	0.418086	0.411723	0.418314	0.420126	0.417346	0.418357	0.418638	0.407174	0.417927	0.41594
veliparib	0.489478	0.490686	0.49065	0.487534	0.489226	0.48653	0.491787	0.483739	0.488457	0.490852	0.483033	0.487501	0.489664	0.489349	0.483323	0.494602	0.486738	0.487406	0.48959	0.491197	0.485998	0.488454	0.490227	0.489509	0.488911	0.486863	0.487292	0.498812	0.489699	0.489457	0.488236	0.488693	0.489144	0.487704	0.486728	0.494162	0.486894	0.488298	0.49353	0.484751	0.489309	0.491644	0.482117	0.4899	0.490522	0.486816	0.488021	0.489274	0.487035
saracatinib	0.430248	0.432902	0.42964	0.415296	0.428397	0.433566	0.398685	0.418047	0.419315	0.430027	0.427401	0.420965	0.425042	0.418511	0.425442	0.447688	0.39852	0.409054	0.4175	0.42073	0.417746	0.433609	0.410877	0.412657	0.422044	0.445834	0.425056	0.403825	0.416152	0.425308	0.409155	0.421125	0.424947	0.431456	0.433394	0.430564	0.417981	0.424403	0.426176	0.430898	0.424798	0.407966	0.414222	0.430155	0.434117	0.411917	0.411541	0.421024	0.415291
afatinib	0.327268	0.355599	0.354319	0.322711	0.345902	0.367009	0.311923	0.335869	0.340902	0.35198	0.331658	0.341912	0.321135	0.346906	0.3264	0.387341	0.305182	0.32731	0.326317	0.335471	0.340845	0.352438	0.282253	0.327929	0.333262	0.370103	0.351908	0.285373	0.365633	0.341973	0.329091	0.34313	0.319126	0.351752	0.347698	0.381631	0.333353	0.353797	0.347028	0.354411	0.329295	0.329529	0.316577	0.351488	0.355742	0.342127	0.319868	0.345649	0.327917
canertinib	0.386581	0.405905	0.404443	0.380908	0.392757	0.412303	0.376578	0.392672	0.387567	0.388361	0.414368	0.401794	0.374503	0.389569	0.393607	0.441933	0.372715	0.380219	0.381459	0.390571	0.385792	0.401291	0.360243	0.388628	0.404391	0.411999	0.394755	0.332491	0.400578	0.391933	0.390968	0.381443	0.377016	0.390264	0.414684	0.419446	0.382927	0.400208	0.392548	0.408155	0.394959	0.374159	0.364332	0.391379	0.386545	0.381252	0.41535	0.375022	0.395767
obatoclax	0.290021	0.299224	0.297341	0.305998	0.301393	0.285027	0.29985	0.290119	0.290402	0.302626	0.304858	0.316904	0.299606	0.315411	0.314891	0.313372	0.311802	0.276892	0.295417	0.293354	0.284136	0.301022	0.296366	0.302267	0.29612	0.280048	0.299656	0.252338	0.291562	0.294846	0.29218	0.282588	0.307615	0.259445	0.30868	0.296021	0.295432	0.280295	0.302176	0.30447	0.30622	0.298268	0.27951	0.284541	0.295525	0.294997	0.303614	0.259579	0.288894
masitinib	0.445737	0.444619	0.451355	0.449347	0.449353	0.446565	0.448611	0.44635	0.447015	0.446503	0.447116	0.44691	0.444135	0.448102	0.447528	0.448586	0.447808	0.44683	0.444731	0.447791	0.446685	0.445101	0.447431	0.451166	0.445305	0.442943	0.450601	0.440134	0.449685	0.44774	0.44792	0.450016	0.450292	0.442887	0.449966	0.448678	0.444643	0.44805	0.452206	0.449532	0.442686	0.449823	0.448046	0.44361	0.446994	0.448141	0.444589	0.444914	0.446679
ZSTK474	0.396501	0.396873	0.400075	0.395713	0.394228	0.391104	0.390716	0.39437	0.395812	0.390914	0.395103	0.395649	0.403287	0.396148	0.39585	0.405134	0.392032	0.38669	0.398213	0.396253	0.391628	0.396952	0.398336	0.398284	0.39611	0.39328	0.394536	0.391316	0.395818	0.39803	0.38668	0.395324	0.402583	0.386889	0.398595	0.3992	0.395842	0.394673	0.400954	0.397245	0.397286	0.398173	0.391608	0.39523	0.397975	0.39245	0.392597	0.386803	0.393864
brivanib	0.479323	0.4778	0.486532	0.488122	0.487305	0.486021	0.487416	0.484833	0.490291	0.490162	0.488079	0.486426	0.479855	0.492779	0.488976	0.474444	0.486546	0.483581	0.481878	0.486454	0.490819	0.48208	0.482422	0.494394	0.48113	0.480862	0.495668	0.465601	0.484794	0.487688	0.482776	0.49269	0.484635	0.484186	0.484284	0.485113	0.485018	0.487672	0.48364	0.485872	0.478375	0.493007	0.496111	0.483324	0.484017	0.494454	0.469955	0.487149	0.482382
GDC-0879	0.48649	0.487667	0.485263	0.487885	0.484234	0.483229	0.487128	0.486568	0.485735	0.488089	0.484096	0.487431	0.487399	0.486914	0.485577	0.484118	0.487857	0.487121	0.487111	0.486011	0.48536	0.487033	0.486092	0.486887	0.485694	0.48466	0.48634	0.489113	0.486172	0.485323	0.490485	0.485289	0.486626	0.485368	0.486097	0.485553	0.485644	0.48496	0.488083	0.48693	0.487829	0.487504	0.485486	0.485812	0.486122	0.487017	0.487167	0.485651	0.485859
NVP-TAE684	0.366007	0.356092	0.367536	0.347518	0.353316	0.356002	0.369354	0.359535	0.34391	0.350925	0.338727	0.360025	0.385451	0.354231	0.340376	0.362138	0.372839	0.359671	0.354342	0.352457	0.34134	0.356892	0.353061	0.36402	0.356333	0.348615	0.356317	0.353868	0.351887	0.358839	0.381558	0.351283	0.359092	0.328245	0.356996	0.38173	0.352492	0.352035	0.371721	0.365542	0.333888	0.364683	0.341677	0.336504	0.351169	0.349455	0.365127	0.349611	0.348788
SNS-032	0.303733	0.322904	0.326535	0.299379	0.32083	0.311079	0.31791	0.301607	0.323148	0.3176	0.321439	0.332919	0.304373	0.340075	0.318113	0.325188	0.33581	0.315751	0.296134	0.325249	0.339746	0.308393	0.312401	0.340531	0.287461	0.311982	0.301797	0.255575	0.369545	0.321932	0.339145	0.327304	0.302011	0.300653	0.285977	0.333314	0.337731	0.316717	0.330073	0.3377	0.292047	0.326284	0.322704	0.301106	0.30806	0.31195	0.305904	0.299825	0.343569
PLX-4720	0.486522	0.472224	0.489461	0.478932	0.480116	0.459896	0.475199	0.478827	0.475257	0.474681	0.492579	0.492842	0.507367	0.490117	0.483605	0.483229	0.494029	0.471871	0.478379	0.479638	0.476524	0.490804	0.511043	0.48613	0.48647	0.47308	0.464099	0.480177	0.478241	0.47844	0.502719	0.480427	0.497202	0.462814	0.493606	0.484114	0.480717	0.469408	0.50671	0.485256	0.487347	0.460874	0.4711	0.474244	0.480238	0.477788	0.531331	0.464809	0.482421
TGX-221	0.461874	0.461237	0.460217	0.460857	0.459794	0.458992	0.459946	0.460189	0.460018	0.459548	0.461315	0.461536	0.463198	0.459907	0.461417	0.461381	0.460978	0.460358	0.461379	0.460793	0.459577	0.460617	0.463762	0.459219	0.461081	0.460144	0.459176	0.463826	0.460655	0.460371	0.460729	0.459595	0.461535	0.459629	0.461082	0.460837	0.460389	0.459717	0.462398	0.460261	0.46289	0.459858	0.459031	0.460632	0.460283	0.459557	0.465409	0.459619	0.460958
KU-0063794	0.393391	0.396816	0.402886	0.409442	0.405418	0.390212	0.401288	0.399593	0.398954	0.394238	0.399899	0.401073	0.406776	0.403069	0.402327	0.40865	0.407302	0.392554	0.396541	0.396049	0.392023	0.40909	0.408456	0.413296	0.401801	0.393992	0.403905	0.368318	0.406851	0.39992	0.402631	0.398978	0.412793	0.379144	0.409723	0.393133	0.397864	0.395722	0.403196	0.411146	0.402078	0.409877	0.398121	0.387768	0.401255	0.394588	0.413636	0.377426	0.403055
TG-100-115	0.481159	0.47612	0.479873	0.475769	0.481975	0.477497	0.493973	0.478313	0.474	0.471347	0.485207	0.482247	0.482208	0.479778	0.477744	0.486404	0.483933	0.484864	0.479197	0.47981	0.475344	0.478041	0.488153	0.479585	0.481193	0.473675	0.481033	0.481966	0.480133	0.476267	0.478612	0.480588	0.47936	0.474432	0.485438	0.482183	0.476629	0.475764	0.482664	0.480283	0.481251	0.476826	0.472951	0.474547	0.473048	0.474073	0.502409	0.47496	0.483285
SU11274	0.459134	0.458448	0.472308	0.473275	0.464393	0.467223	0.451753	0.463584	0.476231	0.477438	0.472335	0.463243	0.463978	0.470866	0.473378	0.450274	0.462645	0.452294	0.467266	0.465973	0.475618	0.467163	0.453895	0.481073	0.464182	0.458872	0.474368	0.436816	0.468473	0.470486	0.45121	0.46545	0.469327	0.449838	0.475345	0.46277	0.465267	0.462105	0.458947	0.470609	0.461121	0.473444	0.474367	0.461059	0.469575	0.468487	0.435774	0.458303	0.46575
BRD-K88742110	0.478186	0.478482	0.486499	0.48982	0.492351	0.489108	0.495704	0.483812	0.487265	0.486773	0.491485	0.485985	0.474483	0.490036	0.48114	0.482523	0.491565	0.488428	0.481018	0.486236	0.48712	0.484433	0.478701	0.492146	0.484612	0.479804	0.491146	0.474661	0.491204	0.482898	0.488635	0.490605	0.486495	0.481418	0.488851	0.486757	0.482621	0.486215	0.483214	0.484866	0.479394	0.4964	0.491297	0.480767	0.486134	0.489699	0.485705	0.488124	0.484988
BRD8899	0.496819	0.496607	0.49627	0.495229	0.497141	0.496293	0.496761	0.495381	0.49582	0.494601	0.498532	0.494261	0.500329	0.496796	0.496865	0.49898	0.495891	0.494849	0.498628	0.495496	0.497183	0.497946	0.495785	0.496088	0.495878	0.496636	0.495155	0.496279	0.497337	0.496728	0.490957	0.495495	0.497813	0.495766	0.496093	0.498236	0.497223	0.496016	0.497491	0.495526	0.495709	0.497636	0.495124	0.496639	0.496931	0.495505	0.496762	0.496881	0.496963
EX-527	0.502365	0.501423	0.504785	0.504139	0.504	0.502284	0.505732	0.504601	0.502975	0.502035	0.506024	0.504141	0.502546	0.504572	0.504136	0.505556	0.506254	0.502096	0.503854	0.50245	0.503144	0.504274	0.504725	0.505258	0.504701	0.500895	0.505091	0.49588	0.504607	0.503854	0.502837	0.504849	0.504068	0.499106	0.504839	0.503667	0.50289	0.503139	0.503336	0.505061	0.502884	0.505228	0.504202	0.501514	0.502056	0.50449	0.505876	0.501636	0.502626
NPC-26	0.486703	0.489077	0.491333	0.488347	0.488235	0.487794	0.487104	0.489219	0.48943	0.489325	0.489638	0.48963	0.488978	0.48982	0.489902	0.487951	0.487745	0.485972	0.488689	0.487805	0.487412	0.487761	0.487229	0.490469	0.486607	0.486289	0.489799	0.483745	0.486386	0.488692	0.48408	0.48829	0.488975	0.48519	0.489478	0.485893	0.488116	0.486502	0.490512	0.489634	0.486287	0.486937	0.487513	0.487713	0.488249	0.486366	0.480706	0.484762	0.487474
1S,3R-RSL-3	0.266272	0.230838	0.31157	0.291484	0.278698	0.224958	0.280485	0.251759	0.251148	0.225914	0.307078	0.222328	0.314981	0.255259	0.258504	0.280128	0.266393	0.223814	0.280677	0.258635	0.259948	0.259625	0.25517	0.291185	0.314805	0.251976	0.268716	0.205459	0.263126	0.264412	0.218848	0.266636	0.268883	0.220756	0.292717	0.274297	0.260825	0.256109	0.338445	0.28875	0.282007	0.303035	0.24663	0.230948	0.295663	0.265902	0.26136	0.243845	0.260261
SCH-529074	0.425457	0.421385	0.42829	0.423362	0.429145	0.426808	0.430878	0.424645	0.424271	0.424328	0.42357	0.427669	0.427248	0.425449	0.423931	0.431193	0.429846	0.419386	0.427246	0.423145	0.42376	0.429681	0.42425	0.430529	0.419965	0.421458	0.424005	0.420502	0.428294	0.425073	0.424511	0.426547	0.43148	0.418793	0.432161	0.428172	0.42134	0.426337	0.428135	0.425904	0.418972	0.42838	0.428219	0.422464	0.431382	0.427755	0.422492	0.422076	0.420983
StemRegenin 1	0.449637	0.452581	0.455447	0.453273	0.454372	0.456179	0.449116	0.449756	0.458125	0.456662	0.454541	0.452645	0.447486	0.454922	0.45499	0.454764	0.448578	0.446905	0.455238	0.45475	0.457688	0.452995	0.442672	0.455113	0.447765	0.452435	0.454329	0.441304	0.4532	0.456662	0.442185	0.457954	0.45289	0.451452	0.453962	0.451753	0.455044	0.454683	0.453408	0.455031	0.448991	0.452109	0.456416	0.453911	0.455592	0.455599	0.430209	0.451862	0.451939
FQI-2	0.394751	0.408773	0.430258	0.41315	0.410828	0.407715	0.401112	0.403343	0.41531	0.41663	0.406029	0.427651	0.401227	0.425109	0.406872	0.426914	0.419031	0.409829	0.399168	0.414286	0.410575	0.400013	0.394571	0.428886	0.397381	0.396694	0.421046	0.381551	0.412843	0.410441	0.420573	0.412399	0.412297	0.383026	0.408259	0.416752	0.416025	0.410187	0.422684	0.421322	0.396836	0.426255	0.403946	0.395211	0.402939	0.416389	0.385549	0.38868	0.407423
ML210	0.361587	0.319766	0.360415	0.351731	0.338499	0.288733	0.345789	0.320282	0.313871	0.283884	0.365669	0.308481	0.427082	0.314484	0.319909	0.366724	0.366293	0.294009	0.356061	0.338336	0.337756	0.352101	0.379725	0.367375	0.362992	0.316475	0.312563	0.302859	0.356339	0.353946	0.306839	0.334196	0.35528	0.283559	0.376478	0.349311	0.352045	0.313146	0.399481	0.349195	0.365962	0.366668	0.32106	0.309242	0.366013	0.323283	0.361969	0.309281	0.321325
PX-12	0.456822	0.456042	0.47241	0.463521	0.466021	0.46125	0.479183	0.458306	0.455832	0.453257	0.459946	0.46208	0.458005	0.461459	0.455666	0.476485	0.470269	0.467607	0.458237	0.461096	0.451394	0.458499	0.459945	0.477605	0.459376	0.450317	0.469987	0.443959	0.470871	0.457057	0.468401	0.46821	0.464718	0.446389	0.470001	0.468633	0.463162	0.454499	0.462602	0.467375	0.450424	0.472852	0.455724	0.450847	0.461956	0.457206	0.463927	0.45473	0.464048
GANT-61	0.475276	0.466594	0.472222	0.46552	0.470438	0.467207	0.478344	0.468263	0.462078	0.464996	0.474642	0.479096	0.467954	0.466968	0.476799	0.48591	0.474967	0.476411	0.463648	0.469865	0.465491	0.471153	0.485601	0.478034	0.473199	0.464982	0.476067	0.458318	0.481184	0.463853	0.477565	0.469287	0.467408	0.467214	0.475528	0.46973	0.462673	0.462655	0.476244	0.476368	0.472769	0.47543	0.463347	0.459231	0.462563	0.465482	0.501562	0.46791	0.47517
PL-DI	0.361513	0.37251	0.382925	0.36726	0.383561	0.378033	0.38226	0.366392	0.373363	0.374001	0.37392	0.377092	0.351285	0.386953	0.364814	0.374021	0.372924	0.382851	0.358245	0.37991	0.376995	0.369318	0.358906	0.387502	0.356555	0.369844	0.389106	0.352509	0.379551	0.368741	0.369008	0.378978	0.374481	0.369792	0.370993	0.370089	0.369736	0.371918	0.381902	0.374601	0.360369	0.384223	0.377572	0.361883	0.368367	0.375981	0.376377	0.369228	0.373386
TW-37	0.399264	0.409231	0.421492	0.423052	0.417759	0.407886	0.407223	0.418807	0.419792	0.411724	0.422972	0.424307	0.417336	0.424337	0.422378	0.411294	0.420475	0.402825	0.414939	0.413566	0.420593	0.421195	0.414659	0.433669	0.416565	0.400209	0.422354	0.380111	0.413117	0.413556	0.410894	0.414159	0.421877	0.389091	0.418711	0.4112	0.413221	0.406154	0.412148	0.422062	0.417168	0.419131	0.421088	0.40426	0.40827	0.418142	0.403729	0.398239	0.408024
AZD8055	0.275005	0.290366	0.287446	0.29793	0.303341	0.283058	0.285973	0.293004	0.293409	0.283271	0.285782	0.294577	0.295228	0.300032	0.289935	0.279769	0.306397	0.291143	0.274654	0.283291	0.280791	0.297905	0.282916	0.297857	0.282335	0.282478	0.287453	0.245989	0.303546	0.282845	0.303547	0.280744	0.299439	0.273139	0.281795	0.284709	0.284813	0.284583	0.282366	0.29418	0.27612	0.296048	0.291561	0.272417	0.283248	0.286961	0.295246	0.266743	0.29612
CHM-1	0.397584	0.418782	0.424612	0.405919	0.417994	0.415049	0.39853	0.410962	0.420072	0.427452	0.407612	0.423744	0.411616	0.425328	0.41264	0.427189	0.420724	0.397701	0.415881	0.415338	0.414398	0.414366	0.398091	0.429353	0.395122	0.405567	0.417871	0.371371	0.43301	0.41911	0.405997	0.410611	0.421917	0.387608	0.407587	0.427681	0.417175	0.418085	0.421293	0.421171	0.4043	0.429158	0.421106	0.409795	0.415851	0.420614	0.379832	0.38938	0.405769
ML239	0.471468	0.477395	0.476716	0.478753	0.47559	0.471992	0.483241	0.474201	0.477888	0.475909	0.485222	0.479107	0.479641	0.477	0.478753	0.470408	0.48207	0.476455	0.476987	0.47778	0.476924	0.470479	0.479505	0.48071	0.476609	0.472371	0.472425	0.464492	0.471171	0.473654	0.476499	0.480925	0.474988	0.469109	0.473754	0.469058	0.480641	0.474021	0.476382	0.478382	0.472693	0.477031	0.473783	0.468122	0.465252	0.469275	0.477115	0.469421	0.481414
apicidin	0.336067	0.338793	0.34898	0.335414	0.355028	0.344922	0.349076	0.346043	0.34121	0.329942	0.353698	0.352224	0.345191	0.35708	0.338889	0.358468	0.3499	0.332513	0.336423	0.34058	0.338865	0.342697	0.322076	0.353407	0.32831	0.345996	0.340859	0.291182	0.352232	0.336837	0.335024	0.334569	0.344255	0.334181	0.334302	0.346983	0.344495	0.342647	0.335536	0.342505	0.321418	0.343802	0.338366	0.337675	0.348071	0.330795	0.34178	0.320902	0.346716
fumonisin B1	0.488788	0.489261	0.488844	0.48762	0.4874	0.486233	0.48674	0.486649	0.488224	0.48649	0.491279	0.489416	0.494419	0.488592	0.489864	0.490698	0.48659	0.487816	0.489092	0.489385	0.488962	0.488233	0.492897	0.485993	0.488026	0.489616	0.486955	0.49404	0.488216	0.48858	0.486814	0.485572	0.489822	0.486706	0.488438	0.489793	0.489254	0.485871	0.493919	0.488002	0.490704	0.490402	0.484702	0.48834	0.487681	0.485167	0.497293	0.486353	0.489474
JQ-1	0.377606	0.376984	0.397864	0.385395	0.390105	0.391715	0.395058	0.377178	0.384328	0.392566	0.378104	0.385222	0.371399	0.388854	0.379663	0.400266	0.385355	0.37398	0.38382	0.386326	0.37934	0.385879	0.377817	0.397777	0.372167	0.379226	0.388177	0.371962	0.388771	0.382428	0.383424	0.39445	0.387771	0.370424	0.393834	0.401137	0.378549	0.392443	0.403994	0.390784	0.362735	0.40218	0.374501	0.376648	0.391185	0.386964	0.358298	0.379932	0.373202
BRD-K51490254	0.490591	0.495449	0.495128	0.496717	0.499057	0.49516	0.503518	0.498231	0.494395	0.496465	0.502465	0.496657	0.495539	0.498848	0.496786	0.499947	0.501007	0.495916	0.497896	0.49344	0.493497	0.499856	0.498893	0.501578	0.49539	0.490661	0.499232	0.477431	0.502787	0.496463	0.494463	0.497493	0.495662	0.485989	0.496698	0.495972	0.495117	0.491776	0.496721	0.49973	0.49103	0.502459	0.499878	0.491668	0.492054	0.494283	0.499609	0.491136	0.498833
BRD-K85133207	0.48244	0.483419	0.484773	0.482209	0.485565	0.486428	0.486591	0.484989	0.484303	0.486001	0.481668	0.48187	0.480351	0.485192	0.482321	0.485274	0.482072	0.482065	0.484365	0.483479	0.483471	0.483136	0.480614	0.485883	0.480982	0.483275	0.484619	0.481962	0.484362	0.482764	0.479262	0.484351	0.48559	0.485378	0.48294	0.484032	0.481988	0.484829	0.481508	0.481556	0.477977	0.483353	0.485007	0.485106	0.485056	0.48196	0.474793	0.483189	0.481485
Merck60	0.438287	0.447401	0.443783	0.433774	0.454714	0.445144	0.4465	0.442398	0.447185	0.440172	0.438962	0.454657	0.437332	0.456847	0.4329	0.456793	0.44665	0.436871	0.436112	0.449189	0.440279	0.44621	0.421217	0.440545	0.430513	0.447766	0.446578	0.401104	0.453723	0.4374	0.430006	0.436413	0.433378	0.443837	0.433363	0.440139	0.447123	0.439862	0.427873	0.441906	0.433831	0.441672	0.443777	0.439898	0.447348	0.44495	0.414796	0.427559	0.4524
DNMDP	0.473654	0.462904	0.462359	0.458634	0.456854	0.44295	0.460087	0.463106	0.464596	0.458212	0.468078	0.487569	0.500807	0.466692	0.479116	0.483907	0.479594	0.444427	0.468226	0.465927	0.459703	0.475894	0.482609	0.464238	0.462792	0.452665	0.446272	0.491986	0.463197	0.459652	0.467427	0.44896	0.470793	0.451904	0.460206	0.478629	0.465282	0.460877	0.482596	0.462202	0.482082	0.468673	0.454441	0.473908	0.458633	0.454551	0.506696	0.436782	0.447923
BMS-345541	0.399264	0.412503	0.411168	0.412665	0.416374	0.410291	0.415285	0.410043	0.417707	0.410218	0.411667	0.417753	0.4092	0.41942	0.409675	0.412382	0.420454	0.409799	0.405577	0.41442	0.414877	0.41234	0.41287	0.417586	0.409534	0.403379	0.412187	0.389798	0.428272	0.40901	0.425035	0.415398	0.415667	0.398653	0.40576	0.410941	0.412372	0.408757	0.414242	0.415422	0.411627	0.411246	0.415756	0.402858	0.407752	0.421478	0.408662	0.402922	0.416035
CAY10576	0.484805	0.489048	0.481276	0.48612	0.486635	0.485162	0.483276	0.486825	0.487862	0.486867	0.48276	0.4876	0.483081	0.486441	0.487885	0.476933	0.488327	0.491841	0.484146	0.486663	0.487852	0.486278	0.486522	0.483484	0.481865	0.483629	0.490231	0.485396	0.488504	0.483569	0.48621	0.485606	0.484872	0.485942	0.485293	0.48202	0.482721	0.483782	0.486226	0.483155	0.479014	0.482247	0.486419	0.48424	0.483387	0.484584	0.48362	0.488222	0.486768
vincristine	0.228899	0.298459	0.276	0.241578	0.271163	0.271835	0.245892	0.247766	0.290111	0.291515	0.268737	0.307161	0.256869	0.295803	0.276658	0.291198	0.303755	0.255002	0.253641	0.281302	0.276749	0.25609	0.227974	0.295944	0.217878	0.261421	0.269455	0.172755	0.298418	0.281356	0.261975	0.271386	0.258175	0.218444	0.237778	0.280121	0.299689	0.270084	0.287387	0.277308	0.212311	0.281471	0.259304	0.240741	0.257266	0.282634	0.180948	0.208045	0.266588
cytarabine hydrochloride	0.389781	0.411989	0.431999	0.420425	0.412322	0.402686	0.423283	0.396733	0.425135	0.403802	0.391242	0.419416	0.420086	0.440194	0.393636	0.411703	0.433603	0.413061	0.421524	0.413555	0.420798	0.415949	0.397165	0.462875	0.400007	0.385497	0.434833	0.367976	0.445642	0.396291	0.42568	0.417304	0.433768	0.374714	0.415201	0.422703	0.41068	0.394414	0.421433	0.426369	0.415026	0.454546	0.412439	0.3846	0.405157	0.444634	0.388832	0.388607	0.411303
Repligen 136	0.480994	0.478011	0.485401	0.482652	0.488654	0.488576	0.491067	0.481235	0.482743	0.482877	0.477316	0.484047	0.475308	0.480908	0.475209	0.486123	0.482824	0.48312	0.479096	0.487885	0.482985	0.480061	0.477111	0.491627	0.476666	0.479781	0.487257	0.474068	0.484275	0.480377	0.484342	0.489701	0.481097	0.481431	0.487828	0.484014	0.480877	0.486053	0.483076	0.481736	0.472689	0.490352	0.485019	0.480795	0.486505	0.48782	0.470685	0.483922	0.479594
nintedanib	0.455185	0.451472	0.465289	0.46079	0.45676	0.448193	0.454197	0.456311	0.453012	0.448203	0.466537	0.456307	0.462328	0.462581	0.463445	0.462391	0.458594	0.450736	0.45665	0.456051	0.453911	0.454533	0.459967	0.462524	0.457792	0.446538	0.464848	0.438398	0.456306	0.460427	0.45229	0.454371	0.462684	0.438822	0.462826	0.458968	0.454523	0.452823	0.465256	0.465318	0.456817	0.461333	0.452424	0.446686	0.453055	0.452043	0.459891	0.445478	0.453745
crizotinib	0.387786	0.386051	0.391005	0.379115	0.382628	0.393273	0.387746	0.380702	0.384154	0.394651	0.37607	0.379934	0.386673	0.381851	0.376854	0.380859	0.38016	0.386327	0.380791	0.388511	0.382511	0.381073	0.370988	0.383941	0.373029	0.381533	0.38523	0.389625	0.386588	0.389114	0.389385	0.392716	0.387089	0.378819	0.39351	0.390221	0.382319	0.384058	0.383447	0.385106	0.36958	0.39207	0.385385	0.376979	0.390826	0.389574	0.3621	0.388465	0.379727
foretinib	0.349499	0.339759	0.372683	0.341734	0.335017	0.341978	0.343196	0.338079	0.342957	0.351311	0.332017	0.33821	0.359428	0.348253	0.352206	0.354087	0.330874	0.34286	0.343144	0.344646	0.332373	0.346428	0.337497	0.355121	0.329323	0.343116	0.350529	0.321054	0.358336	0.352848	0.32721	0.343242	0.354085	0.319942	0.359591	0.364263	0.33954	0.343774	0.358156	0.360501	0.319695	0.358956	0.329003	0.325259	0.35593	0.337788	0.311652	0.336022	0.343479
regorafenib	0.448841	0.446655	0.459083	0.454721	0.452343	0.443461	0.452587	0.454535	0.448196	0.449361	0.454103	0.449352	0.460024	0.456988	0.454344	0.447612	0.457328	0.440861	0.456263	0.449855	0.45005	0.451502	0.452359	0.458757	0.445942	0.43823	0.457457	0.438055	0.452807	0.451932	0.449256	0.449982	0.456508	0.432504	0.457021	0.456617	0.450316	0.448234	0.460698	0.455126	0.449339	0.455987	0.446783	0.444457	0.452762	0.451868	0.440297	0.442678	0.444158
WZ8040	0.376976	0.381567	0.381167	0.371289	0.380402	0.387278	0.372398	0.377212	0.377595	0.377788	0.382728	0.37574	0.368665	0.374923	0.374475	0.38962	0.372421	0.374404	0.372843	0.376396	0.375387	0.377212	0.370001	0.378873	0.380476	0.383853	0.37827	0.355655	0.387694	0.381613	0.372234	0.379777	0.372691	0.380891	0.380741	0.386897	0.377446	0.381367	0.374125	0.37854	0.372801	0.372847	0.375273	0.37684	0.378214	0.376719	0.378317	0.37464	0.38254
MGCD-265	0.449915	0.449561	0.45671	0.452852	0.452218	0.450966	0.451484	0.451392	0.453367	0.452154	0.451073	0.449145	0.453786	0.452294	0.452123	0.453495	0.449184	0.446755	0.454578	0.452039	0.450743	0.452615	0.449829	0.455731	0.448414	0.448035	0.452741	0.445324	0.451673	0.454494	0.444303	0.453067	0.455228	0.443878	0.455833	0.453152	0.450944	0.452698	0.45196	0.453539	0.444993	0.45514	0.450698	0.449551	0.453634	0.450228	0.436074	0.448754	0.448578
lenvatinib	0.464825	0.463426	0.48434	0.471727	0.463598	0.454609	0.48156	0.459461	0.462939	0.44914	0.475077	0.466131	0.485007	0.480392	0.480377	0.48472	0.475225	0.462267	0.465873	0.467181	0.458892	0.466494	0.47307	0.482034	0.473332	0.459273	0.466873	0.45553	0.466157	0.48646	0.450748	0.46892	0.489326	0.434769	0.474836	0.480668	0.469802	0.479114	0.489729	0.48503	0.451552	0.483462	0.454133	0.453986	0.462622	0.469707	0.451857	0.450583	0.463265
YK 4-279	0.418034	0.432594	0.43416	0.427291	0.438631	0.431518	0.417573	0.428225	0.43948	0.432449	0.433893	0.44138	0.42832	0.43685	0.429566	0.437522	0.44021	0.430224	0.426793	0.434549	0.437024	0.435637	0.425887	0.439798	0.426094	0.428013	0.438551	0.403152	0.439876	0.433832	0.430508	0.432732	0.435275	0.407793	0.423824	0.433096	0.436916	0.426703	0.445697	0.435992	0.421407	0.438224	0.433765	0.42158	0.425371	0.43682	0.423058	0.415557	0.430087
CAY10618	0.314764	0.348649	0.356338	0.351828	0.34956	0.35069	0.339197	0.359527	0.348443	0.349154	0.342369	0.355973	0.305345	0.39455	0.336562	0.335155	0.373421	0.362338	0.331999	0.355953	0.340859	0.349074	0.342915	0.370551	0.336162	0.326557	0.374169	0.255389	0.337728	0.347786	0.334324	0.359797	0.351738	0.314263	0.31685	0.302783	0.35323	0.324886	0.313323	0.340382	0.337439	0.320528	0.358827	0.327662	0.32347	0.355844	0.331341	0.318736	0.330653
KU 0060648	0.394816	0.397845	0.402101	0.394781	0.399347	0.4013	0.39415	0.396021	0.399245	0.400335	0.391845	0.396095	0.397727	0.399068	0.39544	0.403176	0.393023	0.391923	0.396519	0.399475	0.39509	0.397323	0.389678	0.398177	0.390688	0.39885	0.397024	0.398283	0.395202	0.39868	0.391628	0.399533	0.397957	0.397725	0.39619	0.401838	0.396072	0.40119	0.400685	0.396529	0.388182	0.39681	0.397643	0.399974	0.401106	0.396462	0.381244	0.397056	0.393622
narciclasine	0.254451	0.2848	0.286841	0.275842	0.285551	0.293559	0.278355	0.263398	0.289359	0.29346	0.273351	0.283699	0.239803	0.297463	0.269346	0.27549	0.288858	0.284346	0.245094	0.28024	0.28426	0.261347	0.241735	0.298871	0.257407	0.26576	0.300058	0.209824	0.304434	0.278589	0.292609	0.283974	0.266389	0.261314	0.260637	0.270371	0.273542	0.266374	0.267731	0.286068	0.249564	0.284837	0.276903	0.252438	0.260646	0.272526	0.25366	0.263443	0.288368
MLN2238	0.295613	0.337324	0.318854	0.300981	0.328804	0.324585	0.295246	0.314504	0.320384	0.339928	0.305796	0.329499	0.309985	0.331794	0.310535	0.294223	0.318651	0.322136	0.308598	0.316718	0.316474	0.323431	0.285903	0.320546	0.286873	0.317031	0.317721	0.306805	0.320167	0.305884	0.306435	0.299289	0.314274	0.321366	0.294489	0.310024	0.322065	0.307557	0.323485	0.304529	0.30147	0.306496	0.326634	0.318499	0.320338	0.319607	0.258301	0.305109	0.316695
ISOX	0.394467	0.398615	0.412854	0.404224	0.414673	0.407978	0.410436	0.405313	0.406289	0.394939	0.408998	0.413547	0.398605	0.412835	0.400644	0.411867	0.404358	0.399673	0.394765	0.409133	0.400591	0.406353	0.384121	0.416901	0.405316	0.404392	0.411288	0.363091	0.409159	0.404613	0.40518	0.408854	0.398934	0.389903	0.405464	0.399065	0.403948	0.399935	0.399255	0.40879	0.393581	0.404736	0.39659	0.393811	0.401197	0.398319	0.396101	0.389016	0.412248
itraconazole	0.476758	0.47732	0.479185	0.478092	0.479423	0.478647	0.477938	0.477841	0.478147	0.478104	0.47777	0.477994	0.476723	0.477768	0.477281	0.47663	0.477836	0.47835	0.477233	0.477783	0.47764	0.477059	0.476665	0.47903	0.476277	0.477187	0.479102	0.477454	0.478	0.478089	0.47726	0.478924	0.47841	0.47718	0.478709	0.477943	0.476966	0.478374	0.479673	0.477795	0.474587	0.478034	0.478602	0.476853	0.478349	0.477723	0.474575	0.478256	0.477384
lapatinib	0.424148	0.437412	0.434235	0.409082	0.428653	0.436666	0.393421	0.417439	0.426648	0.4378	0.416258	0.434045	0.425895	0.435525	0.430792	0.472727	0.387577	0.407539	0.424872	0.430559	0.43325	0.439795	0.389679	0.424367	0.416031	0.451487	0.426829	0.398896	0.433416	0.435124	0.394886	0.422139	0.429756	0.431211	0.437099	0.451487	0.430334	0.438476	0.434101	0.437227	0.430705	0.418427	0.405991	0.445341	0.440826	0.428776	0.385824	0.42113	0.415715
BRD-K29313308	0.478673	0.476933	0.481879	0.479797	0.482222	0.481693	0.481419	0.479866	0.479135	0.480638	0.478939	0.478951	0.477184	0.479721	0.477819	0.480763	0.480266	0.47792	0.479027	0.480177	0.479958	0.479192	0.478212	0.482896	0.478191	0.478781	0.481992	0.473899	0.482646	0.480278	0.479231	0.481107	0.480823	0.479072	0.481924	0.481638	0.478835	0.48068	0.480625	0.480125	0.476498	0.484433	0.481289	0.478889	0.481648	0.479861	0.476836	0.479079	0.478361
UNC0321	0.498851	0.498353	0.497411	0.497552	0.497959	0.495509	0.49602	0.498086	0.497396	0.496315	0.498174	0.498909	0.501959	0.499095	0.497524	0.505793	0.494721	0.494197	0.499871	0.498429	0.496296	0.498997	0.501393	0.497584	0.498063	0.49565	0.49945	0.503773	0.496554	0.499065	0.495709	0.49551	0.501451	0.492932	0.498493	0.502044	0.495972	0.498544	0.502972	0.498215	0.499027	0.49905	0.492909	0.500533	0.499568	0.495723	0.499612	0.494828	0.494158
erastin	0.427126	0.418206	0.425622	0.429477	0.428624	0.392788	0.406092	0.401653	0.407676	0.411589	0.423177	0.410984	0.446359	0.436152	0.417316	0.435433	0.42657	0.387935	0.433132	0.41977	0.407854	0.432195	0.425154	0.432944	0.422459	0.421584	0.424578	0.364098	0.423743	0.425349	0.394106	0.403747	0.413307	0.397555	0.414567	0.400908	0.425473	0.398376	0.449012	0.443165	0.449995	0.450374	0.396438	0.396558	0.428371	0.411377	0.435831	0.393351	0.416454
SGX-523	0.485231	0.48455	0.485833	0.481706	0.482159	0.484254	0.477679	0.483678	0.482451	0.485671	0.483094	0.4812	0.489746	0.478483	0.484396	0.484199	0.476212	0.478799	0.486759	0.485029	0.481675	0.484878	0.486893	0.481576	0.480883	0.483149	0.479397	0.489915	0.484348	0.486647	0.476673	0.482286	0.486581	0.479578	0.487712	0.488028	0.483109	0.482869	0.485196	0.482002	0.483363	0.482083	0.480953	0.484472	0.488286	0.479547	0.477231	0.481024	0.48153
erismodegib	0.48761	0.48505	0.487338	0.487727	0.493193	0.493811	0.492718	0.493913	0.48895	0.491571	0.491512	0.491588	0.483352	0.488447	0.493361	0.480193	0.490198	0.488677	0.484188	0.486617	0.490381	0.484309	0.48833	0.487468	0.486014	0.483175	0.49194	0.482409	0.485836	0.488839	0.496704	0.491938	0.481477	0.490056	0.488629	0.487483	0.481108	0.490448	0.472559	0.4828	0.482637	0.482327	0.492911	0.485766	0.481703	0.490239	0.485934	0.49423	0.48806
alisertib	0.390664	0.40703	0.42904	0.411808	0.406396	0.40385	0.38291	0.391151	0.410751	0.399018	0.411883	0.417906	0.420069	0.424798	0.40363	0.432798	0.412341	0.382863	0.399732	0.390952	0.389996	0.400029	0.386986	0.429072	0.406705	0.40007	0.411902	0.358304	0.40636	0.417596	0.394562	0.398983	0.423482	0.357678	0.428899	0.436726	0.401615	0.397205	0.42393	0.422414	0.379294	0.417162	0.378692	0.379985	0.409698	0.406863	0.378964	0.359657	0.395631
AZD6482	0.42629	0.42634	0.43359	0.426099	0.423277	0.417748	0.415541	0.424847	0.424234	0.413433	0.42792	0.433629	0.443651	0.419434	0.433152	0.443767	0.431162	0.419044	0.422426	0.433949	0.416876	0.426337	0.432637	0.421795	0.425697	0.421869	0.421672	0.43177	0.432214	0.421006	0.43365	0.421997	0.431886	0.414183	0.435287	0.42748	0.423344	0.42352	0.441723	0.429697	0.433484	0.419339	0.418496	0.427065	0.42369	0.416092	0.447623	0.412308	0.429584
ruxolitinib	0.478402	0.482998	0.479406	0.48338	0.480576	0.48079	0.480512	0.478295	0.483852	0.479568	0.482515	0.480967	0.484748	0.486317	0.479631	0.47463	0.483862	0.482565	0.477846	0.482533	0.483377	0.477874	0.476782	0.479594	0.479396	0.481076	0.480714	0.479827	0.481309	0.48221	0.486368	0.480578	0.482342	0.473577	0.480566	0.476392	0.482979	0.47994	0.480396	0.481973	0.478383	0.478831	0.478275	0.477096	0.477343	0.475146	0.476659	0.475649	0.482986
bleomycin A2	0.396776	0.427384	0.409468	0.397135	0.398819	0.392167	0.379851	0.380851	0.403997	0.409296	0.397052	0.428525	0.418813	0.413803	0.382439	0.432204	0.40523	0.393578	0.388441	0.403891	0.39544	0.391433	0.40671	0.415693	0.404654	0.384849	0.394609	0.384742	0.419321	0.390066	0.413586	0.394766	0.408162	0.363316	0.408711	0.402452	0.404965	0.374815	0.421698	0.397955	0.426086	0.408866	0.372263	0.394875	0.389142	0.401653	0.409564	0.361362	0.410164
GDC-0941	0.375336	0.373418	0.39664	0.389006	0.376378	0.370724	0.351958	0.373953	0.382704	0.373593	0.374424	0.387628	0.403421	0.392777	0.382756	0.397153	0.368386	0.358761	0.369904	0.387983	0.364193	0.379413	0.383119	0.391808	0.382729	0.368028	0.384874	0.356838	0.381792	0.373386	0.359666	0.378871	0.393214	0.350927	0.390936	0.39119	0.371244	0.368878	0.393905	0.388925	0.380045	0.374612	0.365929	0.375822	0.38318	0.367573	0.396922	0.34893	0.37735
SB-525334	0.459494	0.451213	0.467041	0.458891	0.463431	0.46251	0.465124	0.454233	0.457804	0.457018	0.462644	0.457398	0.459794	0.459302	0.452282	0.458905	0.457894	0.458242	0.453242	0.460786	0.460301	0.458104	0.46007	0.470399	0.456955	0.449628	0.460573	0.449032	0.45587	0.457899	0.447849	0.460488	0.461408	0.450831	0.465146	0.4641	0.458877	0.459246	0.454183	0.456514	0.444601	0.457941	0.458516	0.456541	0.461051	0.45748	0.436974	0.461003	0.454171
PHA-793887	0.380632	0.40521	0.407322	0.401136	0.40775	0.404552	0.409756	0.388757	0.409755	0.400964	0.402096	0.416264	0.375143	0.423154	0.403915	0.389066	0.421686	0.416444	0.368862	0.411459	0.402335	0.397399	0.389981	0.416335	0.389643	0.385925	0.412803	0.362091	0.407743	0.399828	0.416445	0.411547	0.400018	0.38109	0.395188	0.389125	0.410523	0.400933	0.394562	0.412478	0.380036	0.385751	0.398497	0.386214	0.389282	0.417626	0.381293	0.388495	0.402314
quizartinib	0.480457	0.479906	0.487467	0.480865	0.479475	0.470692	0.473539	0.478565	0.477043	0.474774	0.479731	0.479723	0.490953	0.4825	0.482634	0.483876	0.482033	0.475382	0.480801	0.479876	0.47691	0.481885	0.487603	0.490325	0.477246	0.473102	0.478798	0.481006	0.483831	0.48691	0.47799	0.477733	0.48965	0.465718	0.483159	0.483032	0.475365	0.479227	0.490646	0.48765	0.475585	0.486104	0.475565	0.471339	0.47838	0.480701	0.480412	0.472398	0.4791
fingolimod	0.415071	0.41155	0.414256	0.413127	0.418079	0.410091	0.413792	0.410298	0.413624	0.408079	0.41192	0.415236	0.418617	0.416563	0.415338	0.419504	0.412478	0.401889	0.416006	0.412783	0.409375	0.418793	0.41361	0.417949	0.40868	0.410973	0.411995	0.402079	0.413673	0.414208	0.402627	0.411719	0.418176	0.39736	0.417634	0.415003	0.41034	0.40919	0.424203	0.416386	0.409804	0.414101	0.406412	0.413344	0.419771	0.409989	0.407609	0.403141	0.407757
pazopanib	0.440939	0.442083	0.453185	0.448608	0.44778	0.443778	0.45564	0.442766	0.447863	0.443076	0.453643	0.445726	0.449668	0.455683	0.458401	0.437574	0.456101	0.453493	0.438243	0.446412	0.446782	0.441845	0.448832	0.452272	0.439918	0.440933	0.448952	0.4393	0.444104	0.447725	0.456277	0.44764	0.453198	0.432388	0.445625	0.445331	0.445132	0.448831	0.458646	0.451202	0.431383	0.451169	0.445004	0.434834	0.441395	0.441651	0.438011	0.440535	0.445862
BRD-K24690302	0.484973	0.477011	0.48325	0.483843	0.485238	0.480681	0.489504	0.484353	0.48082	0.480752	0.48198	0.483896	0.481652	0.485439	0.483944	0.487837	0.488411	0.480112	0.487759	0.481371	0.484131	0.482867	0.48213	0.486108	0.47545	0.478089	0.488825	0.46975	0.490129	0.479347	0.481377	0.485715	0.481088	0.479704	0.483163	0.489986	0.478873	0.482281	0.49504	0.486514	0.478547	0.497979	0.48692	0.481771	0.482104	0.483318	0.488855	0.481953	0.47818
BRD-K70511574	0.368178	0.383907	0.397292	0.388899	0.387387	0.390228	0.371749	0.382737	0.389675	0.392811	0.374994	0.401779	0.363997	0.395757	0.385653	0.391546	0.390241	0.380528	0.369579	0.38309	0.38324	0.371806	0.372613	0.401163	0.364408	0.375975	0.403016	0.349025	0.388133	0.389534	0.386891	0.390127	0.389421	0.369025	0.382315	0.381159	0.384572	0.388126	0.40047	0.397769	0.372874	0.392264	0.385056	0.371645	0.377484	0.394144	0.356083	0.369294	0.373203
vemurafenib	0.482955	0.47809	0.483505	0.489312	0.473036	0.463179	0.475323	0.476342	0.479663	0.479044	0.488325	0.49344	0.493312	0.487875	0.486747	0.490578	0.484675	0.470859	0.483546	0.476444	0.481321	0.480956	0.49552	0.491727	0.494986	0.476633	0.477021	0.474573	0.482946	0.475944	0.491199	0.47808	0.496031	0.466617	0.486692	0.481419	0.477884	0.474	0.505987	0.495302	0.502699	0.48587	0.468551	0.470622	0.478338	0.485693	0.50858	0.465133	0.482899
GSK461364	0.230999	0.290812	0.272186	0.26555	0.268688	0.273222	0.252902	0.252748	0.273464	0.286468	0.27899	0.305179	0.240478	0.306945	0.289289	0.273339	0.287921	0.263416	0.248697	0.262657	0.265034	0.250542	0.200794	0.301779	0.232883	0.256855	0.322174	0.185203	0.252629	0.283876	0.24947	0.279163	0.2761	0.218565	0.244107	0.25599	0.272376	0.25569	0.299914	0.300134	0.21436	0.292717	0.256547	0.226812	0.253428	0.28045	0.193208	0.231126	0.2434
BRD-K28456706	0.475887	0.471772	0.485495	0.477298	0.477983	0.479164	0.476734	0.474213	0.479113	0.476353	0.48016	0.475666	0.473516	0.478216	0.47758	0.486276	0.476915	0.469642	0.474874	0.47655	0.478775	0.475305	0.473952	0.488328	0.473437	0.471395	0.481656	0.460133	0.48341	0.480831	0.476079	0.485158	0.482418	0.468354	0.486337	0.483858	0.476629	0.479597	0.482208	0.482121	0.469845	0.485446	0.475347	0.471843	0.477082	0.478298	0.476769	0.473011	0.475203
STF-31	0.36573	0.389973	0.391043	0.400153	0.391951	0.377643	0.388553	0.391395	0.394329	0.383931	0.385339	0.403302	0.354586	0.434059	0.378432	0.378436	0.414471	0.40834	0.371913	0.393464	0.379274	0.393145	0.391001	0.428017	0.378934	0.372882	0.409215	0.309831	0.376707	0.389522	0.38256	0.397408	0.392263	0.361355	0.361194	0.343823	0.391191	0.36841	0.372237	0.390181	0.384056	0.379097	0.395426	0.360376	0.36183	0.395059	0.374841	0.363623	0.370263
spautin-1	0.443263	0.439584	0.450485	0.451773	0.45885	0.456333	0.447837	0.454328	0.457437	0.453897	0.46095	0.447205	0.452383	0.454506	0.457279	0.434789	0.455842	0.440349	0.446922	0.449538	0.461844	0.457317	0.431349	0.455698	0.443178	0.445431	0.451804	0.423125	0.444422	0.449786	0.429198	0.447922	0.443117	0.441774	0.449488	0.447832	0.450056	0.450285	0.447023	0.447576	0.439262	0.450137	0.469154	0.447909	0.448519	0.449393	0.431998	0.441689	0.443238
BRD-A02303741	0.50366	0.500779	0.502512	0.503496	0.501731	0.500729	0.504024	0.504023	0.500663	0.503481	0.501944	0.504717	0.505686	0.505695	0.50207	0.50558	0.509271	0.499539	0.50359	0.50141	0.502827	0.505035	0.506058	0.50594	0.505215	0.499337	0.505188	0.497177	0.504846	0.502274	0.499764	0.502036	0.506827	0.496341	0.503736	0.503431	0.503033	0.500397	0.500438	0.504039	0.507176	0.505839	0.503099	0.500996	0.50276	0.503834	0.509485	0.499649	0.500566
ML320	0.488766	0.491304	0.485608	0.487546	0.499202	0.493133	0.500826	0.475888	0.482756	0.48841	0.490516	0.485622	0.475345	0.488522	0.474274	0.485038	0.485062	0.490613	0.481244	0.489919	0.486281	0.480504	0.475921	0.488997	0.485944	0.494177	0.496213	0.462531	0.498707	0.490426	0.487738	0.489486	0.480663	0.48937	0.485525	0.494406	0.484019	0.48433	0.490233	0.478203	0.490444	0.505125	0.481925	0.477814	0.488743	0.484916	0.498534	0.483344	0.490462
PF-543	0.467687	0.470587	0.469227	0.468432	0.469981	0.47188	0.468681	0.468861	0.469589	0.471857	0.468034	0.46845	0.469869	0.469704	0.467573	0.470437	0.466273	0.466189	0.470091	0.469362	0.468703	0.470027	0.464737	0.469221	0.466914	0.469475	0.469471	0.466127	0.468327	0.469619	0.466856	0.468215	0.469536	0.469511	0.467889	0.47022	0.469283	0.46968	0.46997	0.468464	0.467276	0.470429	0.46905	0.47104	0.47169	0.468696	0.459593	0.467234	0.469614
PF-573228	0.427983	0.430339	0.437723	0.434084	0.432489	0.435548	0.437631	0.43538	0.435919	0.433142	0.432004	0.436136	0.434149	0.436908	0.431131	0.434127	0.438592	0.42937	0.427256	0.431894	0.432162	0.426757	0.431825	0.436348	0.427059	0.421636	0.43628	0.428333	0.430816	0.433789	0.4406	0.436101	0.434494	0.41724	0.433992	0.436615	0.428191	0.433554	0.435621	0.43477	0.423829	0.430561	0.430434	0.425057	0.429287	0.433861	0.424652	0.430181	0.429786
ceranib-2	0.368883	0.387213	0.394917	0.378122	0.390218	0.388365	0.385655	0.374751	0.384124	0.377935	0.388432	0.395935	0.371818	0.406236	0.382517	0.397403	0.400583	0.378854	0.363514	0.380246	0.371832	0.37893	0.360451	0.400937	0.377814	0.371196	0.398366	0.34679	0.387057	0.397163	0.369241	0.388911	0.397746	0.349997	0.387183	0.394696	0.385227	0.395057	0.391668	0.398914	0.353751	0.393558	0.37557	0.366053	0.374718	0.399129	0.355147	0.356892	0.371303
GSK4112	0.494028	0.495992	0.497619	0.49529	0.496076	0.49917	0.49421	0.495795	0.49831	0.498277	0.491948	0.494688	0.494831	0.493713	0.493887	0.49556	0.491191	0.495888	0.496468	0.496816	0.496505	0.495016	0.490478	0.496764	0.493771	0.498312	0.494358	0.497901	0.495379	0.496936	0.494986	0.496981	0.49565	0.499223	0.495223	0.498475	0.495419	0.49835	0.496718	0.495596	0.490395	0.49718	0.495448	0.498087	0.498374	0.495336	0.483091	0.499518	0.496409
etomoxir	0.481986	0.482189	0.4819	0.482117	0.482415	0.483098	0.483624	0.481599	0.48073	0.48268	0.481637	0.481092	0.479697	0.481311	0.480097	0.481471	0.484193	0.483011	0.479009	0.481738	0.480862	0.482185	0.483697	0.482591	0.482688	0.480818	0.481105	0.482553	0.483186	0.482209	0.486749	0.483102	0.481806	0.481734	0.482383	0.4846	0.479908	0.481823	0.481649	0.480449	0.479425	0.480098	0.482482	0.480616	0.482435	0.481107	0.485017	0.482354	0.481773
HC-067047	0.467593	0.46895	0.469048	0.468671	0.468706	0.469409	0.467673	0.467838	0.46921	0.469219	0.468461	0.467817	0.46785	0.468478	0.468776	0.46921	0.466078	0.467248	0.469001	0.468853	0.46906	0.468882	0.465442	0.468512	0.467881	0.469859	0.468427	0.466462	0.468362	0.469245	0.466918	0.468926	0.468168	0.469127	0.468536	0.469475	0.469341	0.469167	0.469147	0.469135	0.466802	0.470043	0.467903	0.469308	0.469622	0.467413	0.463801	0.46845	0.469045
IPR-456	0.478369	0.477791	0.477622	0.478402	0.477506	0.476242	0.476303	0.477624	0.47726	0.476999	0.478921	0.478156	0.478629	0.477513	0.478347	0.476753	0.477833	0.476962	0.478728	0.477503	0.477367	0.477999	0.480206	0.477641	0.477648	0.476769	0.477775	0.478425	0.478398	0.47827	0.477683	0.476716	0.478574	0.476117	0.478768	0.477922	0.477538	0.477084	0.479162	0.477964	0.478709	0.478041	0.476822	0.477055	0.477922	0.477424	0.480393	0.476439	0.477578
leptomycin B	0.123576	0.132831	0.134152	0.132379	0.138182	0.13764	0.131619	0.133988	0.135715	0.136248	0.134892	0.133479	0.12366	0.139027	0.132047	0.12938	0.134599	0.132186	0.12906	0.133356	0.136078	0.133065	0.119518	0.140724	0.13065	0.130654	0.139565	0.114303	0.131526	0.134257	0.131395	0.136165	0.13126	0.129291	0.130927	0.127856	0.137162	0.132202	0.126837	0.136267	0.124444	0.130597	0.138413	0.129151	0.131284	0.135379	0.115716	0.128164	0.132822
AZ-3146	0.470046	0.471665	0.475633	0.473101	0.47476	0.475785	0.47252	0.473599	0.473969	0.475656	0.47114	0.471485	0.469428	0.474216	0.470937	0.47286	0.471166	0.470635	0.472329	0.472808	0.473089	0.472686	0.467039	0.476981	0.471389	0.472121	0.476951	0.46664	0.472198	0.474044	0.470834	0.475137	0.472974	0.471757	0.473197	0.473497	0.472296	0.47385	0.472467	0.473676	0.467866	0.474638	0.47445	0.472408	0.474504	0.474378	0.461221	0.473289	0.470756
VU0155056	0.483372	0.48522	0.483863	0.484028	0.485106	0.48529	0.48267	0.483984	0.485007	0.485188	0.484492	0.48333	0.483438	0.484981	0.484706	0.482243	0.482696	0.483223	0.484852	0.484585	0.484803	0.484549	0.481823	0.483926	0.482933	0.484968	0.484194	0.482774	0.484617	0.484715	0.481696	0.483767	0.48405	0.485188	0.483805	0.483942	0.484416	0.484324	0.483939	0.483558	0.482899	0.48384	0.484853	0.484955	0.485371	0.483669	0.47877	0.483487	0.484611
BRD-K97651142	0.354797	0.344094	0.375647	0.381438	0.375707	0.369603	0.34127	0.383041	0.387074	0.383941	0.382239	0.370315	0.37983	0.374403	0.373309	0.336104	0.368355	0.3435	0.366396	0.37975	0.387201	0.379165	0.354077	0.396876	0.361875	0.345029	0.390739	0.328842	0.350351	0.374315	0.334495	0.384126	0.376886	0.344903	0.37322	0.35203	0.366564	0.374959	0.37155	0.369459	0.352266	0.366623	0.40875	0.358529	0.369834	0.38529	0.314148	0.349785	0.337432
vorapaxar	0.472531	0.472156	0.473935	0.472914	0.472851	0.472728	0.471601	0.471917	0.472094	0.473495	0.470761	0.471761	0.474425	0.471729	0.47174	0.472907	0.472082	0.47025	0.473149	0.472242	0.471116	0.471961	0.471791	0.473307	0.47075	0.471168	0.473045	0.474254	0.472656	0.473185	0.471441	0.472643	0.474834	0.469842	0.473643	0.474796	0.471215	0.472936	0.477246	0.471827	0.469685	0.474772	0.470688	0.471883	0.47352	0.470782	0.470806	0.471632	0.47063
Ch-55	0.442899	0.44487	0.444242	0.4385	0.438763	0.433908	0.418146	0.443456	0.436567	0.434763	0.440917	0.445803	0.454164	0.451128	0.441636	0.452774	0.4479	0.427501	0.438641	0.439388	0.43171	0.448136	0.448446	0.455316	0.43549	0.435761	0.447288	0.423345	0.459541	0.45081	0.437022	0.435167	0.449458	0.40211	0.452358	0.451073	0.436825	0.438229	0.463467	0.451576	0.437528	0.448881	0.436384	0.427966	0.442065	0.437158	0.474352	0.418599	0.436624
BRD-A71883111	0.482238	0.479627	0.489026	0.487305	0.491461	0.486222	0.481727	0.486035	0.484192	0.481863	0.48845	0.482692	0.484773	0.485388	0.482187	0.488583	0.483408	0.476476	0.485042	0.483497	0.484977	0.487165	0.483896	0.492682	0.4863	0.485123	0.489925	0.475429	0.487393	0.487206	0.48021	0.489688	0.489606	0.477963	0.490331	0.48886	0.483698	0.486649	0.491743	0.48885	0.482124	0.493923	0.486649	0.481154	0.49059	0.488086	0.481988	0.482779	0.482227
necrostatin-7	0.480005	0.480519	0.484104	0.480489	0.484337	0.487581	0.485569	0.482631	0.48202	0.483198	0.48445	0.481073	0.478651	0.483378	0.481065	0.482715	0.483377	0.480919	0.480208	0.481605	0.48304	0.479614	0.476376	0.484501	0.482885	0.48095	0.484459	0.475105	0.481748	0.482654	0.48098	0.484389	0.480187	0.483568	0.483062	0.484164	0.481176	0.48389	0.480562	0.481902	0.478129	0.483683	0.484405	0.480062	0.481062	0.482378	0.477117	0.484358	0.481902
PYR-41	0.487227	0.48782	0.487353	0.4885	0.489314	0.487756	0.490551	0.487964	0.486927	0.487726	0.488466	0.488967	0.488172	0.487525	0.487493	0.489247	0.490093	0.489685	0.488122	0.487976	0.48702	0.488367	0.491779	0.490484	0.489586	0.486813	0.487786	0.489538	0.488678	0.487928	0.489908	0.488797	0.489559	0.486038	0.487738	0.489667	0.487045	0.487522	0.4894	0.488463	0.486074	0.489431	0.485955	0.486207	0.486736	0.487117	0.491622	0.488102	0.489014
I-BET151	0.399634	0.402939	0.409264	0.402609	0.411695	0.410726	0.409887	0.398297	0.403732	0.411239	0.392259	0.400709	0.389787	0.407059	0.398801	0.406839	0.400307	0.39929	0.403273	0.406547	0.40221	0.405383	0.38949	0.413878	0.390436	0.402388	0.409552	0.383371	0.411399	0.402605	0.398329	0.4079	0.399393	0.39748	0.40829	0.40811	0.402818	0.407059	0.408071	0.405689	0.38655	0.414453	0.402964	0.399753	0.410141	0.406518	0.370089	0.39969	0.398871
lomeguatrib	0.4731	0.473366	0.475322	0.475189	0.47654	0.477526	0.47504	0.47349	0.475856	0.476207	0.478095	0.473036	0.471043	0.476049	0.475573	0.473489	0.47478	0.476803	0.473417	0.474975	0.476666	0.474683	0.471046	0.475138	0.474418	0.476973	0.476138	0.469885	0.474622	0.475958	0.473035	0.477063	0.472679	0.475268	0.475566	0.474294	0.475451	0.476161	0.473805	0.475979	0.468315	0.475089	0.475655	0.472837	0.473669	0.473842	0.471957	0.477562	0.475855
PF-184	0.430371	0.436721	0.441497	0.438081	0.439418	0.429463	0.433258	0.433457	0.439749	0.432989	0.433263	0.438348	0.438633	0.438877	0.434985	0.437611	0.440096	0.431098	0.439179	0.437907	0.434765	0.436253	0.435929	0.443011	0.433725	0.426477	0.438709	0.43059	0.438678	0.435606	0.434836	0.437058	0.445863	0.420212	0.436724	0.436884	0.439623	0.429451	0.447016	0.440127	0.437151	0.441883	0.429303	0.432297	0.435815	0.434548	0.433556	0.425076	0.435139
JW-480	0.488779	0.489665	0.490613	0.490443	0.491036	0.489795	0.485779	0.489055	0.490458	0.490918	0.490328	0.492212	0.491798	0.486063	0.489491	0.48888	0.487168	0.486755	0.493342	0.491018	0.489356	0.491809	0.488952	0.489751	0.491644	0.491121	0.48893	0.49092	0.489516	0.490417	0.487539	0.489304	0.490816	0.489229	0.491557	0.490656	0.488824	0.489981	0.49855	0.489762	0.490342	0.490874	0.4877	0.491982	0.491642	0.488386	0.489072	0.490889	0.493128
BMS-195614	0.484981	0.486473	0.487836	0.489294	0.488389	0.487439	0.488718	0.486944	0.4876	0.489368	0.486731	0.486794	0.487344	0.487793	0.486232	0.485467	0.487574	0.483489	0.487747	0.486543	0.485963	0.486484	0.48479	0.489633	0.485243	0.48331	0.489217	0.485216	0.486495	0.486123	0.484147	0.487248	0.488987	0.48263	0.488769	0.485606	0.485794	0.487001	0.487339	0.486583	0.484012	0.488939	0.485854	0.486132	0.487292	0.485536	0.481791	0.484359	0.484585
BRD-K35604418	0.417871	0.417215	0.429211	0.425569	0.425637	0.421124	0.426002	0.420698	0.419933	0.419628	0.427332	0.422637	0.410156	0.428995	0.42679	0.417682	0.426364	0.41758	0.410943	0.415617	0.420998	0.419134	0.421068	0.43385	0.423817	0.415194	0.423467	0.394691	0.416689	0.426366	0.412694	0.428068	0.42924	0.403841	0.42668	0.425979	0.419336	0.427368	0.41983	0.424776	0.405752	0.424633	0.419512	0.410887	0.413807	0.419994	0.421316	0.407942	0.416335
SB-743921	0.163143	0.249421	0.219506	0.169688	0.241668	0.219371	0.158841	0.208467	0.229229	0.2183	0.162312	0.270788	0.188587	0.248102	0.19343	0.24524	0.224991	0.19446	0.202494	0.211369	0.20248	0.22368	0.120253	0.244339	0.142005	0.221585	0.212858	0.142627	0.237995	0.252576	0.1829	0.200773	0.208382	0.168357	0.165092	0.225561	0.243002	0.242167	0.238238	0.214567	0.145667	0.226224	0.212761	0.203588	0.248715	0.240453	0.114719	0.151904	0.194347
GSK525762A	0.446366	0.446864	0.449728	0.448224	0.449667	0.449488	0.449298	0.448248	0.448406	0.449722	0.446193	0.447465	0.445679	0.44914	0.446035	0.448821	0.447669	0.446706	0.447537	0.448287	0.447713	0.448237	0.445062	0.451237	0.446258	0.446726	0.450335	0.444974	0.447085	0.448153	0.44714	0.449731	0.44864	0.446088	0.448908	0.448931	0.447717	0.448484	0.448149	0.448503	0.444408	0.449859	0.448467	0.447219	0.449554	0.449376	0.439632	0.447944	0.445838
SMER-3	0.353379	0.355131	0.364193	0.370525	0.356613	0.328145	0.380943	0.358555	0.349231	0.331096	0.340068	0.376762	0.365978	0.353495	0.349584	0.361935	0.386127	0.383498	0.350184	0.368206	0.329993	0.357919	0.382081	0.387022	0.369988	0.330018	0.364605	0.346727	0.371505	0.34526	0.389189	0.347463	0.367215	0.321431	0.361216	0.358159	0.362763	0.336291	0.370811	0.375778	0.383428	0.357448	0.347671	0.339099	0.343782	0.336029	0.411504	0.338364	0.36708
NVP-ADW742	0.413577	0.408212	0.422235	0.414323	0.424009	0.417265	0.431931	0.412427	0.411036	0.412303	0.413411	0.41027	0.420871	0.420098	0.402938	0.42799	0.42647	0.405873	0.413736	0.407333	0.410897	0.423612	0.41319	0.424474	0.416964	0.408743	0.41613	0.407174	0.412704	0.41898	0.419626	0.418573	0.422394	0.397205	0.421821	0.428673	0.410077	0.416317	0.416647	0.421127	0.405625	0.432787	0.409893	0.406789	0.423226	0.413265	0.416245	0.409606	0.410534
clofarabine	0.335827	0.378507	0.406544	0.380999	0.366939	0.355228	0.334294	0.344966	0.409398	0.369736	0.352421	0.385554	0.357624	0.391145	0.357861	0.364147	0.370091	0.37139	0.372439	0.378153	0.402263	0.362064	0.334281	0.454823	0.344991	0.346526	0.419596	0.306703	0.425969	0.347158	0.348401	0.373615	0.408355	0.330083	0.363266	0.356195	0.380504	0.344232	0.442983	0.405642	0.393374	0.45337	0.364142	0.339234	0.373165	0.41016	0.299157	0.333305	0.382516
XL765	0.490751	0.490286	0.492248	0.490949	0.489841	0.488517	0.491172	0.490629	0.489115	0.488891	0.492775	0.490931	0.494919	0.4906	0.490824	0.493627	0.492443	0.489601	0.490657	0.486601	0.489854	0.488704	0.4958	0.49085	0.491296	0.487729	0.489763	0.489177	0.490612	0.490352	0.485626	0.489352	0.494462	0.484127	0.49201	0.490392	0.48654	0.489214	0.495138	0.490361	0.487141	0.492318	0.488251	0.486705	0.487163	0.486991	0.499099	0.486047	0.490399
ML258	0.492311	0.493999	0.494329	0.493385	0.493489	0.494624	0.493957	0.494803	0.49214	0.494283	0.491671	0.49253	0.494609	0.496315	0.493517	0.492169	0.496027	0.493875	0.489965	0.49318	0.491452	0.49333	0.494237	0.492168	0.493219	0.493302	0.48981	0.496323	0.492083	0.493181	0.500196	0.491302	0.495479	0.492843	0.49465	0.494649	0.493099	0.494093	0.492231	0.490481	0.48982	0.48814	0.491542	0.49376	0.495486	0.490674	0.496763	0.490514	0.493695
SR1001	0.496109	0.496774	0.498689	0.49872	0.49814	0.497308	0.498353	0.498788	0.497434	0.495801	0.499936	0.49883	0.499307	0.49738	0.498371	0.498941	0.498807	0.496232	0.49685	0.497054	0.496896	0.4976	0.496681	0.497338	0.497932	0.496424	0.497678	0.497401	0.495169	0.497093	0.494906	0.497941	0.498753	0.494223	0.498283	0.497227	0.497924	0.498063	0.498455	0.49764	0.49568	0.497684	0.49546	0.496336	0.496266	0.49497	0.495624	0.496236	0.495717
bardoxolone methyl	0.282692	0.301768	0.298128	0.292272	0.297689	0.307579	0.296751	0.292552	0.298588	0.298891	0.29215	0.305798	0.285168	0.301205	0.299219	0.287578	0.306444	0.290812	0.291139	0.293477	0.298402	0.287061	0.269046	0.296076	0.282918	0.29154	0.294893	0.277637	0.29078	0.293711	0.296807	0.296695	0.298315	0.287262	0.294266	0.296566	0.289551	0.295629	0.305521	0.287201	0.283846	0.290903	0.29306	0.299175	0.289083	0.291357	0.272271	0.287619	0.286178
elocalcitol	0.469106	0.466746	0.479337	0.475783	0.476763	0.475637	0.473781	0.477202	0.476533	0.474922	0.469654	0.472052	0.466815	0.47704	0.472163	0.471541	0.474493	0.472712	0.467369	0.472822	0.475838	0.474137	0.467563	0.484195	0.470958	0.470467	0.479898	0.455572	0.479119	0.474519	0.473731	0.479815	0.471786	0.47135	0.475766	0.475223	0.470746	0.47819	0.470053	0.476345	0.463939	0.474857	0.479872	0.469944	0.477008	0.478211	0.458479	0.474736	0.471154
BMS-270394	0.490726	0.487633	0.48961	0.486028	0.487201	0.484688	0.483224	0.491156	0.484658	0.482839	0.48792	0.48732	0.491355	0.492391	0.490532	0.492751	0.498219	0.486317	0.488656	0.486004	0.486867	0.491864	0.497095	0.4921	0.486191	0.484368	0.488674	0.479277	0.498959	0.493221	0.491168	0.489733	0.488053	0.474639	0.492208	0.494042	0.488656	0.484967	0.497451	0.491391	0.485788	0.493483	0.488743	0.483137	0.48902	0.489642	0.507927	0.484489	0.488903
fluvastatin	0.418241	0.426453	0.414315	0.422891	0.426681	0.415878	0.419816	0.430324	0.420165	0.415097	0.440746	0.436088	0.432868	0.420892	0.43457	0.414897	0.434562	0.430586	0.423113	0.416621	0.423985	0.422187	0.432245	0.412695	0.412186	0.417988	0.422962	0.442149	0.417015	0.419106	0.426448	0.415127	0.420739	0.414332	0.426053	0.412918	0.41628	0.42473	0.444488	0.41649	0.4161	0.418297	0.412332	0.418788	0.413295	0.416719	0.441292	0.423654	0.415655
AZD4547	0.42644	0.42321	0.418068	0.411335	0.407079	0.409002	0.429533	0.416798	0.413474	0.406542	0.408536	0.409341	0.450986	0.416145	0.419447	0.427479	0.423166	0.418337	0.419093	0.412992	0.405471	0.410127	0.434553	0.412702	0.402508	0.407049	0.401135	0.437815	0.411149	0.427473	0.432058	0.412293	0.427575	0.394706	0.403972	0.427085	0.413214	0.428155	0.439363	0.418043	0.397411	0.426223	0.401429	0.407503	0.415807	0.410944	0.387416	0.4113	0.416453
hyperforin	0.455605	0.456691	0.461267	0.460738	0.46068	0.462244	0.459048	0.461019	0.462621	0.461269	0.463896	0.458883	0.455547	0.461094	0.461559	0.456232	0.458963	0.456434	0.458161	0.458922	0.464555	0.457752	0.455279	0.462054	0.456869	0.458044	0.462904	0.451271	0.45818	0.461074	0.456174	0.463638	0.458761	0.458133	0.461661	0.459587	0.458001	0.461324	0.460008	0.460256	0.454172	0.461072	0.464708	0.459507	0.459075	0.458998	0.450626	0.461317	0.457578
NVP-231	0.412731	0.421774	0.424418	0.415684	0.425608	0.421464	0.405702	0.414884	0.428419	0.421208	0.412738	0.431224	0.424367	0.422357	0.417223	0.41467	0.419286	0.420378	0.418315	0.429173	0.425266	0.420447	0.40881	0.431921	0.412108	0.419219	0.429047	0.395888	0.424383	0.424358	0.412071	0.420136	0.423584	0.405087	0.420267	0.416412	0.424329	0.413997	0.426806	0.429705	0.417894	0.427809	0.424687	0.413491	0.424678	0.42627	0.391893	0.409048	0.423788
MK-0752	0.488397	0.487419	0.484976	0.483304	0.486968	0.48784	0.489837	0.487524	0.484571	0.481823	0.488515	0.486518	0.491058	0.48634	0.487021	0.486224	0.491565	0.494513	0.485116	0.48561	0.486306	0.486181	0.494644	0.483146	0.488708	0.487483	0.482568	0.490648	0.488251	0.486115	0.495658	0.486132	0.487781	0.48984	0.487213	0.488515	0.487209	0.487305	0.487519	0.487786	0.482786	0.485475	0.487354	0.483512	0.485576	0.482194	0.501715	0.487176	0.489802
semagacestat	0.481829	0.485089	0.476889	0.479084	0.484729	0.486609	0.485145	0.478106	0.477221	0.483164	0.480378	0.479902	0.476667	0.479345	0.479024	0.476636	0.484318	0.493761	0.472216	0.480085	0.478848	0.478505	0.4785	0.47826	0.483568	0.484114	0.483061	0.479561	0.483901	0.481276	0.490577	0.481597	0.475583	0.488054	0.476501	0.481112	0.481424	0.480959	0.479477	0.479139	0.471941	0.475928	0.480302	0.475622	0.476141	0.476574	0.497101	0.482843	0.485959
bosutinib	0.3774	0.386783	0.384895	0.379711	0.390789	0.391988	0.369343	0.380939	0.387584	0.387724	0.388868	0.38412	0.377258	0.386545	0.385777	0.382533	0.376594	0.381202	0.377506	0.382319	0.388121	0.38741	0.371694	0.385333	0.38418	0.390493	0.392376	0.356392	0.390563	0.387488	0.380676	0.38268	0.37493	0.384364	0.384155	0.385649	0.384324	0.380523	0.382282	0.383475	0.380623	0.369849	0.386731	0.38165	0.383791	0.384091	0.379274	0.382984	0.386276
nelarabine	0.503684	0.501672	0.504594	0.50527	0.506624	0.50578	0.509256	0.505585	0.504739	0.50615	0.504922	0.504301	0.501391	0.507	0.504921	0.504426	0.504389	0.504396	0.504915	0.503941	0.504407	0.505466	0.500658	0.507137	0.50328	0.50513	0.506636	0.502602	0.505646	0.504275	0.504777	0.505143	0.503746	0.505248	0.504879	0.506404	0.503263	0.506861	0.506318	0.50523	0.502362	0.509091	0.507523	0.504746	0.505842	0.506621	0.504767	0.506213	0.503241
rigosertib	0.303525	0.329761	0.333392	0.306036	0.325198	0.33744	0.300347	0.313634	0.329191	0.335624	0.31	0.351121	0.291752	0.339273	0.324698	0.351671	0.339697	0.316953	0.310243	0.32624	0.327385	0.304436	0.277094	0.34312	0.292148	0.304409	0.343236	0.255903	0.343442	0.324921	0.298103	0.326202	0.328456	0.290446	0.311531	0.322039	0.338568	0.326651	0.334014	0.34084	0.313001	0.376573	0.332581	0.29787	0.31001	0.325794	0.271503	0.28933	0.31257
AT7867	0.413482	0.421245	0.424173	0.42799	0.420972	0.414326	0.432573	0.420527	0.419699	0.409822	0.407627	0.433342	0.42006	0.426911	0.419655	0.426133	0.432665	0.428807	0.410783	0.420804	0.409596	0.417141	0.432725	0.432337	0.423559	0.408486	0.425767	0.402242	0.438275	0.416099	0.455105	0.426799	0.434494	0.395934	0.423051	0.423608	0.416047	0.410321	0.428839	0.427978	0.413382	0.420529	0.402365	0.401592	0.409284	0.41917	0.450175	0.403452	0.427315
PD318088	0.390752	0.428442	0.385646	0.388924	0.363641	0.393381	0.367946	0.380696	0.398807	0.428483	0.345817	0.374295	0.437673	0.414852	0.368533	0.378059	0.394641	0.372031	0.4056	0.369121	0.394012	0.40822	0.338184	0.380202	0.393135	0.399576	0.383604	0.458218	0.407453	0.40642	0.402581	0.36844	0.394581	0.393695	0.406912	0.433576	0.380234	0.411232	0.373955	0.405235	0.380103	0.400917	0.383145	0.402211	0.404661	0.426667	0.327778	0.386505	0.402293
KU-60019	0.452588	0.457256	0.459054	0.457147	0.461807	0.463113	0.460537	0.455894	0.45848	0.458738	0.453582	0.459086	0.451567	0.456884	0.456794	0.456186	0.454667	0.457301	0.450178	0.459233	0.455857	0.45401	0.449615	0.460937	0.452939	0.456855	0.459515	0.453102	0.452452	0.456415	0.457984	0.461582	0.456384	0.457112	0.456805	0.452594	0.453766	0.458793	0.459583	0.457487	0.444339	0.450175	0.456854	0.455383	0.457959	0.454029	0.441603	0.457517	0.456441
BIRB-796	0.478039	0.477165	0.481253	0.477487	0.479187	0.478697	0.479413	0.47753	0.478694	0.479863	0.475524	0.476721	0.477082	0.480224	0.476576	0.481529	0.475357	0.475295	0.479924	0.479964	0.478032	0.47924	0.474622	0.481239	0.475451	0.476942	0.479181	0.478738	0.477522	0.479261	0.474966	0.479376	0.480622	0.475503	0.479981	0.481871	0.478671	0.478862	0.480676	0.4786	0.473178	0.480772	0.475894	0.478535	0.481571	0.477157	0.466766	0.478373	0.476094
KW-2449	0.432188	0.437985	0.436263	0.432141	0.428432	0.423139	0.429953	0.42786	0.432274	0.426406	0.422011	0.43501	0.440717	0.435989	0.428673	0.432104	0.451219	0.436699	0.424905	0.431743	0.42798	0.428794	0.433369	0.439697	0.428831	0.4168	0.437335	0.413473	0.444552	0.435277	0.452247	0.427264	0.434138	0.40209	0.434243	0.436503	0.430014	0.423868	0.428553	0.443091	0.419617	0.439161	0.423103	0.41279	0.428382	0.440497	0.419362	0.422724	0.43199
silmitasertib	0.436324	0.439995	0.443504	0.443261	0.440391	0.435034	0.432999	0.439922	0.43915	0.433809	0.453877	0.445371	0.444066	0.446505	0.448662	0.448282	0.44588	0.431263	0.437884	0.438495	0.437885	0.441126	0.443013	0.444842	0.446552	0.43874	0.441089	0.414825	0.439215	0.443959	0.433027	0.436149	0.445254	0.423578	0.439871	0.435325	0.441769	0.436416	0.443596	0.447039	0.447534	0.434892	0.438095	0.433595	0.433895	0.435159	0.45721	0.420557	0.442359
momelotinib	0.413863	0.421261	0.424203	0.419583	0.414908	0.40934	0.418648	0.406812	0.422163	0.411059	0.423796	0.419347	0.426286	0.432612	0.427922	0.418033	0.427086	0.412302	0.411222	0.417757	0.420192	0.411053	0.42358	0.419455	0.41408	0.412588	0.413626	0.398239	0.42536	0.414879	0.421131	0.417386	0.419194	0.398711	0.411516	0.410038	0.418639	0.409285	0.421949	0.422536	0.416641	0.410239	0.403803	0.406682	0.410186	0.414365	0.430308	0.401257	0.420273
CAL-101	0.458948	0.457158	0.455823	0.459383	0.455809	0.449511	0.450213	0.451945	0.455355	0.448593	0.459666	0.458246	0.468642	0.453705	0.458054	0.463018	0.453736	0.450918	0.456918	0.460549	0.451898	0.457868	0.468432	0.449876	0.46249	0.456091	0.448951	0.46399	0.454376	0.456094	0.45302	0.454349	0.460924	0.450057	0.461916	0.456707	0.455955	0.455786	0.459335	0.457796	0.466543	0.449797	0.447555	0.457373	0.460608	0.451844	0.469553	0.451487	0.458449
WP1130	0.381105	0.387138	0.389573	0.388612	0.391044	0.387056	0.392854	0.387789	0.385052	0.387262	0.389403	0.389645	0.378239	0.389517	0.385815	0.387348	0.393221	0.392019	0.380438	0.388477	0.383335	0.385415	0.386258	0.391732	0.388744	0.381704	0.392564	0.376817	0.386093	0.385449	0.393933	0.389947	0.383939	0.381289	0.385063	0.387568	0.384744	0.382614	0.387453	0.387507	0.383656	0.384153	0.385472	0.378831	0.384431	0.383912	0.387894	0.383636	0.389145
OSI-027	0.392942	0.398916	0.405133	0.410815	0.39992	0.390858	0.392395	0.395954	0.400145	0.387284	0.410659	0.405772	0.414486	0.402357	0.403258	0.41007	0.401545	0.387559	0.388937	0.400465	0.393219	0.398803	0.409567	0.403703	0.407896	0.393221	0.402537	0.389082	0.393237	0.400168	0.394704	0.398376	0.419621	0.379644	0.40816	0.395284	0.397676	0.396814	0.404451	0.406104	0.405518	0.401835	0.392008	0.388041	0.397571	0.397014	0.413752	0.375001	0.398365
NVP-BSK805	0.424192	0.418094	0.425458	0.42424	0.421474	0.415872	0.423345	0.417963	0.419245	0.418969	0.423736	0.421309	0.42866	0.424273	0.422189	0.432894	0.425635	0.413311	0.423948	0.41987	0.416395	0.422804	0.427397	0.425862	0.419751	0.415123	0.421636	0.416706	0.425804	0.422394	0.422179	0.419513	0.428869	0.406974	0.427775	0.425946	0.417847	0.417583	0.430844	0.425664	0.422394	0.431492	0.416298	0.416191	0.42376	0.419174	0.437466	0.412528	0.419405
PIK-93	0.416943	0.41735	0.418293	0.417765	0.418322	0.416888	0.418221	0.417423	0.417669	0.415778	0.417917	0.418362	0.418152	0.418817	0.417703	0.419001	0.418551	0.41821	0.416808	0.417167	0.417313	0.417567	0.417764	0.4184	0.417202	0.417109	0.417832	0.417144	0.417523	0.41754	0.418803	0.417632	0.418631	0.415681	0.417824	0.418391	0.417705	0.417979	0.418892	0.418223	0.416483	0.418394	0.416947	0.416373	0.417027	0.416595	0.419082	0.415883	0.417199
AZD7762	0.278799	0.310581	0.283798	0.288511	0.300557	0.302012	0.298613	0.288409	0.302605	0.28839	0.285967	0.295921	0.270556	0.295303	0.288693	0.27924	0.296573	0.31763	0.267246	0.287608	0.286671	0.280938	0.27858	0.294485	0.279679	0.291582	0.304265	0.257172	0.303663	0.285066	0.319734	0.294177	0.28461	0.285637	0.273768	0.284793	0.284074	0.284061	0.285676	0.289422	0.261796	0.293244	0.290041	0.270577	0.267874	0.281068	0.28146	0.289948	0.307695
birinapant	0.440695	0.485426	0.44455	0.464887	0.472703	0.465963	0.464683	0.433347	0.47183	0.460434	0.450109	0.46997	0.463089	0.457063	0.466231	0.458996	0.458644	0.485766	0.452482	0.460586	0.46632	0.437002	0.443509	0.453261	0.448233	0.483908	0.451923	0.456097	0.485365	0.445828	0.458769	0.4536	0.466788	0.462136	0.436052	0.431546	0.469439	0.432569	0.481758	0.461636	0.46351	0.466988	0.45128	0.453609	0.453198	0.427885	0.51766	0.435463	0.476547
KX2-391	0.287414	0.334386	0.321807	0.288306	0.327001	0.319979	0.28396	0.306516	0.32749	0.337709	0.30823	0.337178	0.300515	0.336294	0.32099	0.327434	0.337942	0.30081	0.311861	0.311897	0.327679	0.31248	0.257963	0.347538	0.269567	0.308296	0.322874	0.25208	0.342607	0.320776	0.281463	0.311428	0.309809	0.278454	0.292134	0.31937	0.340738	0.319038	0.321859	0.318171	0.28008	0.34132	0.316579	0.299387	0.311279	0.325591	0.20861	0.274715	0.296971
3-Cl-AHPC	0.357218	0.390418	0.393218	0.378184	0.399215	0.390443	0.370272	0.382233	0.406313	0.385429	0.388932	0.396839	0.369226	0.39815	0.386301	0.375423	0.38505	0.385516	0.369961	0.387098	0.396265	0.378016	0.366345	0.413035	0.372565	0.375934	0.394986	0.348883	0.389389	0.383534	0.398014	0.391804	0.392319	0.369192	0.380936	0.37752	0.385104	0.381237	0.396732	0.394867	0.384131	0.391659	0.395124	0.371177	0.372651	0.394841	0.356004	0.36253	0.384819
KHS101	0.406215	0.412006	0.41853	0.414443	0.417845	0.415919	0.411512	0.413169	0.419008	0.419148	0.407219	0.414099	0.409611	0.419126	0.415823	0.406258	0.411736	0.411623	0.412676	0.411838	0.417533	0.416096	0.400554	0.423933	0.402802	0.412168	0.417888	0.401918	0.419039	0.415701	0.406189	0.414113	0.417465	0.410076	0.414036	0.414635	0.412698	0.417799	0.418766	0.413264	0.399748	0.415377	0.42602	0.410021	0.41611	0.412097	0.396454	0.406762	0.409368
WAY-362450	0.490914	0.493069	0.490153	0.488027	0.490542	0.492165	0.48806	0.489053	0.490892	0.494408	0.486477	0.48894	0.491153	0.488702	0.488719	0.489571	0.487847	0.489006	0.49199	0.492209	0.488489	0.490736	0.487553	0.489015	0.488166	0.490532	0.490153	0.497032	0.491124	0.491017	0.486429	0.488842	0.490023	0.493038	0.489504	0.490057	0.490664	0.490225	0.490099	0.487106	0.488871	0.488889	0.489239	0.493267	0.493233	0.488907	0.484298	0.490712	0.490334
cabozantinib	0.431138	0.425571	0.439856	0.425411	0.417197	0.422094	0.42523	0.426271	0.423569	0.430527	0.428808	0.422196	0.441915	0.431215	0.440832	0.422449	0.423179	0.425208	0.425753	0.42541	0.419073	0.430829	0.419123	0.433755	0.413809	0.419402	0.431408	0.413725	0.439235	0.426705	0.419568	0.42249	0.43938	0.404305	0.44178	0.4311	0.427582	0.423473	0.440835	0.43667	0.407301	0.438965	0.422747	0.414161	0.429261	0.425009	0.418162	0.411871	0.427211
BRD-K34222889	0.371062	0.382898	0.387605	0.37571	0.386073	0.38116	0.390268	0.374425	0.377385	0.377709	0.381328	0.388843	0.368844	0.384199	0.372547	0.402077	0.389734	0.385347	0.363834	0.39214	0.372954	0.382369	0.382982	0.402887	0.386131	0.378025	0.387722	0.35559	0.390945	0.384394	0.391814	0.387941	0.384617	0.366471	0.381325	0.382526	0.380782	0.371988	0.386231	0.391897	0.384792	0.387695	0.372173	0.367714	0.37562	0.375817	0.407421	0.368536	0.38814
linsitinib	0.463329	0.464572	0.480114	0.477061	0.48564	0.486093	0.496272	0.471634	0.476361	0.47423	0.474894	0.462749	0.464364	0.484374	0.454306	0.458262	0.484311	0.481061	0.462517	0.46584	0.479839	0.474053	0.454979	0.486161	0.471163	0.471336	0.477031	0.442907	0.48028	0.477157	0.488981	0.488269	0.476991	0.460557	0.482857	0.478967	0.47026	0.4837	0.455971	0.48499	0.442489	0.485534	0.477674	0.452441	0.478688	0.481606	0.464716	0.479087	0.48109
ML031	0.456257	0.458549	0.466789	0.464562	0.467356	0.462195	0.46441	0.463708	0.464768	0.463948	0.464958	0.466193	0.4597	0.466077	0.465009	0.456221	0.465982	0.463038	0.459534	0.464754	0.464261	0.463524	0.461146	0.474715	0.46026	0.457621	0.469936	0.446185	0.467959	0.464068	0.46142	0.46724	0.464826	0.451957	0.465071	0.459208	0.464497	0.459575	0.467629	0.468272	0.454781	0.466027	0.468345	0.455975	0.463775	0.463877	0.457324	0.458953	0.462377
[truncated: 235 more columns]
